# Supplementary material for: A tiling-deletion-based genetic screen for cis-regulatory element identification in mammalian cells
Source: Springer Nature journal article supplement (doi:10.1038/nmeth.4264), 2017-04-17
Supplement: nmeth.4264-S5.xlsx [file nmeth.4264-S5.xlsx]

## Sheet: cis_vs_ctrl
Table S3. Statistical enrichment of each sgRNA pair in the Cis samples compared to the control samples
Table is generated by function ‘glmQLFTest’ in R package ‘egeR’
sgRNA pair	logFC	logCPM	PValue
>eGFP-1	6.40776	9.83003	1.10238e-05
>eGFP-2	6.4339	9.291	1.12259e-05
>eGFP-3	6.52512	10.5256	2.97736e-06
>eGFP-4	6.58698	9.96734	1.41002e-06
>eGFP-5	6.5932	11.4798	5.11455e-06
>eGFP-6	6.53433	11.1741	6.21996e-06
>NEG_30523114	0.299415	2.62144	0.910347
>NEG_30523214	0.177353	5.56813	0.91848
>NEG_30526846	0.433982	4.44569	0.853146
>NEG_30526901	0.0941684	2.82524	0.971183
>NEG_30529487	-0.323579	1.57423	0.901668
>NEG_30529554	0.496259	3.09151	0.851815
>NEG_30539505	0.75833	3.98321	0.764848
>NEG_30540923	-0.603562	3.36135	0.810396
>NEG_30558012	0.494284	4.69488	0.824619
>NEG_30559534	-5.70226	1.46305	0.031491
>NEG_30565109	-0.165023	3.99542	0.945742
>NEG_30565125	-0.0892296	6.62369	0.938205
>NEG_30565220	0	0.215196	1
>NEG_30565243	-0.680379	2.62872	0.793433
>NEG_30565679	-0.0515383	2.5699	0.984501
>NEG_30566005	-0.456066	4.11328	0.847238
>NEG_30569693	0.491185	0.956338	0.860538
>NEG_30590996	-0.367112	2.20348	0.888033
>NEG_30591278	-0.109072	4.35919	0.962396
>NEG_30591285	-5.84111	1.54333	0.0286508
>NEG_30591313	0	0.215196	1
>NEG_30591348	-0.702121	2.10471	0.786842
>NEG_30591413	0.832517	2.56643	0.763972
>NEG_30591899	-0.0488874	4.05961	0.983901
>NEG_30591931	0.900654	7.6351	0.25917
>NEG_30591940	0.354206	1.74582	0.893949
>NEG_30592288	-1.19056	2.84841	0.633213
>NEG_30592346	-1.85133	4.29497	0.403765
>NEG_30592384	0.819398	5.47234	0.658138
>NEG_30592393	-0.0685872	5.23642	0.971079
>NEG_30592431	0.102139	4.91054	0.960886
>NEG_30608194	0.148387	6.30558	0.910065
>NEG_30608263	1.08584	4.32301	0.66167
>NEG_30608278	0	0.215196	1
>NEG_30608292	0.441426	5.2484	0.819415
>NEG_30608523	3.40067	6.27504	0.0360271
>NEG_30617382	-1.54886	2.41746	0.533867
>NEG_30617562	0.336746	2.58286	0.899561
>NEG_30617616	0.0278532	4.13685	0.990714
>NEG_30617641	0.342299	4.44673	0.883277
>NEG_30617663	-0.344556	4.12471	0.8848
>NEG_30617672	0	0.215196	1
>NEG_30617704	-0.40654	5.18572	0.829591
>NEG_30618060	-1.47078	3.15599	0.548302
>NEG_30618080	-1.1536	1.90978	0.651847
>NEG_30618171	0.0604028	4.7999	0.977453
>NEG_30620471	0	0.215196	1
>NEG_30620622	-0.459821	4.3567	0.839877
>NEG_30631389	0.33799	2.46085	0.898872
>NEG_30631395	0.517627	6.98565	0.61093
>NEG_30631474	-0.256898	0.869846	0.911929
>NEG_30631990	-0.0273093	4.19416	0.990881
>NEG_30632031	-1.71102	0.571036	0.49021
>NEG_30632036	0	0.215196	1
>NEG_30632095	0.728822	3.92154	0.775542
>NEG_30632339	-0.712645	3.16601	0.77658
>NEG_30632353	-0.00799684	4.45687	0.997203
>NEG_30632443	0.0974368	5.45893	0.95649
>NEG_30632468	0.0317348	4.67816	0.988405
>NEG_30632716	0.531679	4.9403	0.801084
>NEG_30632951	0.978749	3.9113	0.705731
>NEG_30632995	-0.305267	6.58866	0.791869
>NEG_30633013	1.21025	1.59985	0.659253
>NEG_30633019	0	0.215196	1
>NEG_30633040	0.016708	3.5245	0.994712
>NEG_30633063	-0.0954042	4.93705	0.962774
>NEG_30633074	-0.986903	4.35247	0.658261
>NEG_30646993	-2.53982	1.30131	0.339647
>NEG_30647047	0.181854	5.94915	0.904086
>NEG_30647054	-1.27598	4.50901	0.553822
>NEG_30647083	-2.61153	0.404291	0.206659
>NEG_30647095	-1.28757	3.68091	0.591618
>NEG_30647408	0.507635	4.68332	0.820377
>NEG_30647415	-0.546128	4.54794	0.80343
>NEG_30647523	-0.327056	2.40758	0.900018
>NEG_30673267	0.259086	5.6101	0.880051
>NEG_30677588	-0.231976	6.3419	0.855518
>NEG_30677627	-0.607814	3.05804	0.812095
>NEG_30677635	-0.0291002	3.51342	0.990939
>NEG_30689795	-0.310409	3.50866	0.901749
>NEG_30689902	-0.573203	4.86823	0.778641
>NEG_30690705	-4.02985	0.719376	0.0919671
>NEG_30690826	-0.523174	4.39963	0.816416
>NEG_30691158	-0.527562	3.26517	0.834634
>NEG_30691827	0	0.215196	1
>NEG_30691866	-0.861067	5.05281	0.655971
>NEG_30692004	0.145076	7.08837	0.880117
>NEG_30693051	0	0.215196	1
>NEG_30693073	-1.98756	1.58304	0.426848
>NEG_30693134	0.691475	4.34174	0.77499
>NEG_30693203	-0.226427	5.44068	0.898204
>NEG_30693472	0.0563512	5.81322	0.971486
>NEG_30693479	0.0333568	4.01113	0.989125
>NEG_30693496	0.263015	2.32767	0.92073
>NEG_30693521	0.530941	4.26383	0.826975
>NEG_30693566	0.229108	4.9816	0.911264
>NEG_30693604	-0.0559803	3.24447	0.982761
>NEG_30702639	0.0566183	6.45522	0.963528
>NEG_30702674	-0.456915	4.32899	0.841421
>NEG_30722212	0.0208292	3.55216	0.993491
>NEG_30722229	0.620136	3.1698	0.816467
>NEG_30722758	-0.312497	0.869384	0.905982
>NEG_30722800	-0.193983	4.20769	0.934551
>NEG_30746489	0.347861	4.61027	0.877392
>NEG_30746557	-1.11197	2.16937	0.662027
>NEG_30746583	0.562658	4.87295	0.793471
>NEG_30746601	1.13498	1.49461	0.680258
>NEG_30746634	0.191355	3.23495	0.941342
>NEG_30746662	-0.111038	5.73588	0.945031
>NEG_30746719	0.615734	3.27043	0.817087
>NEG_30746850	0.141369	6.50064	0.907987
>NEG_30746897	-0.287602	2.26642	0.912247
>NEG_30748525	0.338555	3.96781	0.891777
>NEG_30748545	0.497863	4.43293	0.832385
>NEG_30748567	1.18062	0.72114	0.646239
>NEG_30748581	0	0.215196	1
>NEG_30748718	-0.580842	5.88259	0.697277
>NEG_30748739	0.23236	5.73714	0.887069
>NEG_30748767	-0.230561	3.51476	0.927106
>NEG_30748835	-0.329322	2.47417	0.900052
>NEG_30754822	-1.30172	2.92775	0.599657
>NEG_30754832	0.530335	3.84927	0.833984
>NEG_30754863	-0.496047	4.6042	0.819092
>NEG_30754906	1.90198	1.62546	0.519041
>NEG_30754926	0.794145	2.30843	0.77073
>NEG_30754997	-0.144719	4.24129	0.950985
>NEG_30755065	-0.739908	3.76571	0.759904
>NEG_30757938	-0.39237	6.93887	0.691157
>NEG_30758067	0.649126	1.78597	0.807916
>NEG_30758369	-0.390833	2.79097	0.879646
>NEG_30758410	0.638512	2.12763	0.811928
>NEG_30758488	-0.130482	5.60042	0.938481
>NEG_30763041	0	0.215196	1
>NEG_30763690	0.42674	2.23407	0.875964
>NEG_30763717	-0.168767	3.90437	0.944835
>NEG_30766398	0.346035	1.2772	0.898431
>NEG_30766428	-1.11351	2.59373	0.660285
>NEG_30766454	-0.0717261	6.35466	0.955217
>NEG_30766505	-0.385063	4.76786	0.85449
>NEG_30766526	0.163262	7.95873	0.815757
>NEG_30766532	-0.180004	5.07446	0.927048
>NEG_30766545	0.840845	3.27676	0.755911
>NEG_30776323	0	0.215196	1
>NEG_30793179	1.59044	6.56132	0.221023
>NEG_30793223	1.19051	2.49149	0.66952
>NEG_30793273	0.157905	6.96519	0.875112
>NEG_30793288	1.12524	2.15749	0.685976
>NEG_30793298	0.226028	5.11195	0.909422
>NEG_30793306	-0.616636	2.73319	0.80952
>NEG_30793327	1.12302	1.13048	0.694853
>NEG_30795116	-0.206249	4.10339	0.931431
>NEG_30795129	-4.42426	0.853703	0.0722618
>NEG_30795855	-0.0557638	7.02398	0.954411
>NEG_30795942	0.118233	4.66479	0.957252
>NEG_30795984	-2.77966	1.97222	0.266369
>NEG_30796669	1.29749	6.37245	0.343642
>NEG_30796681	-1.30482	1.52147	0.605167
>NEG_30796689	-1.64395	1.25474	0.525312
>NEG_30796692	-0.21774	2.94976	0.933037
>NEG_30796716	0.985101	2.45512	0.720184
>NEG_30797226	-3.4943	0.571012	0.126192
>NEG_30797255	0.0173541	1.40873	0.994363
>NEG_30797260	-0.0870252	0.650956	0.980287
>NEG_30797288	0.375703	2.10862	0.887011
>NEG_30798487	0.0200885	5.72524	0.990135
>NEG_30798538	0.0527182	3.51441	0.983678
>NEG_30798570	-0.802174	4.03736	0.732949
>NEG_30801887	-6.45567	1.94151	0.0186775
>NEG_30806177	-0.0990413	0.855181	0.975168
>NEG_30806221	-2.78639	1.92139	0.266162
>NEG_30806289	0.503198	2.3498	0.851663
>NEG_30806460	-0.510924	4.49527	0.818225
>NEG_30806522	1.91935	2.51359	0.50989
>NEG_30806566	0	0.215196	1
>NEG_30806711	-0.206359	3.28092	0.935795
>NEG_30806741	0.666882	2.42347	0.806663
>NEG_30806757	0.14534	7.52997	0.85662
>NEG_30806828	-0.13018	7.27052	0.883434
>NEG_30818554	-0.186602	3.65234	0.940407
>NEG_30818582	0.625634	3.05181	0.815961
>NEG_30818609	0.242978	5.27353	0.898252
>NEG_30818625	0.485553	5.2303	0.803399
>NEG_30818639	-0.609082	3.64612	0.803442
>NEG_30818669	0.329256	3.21274	0.90038
>NEG_30818674	-0.0387555	4.48312	0.986417
>NEG_30818698	0.205237	0.94399	0.949258
>NEG_30820315	-0.577367	5.04403	0.767043
>NEG_30820369	-0.675155	1.41102	0.79307
>NEG_30820413	0.305962	2.0759	0.911238
>NEG_30822451	-3.78315	0.646992	0.106547
>NEG_30822500	-3.8761	2.44709	0.128137
>NEG_30822581	0.0663091	3.14446	0.979904
>NEG_30822618	0	0.215196	1
>NEG_30835371	-1.87975	2.88785	0.494777
>NEG_30835491	-0.262065	3.20858	0.918395
>NEG_30839926	-0.843935	2.41996	0.743313
>NEG_30845452	-0.591455	3.78907	0.806644
>NEG_30845518	2.05287	6.22665	0.17449
>NEG_30845539	-0.654453	3.73564	0.786981
>NEG_30845544	-0.209785	6.44965	0.864169
>NEG_30845599	0.206519	4.64222	0.925982
>NEG_30845657	-1.27036	2.35477	0.612345
>NEG_30857785	-0.363798	5.73447	0.819276
>NEG_30857823	1.22119	3.85452	0.643623
>NEG_30857844	0.234187	4.79193	0.913373
>NEG_30866479	0.330842	3.78575	0.895763
>NEG_30866491	-0.232991	3.4233	0.92697
>NEG_30866544	-1.01979	1.14318	0.688922
>NEG_30866565	-0.379143	6.04681	0.788779
>NEG_30866600	-0.254025	3.58337	0.91909
>NEG_30886570	-4.19485	2.32881	0.122283
>NEG_30886619	-0.236742	4.08438	0.921259
>NEG_30886653	-2.0749	1.50537	0.407383
>NEG_30886671	2.26011	5.54132	0.254529
>NEG_30897878	-3.71143	2.67868	0.140878
>NEG_30897981	0	0.215196	1
>NEG_30902893	0.105388	1.65818	0.969075
>NEG_30902932	-0.192748	1.3911	0.941461
>NEG_30902960	-0.0561239	5.40749	0.975137
>NEG_30903000	1.00026	3.49438	0.709795
>NEG_30904416	-0.172301	2.22835	0.947808
>NEG_30904430	0	0.215196	1
>NEG_30904438	0.885128	6.27356	0.522422
>NEG_30904730	-0.495794	2.16397	0.847344
>NEG_30914242	0.226531	5.5273	0.897872
>NEG_30919923	0.684271	4.74653	0.758733
>NEG_30920009	-7.31748	2.57371	0.0109144
>NEG_30920150	0.0741837	5.29349	0.968426
>NEG_30920170	0.396669	2.82305	0.882342
>NEG_30923953	1.13729	4.45562	0.668057
>NEG_30923980	0.585897	4.96199	0.780451
>NEG_30923987	-0.765582	5.3472	0.666953
>NEG_30924050	-0.257314	3.85055	0.916209
>NEG_30925263	-5.96262	1.61822	0.0263575
>NEG_30952137	-5.29734	1.24109	0.0412969
>NEG_30952290	0.0619184	5.10508	0.974986
>NEG_30953582	-0.0261901	5.2439	0.988963
>NEG_30953604	-0.870709	4.78513	0.682635
>NEG_30953647	-0.371984	5.72941	0.815575
>NEG_30953657	-0.285284	6.49962	0.812245
>NEG_30953686	0	0.215196	1
>NEG_30956603	0.76733	6.04846	0.608781
>NEG_30956668	0.371767	2.74288	0.889771
>NEG_30957718	0.584338	5.03523	0.777503
>NEG_30957768	1.07119	4.59226	0.649849
>NEG_30957790	0.711987	5.77744	0.667067
>NEG_30957793	-0.202158	2.70085	0.938394
>NEG_30957860	-0.0807725	2.19476	0.975691
>NEG_30958285	-0.0455215	5.13793	0.98134
>NEG_30958303	-0.658313	4.62487	0.758526
>NEG_30958331	2.16227	6.21007	0.158312
>NEG_30958363	-1.19496	2.02541	0.63515
>NEG_30958573	-0.253744	4.23968	0.913756
>NEG_30958685	0	0.215196	1
>NEG_30959571	0.559427	3.44133	0.832135
>NEG_30959711	-0.632182	2.26237	0.805052
>NEG_30960159	1.49655	1.11365	0.586834
>NEG_30960269	-0.0528711	4.69588	0.980558
>NEG_30960284	0.0808665	3.13263	0.975419
>NEG_30960297	-1.26406	3.78611	0.593383
>NEG_30960568	0.116332	3.34981	0.964508
>NEG_30960606	0.247265	6.07215	0.863995
>NEG_30960614	-0.134264	5.9245	0.928645
>NEG_30960619	0.204116	4.06227	0.933423
>NEG_30960682	4.97464	1.4817	0.100732
>NEG_30960724	0.62235	2.95102	0.817396
>NEG_30961961	0.133989	6.9127	0.895997
>NEG_30962063	-1.82622	0.312878	0.312652
>NEG_30962114	-0.323789	1.10381	0.898299
>NEG_30962138	1.052	3.707	0.691037
>NEG_30962195	-0.0756243	2.7336	0.976988
>NEG_30962198	-0.556628	5.06334	0.774311
>NEG_30962329	0.154955	5.88046	0.92018
>NEG_30962349	-0.413077	4.94361	0.837267
>NEG_30962371	0	0.215196	1
>NEG_30968767	0.0925869	5.99441	0.950017
>NEG_30968817	-0.0877369	5.12762	0.964048
>NEG_30968843	-0.108229	4.21642	0.963556
>NEG_30968882	0.21743	2.22291	0.935493
>NEG_30983750	-0.738488	2.84772	0.771438
>NEG_30983787	0.0244059	4.50281	0.991369
>NEG_30983811	0.900027	3.87358	0.727781
>NEG_30983828	0.503523	4.42443	0.831244
>NEG_30983869	0	0.215196	1
>NEG_30989680	0	0.215196	1
>NEG_30989686	1.23808	3.30072	0.653128
>NEG_30989882	-0.389093	5.12125	0.839673
>NEG_30989935	0.740756	1.14675	0.777497
>NEG_30989990	0.728806	3.71778	0.778954
>NEG_30990004	0.0211304	0.883968	0.991871
>NEG_30991385	-1.03029	6.37177	0.399792
>NEG_30998153	0	0.215196	1
>NEG_30998165	0.452587	4.67003	0.839776
>NEG_30998198	0.160224	5.96186	0.914871
>NEG_30998451	-0.857585	2.49904	0.736383
>NEG_30998569	0.0166918	5.52332	0.99237
>NEG_30998604	-1.57121	1.19366	0.532902
>NEG_31018353	0.744168	7.58624	0.357441
>NEG_31018375	0	0.215196	1
>NEG_31018447	3.77611	5.68286	0.0692425
>NEG_31018453	0.23351	5.07739	0.907182
>NEG_31018545	0.165752	3.45575	0.948639
>NEG_31031423	0.561501	2.37563	0.835305
>NEG_31031469	-0.148975	3.01882	0.954154
>NEG_31031477	0.31905	5.0767	0.87406
>NEG_31031501	-0.312334	4.37919	0.891074
>NEG_31050265	0.378913	3.20504	0.885704
>NEG_31050290	-5.83861	1.54289	0.0286989
>NEG_31050465	-0.776856	4.65658	0.713779
>NEG_31050471	-0.0688305	5.9435	0.963263
>NEG_31057710	0.720559	6.0879	0.624717
>NEG_31057731	-0.611322	3.76396	0.801073
>NEG_31057804	0.262875	6.62804	0.822262
>NEG_31062133	-0.127503	5.90997	0.932556
>NEG_31084113	-2.28009	1.55693	0.413095
>NEG_31084168	0.0254707	4.08396	0.991616
>NEG_31084270	0	0.215196	1
>NEG_31118665	0.538849	3.8184	0.832589
>NEG_31118674	-0.608402	2.9731	0.810257
>NEG_31118726	0.300229	5.12719	0.879704
>NEG_31118750	-0.379651	5.01748	0.847676
>NEG_31120161	2.27889	7.62055	0.00919957
>NEG_31120223	-2.25686	1.34909	0.372938
>NEG_31120228	0.655834	2.73673	0.809987
>NEG_31120255	0	0.215196	1
>NEG_31120368	-0.418759	6.2538	0.747765
>NEG_31120378	-0.408075	7.51722	0.605366
>NEG_31120395	0	0.215196	1
>NEG_31144739	0.732416	3.07905	0.785317
>NEG_31144798	-0.464967	3.2591	0.855142
>NEG_31144825	0.214725	4.79963	0.920368
>NEG_31144875	-0.769635	6.38338	0.633563
>NEG_31146586	0.0553476	7.26074	0.950874
>NEG_31155593	0.442028	5.3938	0.811674
>NEG_31155606	-0.300421	4.2491	0.897361
>NEG_31155655	0	0.215196	1
>NEG_31155692	0.0917494	4.22999	0.969344
>NEG_31159887	0	0.215196	1
>NEG_31159977	-4.73105	0.975884	0.0595998
>NEG_31160060	0	0.215196	1
>NEG_31163472	0.631887	2.83291	0.816362
>NEG_31163499	0	0.215196	1
>NEG_31186680	-0.248227	2.90585	0.923575
>NEG_31186730	0.656974	5.96773	0.673026
>NEG_31186733	1.35794	2.08694	0.627006
>NEG_31186769	0	0.215196	1
>NEG_31186799	-0.523158	3.62292	0.832169
>NEG_31190069	0.550267	3.73899	0.840714
>NEG_31190152	0.759849	2.63123	0.782436
>NEG_31190192	-0.32139	6.17537	0.81164
>NEG_31190378	0.272502	3.14991	0.917275
>NEG_31190469	-0.928611	5.22989	0.611629
>NEG_31190494	3.34089	0.504219	0.194291
>NEG_31190515	-0.0317779	3.3637	0.990183
>NEG_31190749	-0.224269	2.49381	0.93156
>NEG_31190948	0	0.215196	1
>NEG_31191030	1.32858	4.73676	0.566428
>NEG_31191112	-0.0934045	1.46684	0.97377
>NEG_31204021	-1.08048	1.47361	0.669942
>NEG_31204071	-0.146821	3.52062	0.953915
>NEG_31204134	-4.02776	0.71925	0.0920767
>NEG_31204144	-1.82648	0.988882	0.487478
>NEG_31204219	-0.37646	6.14027	0.782607
>NEG_31204238	0.0581956	3.20884	0.982095
>NEG_31213354	-0.109914	2.61158	0.966595
>NEG_31213401	0	0.215196	1
>NEG_31213557	-2.6444	1.28964	0.295426
>NEG_31215508	-0.171659	6.02194	0.90527
>NEG_31215554	1.11758	1.92756	0.687756
>NEG_31215597	0.0299229	3.84318	0.99033
>NEG_31215654	-0.406223	7.11277	0.662444
>NEG_31215692	-0.836715	1.37739	0.744026
>NEG_31218157	0	0.215196	1
>NEG_31218258	4.35827	0.747585	0.129172
>NEG_31218910	-0.155044	3.7268	0.950188
>NEG_31218939	0	0.215196	1
>NEG_31218966	-2.04302	1.24517	0.416706
>NEG_31219005	-0.152404	2.27968	0.954039
>NEG_31219034	0.149724	0.503379	0.98058
>NEG_31219056	-0.137371	5.53488	0.936704
>NEG_31234018	-1.21771	2.73639	0.64045
>NEG_31234092	5.09266	4.69229	0.0844104
>NEG_31234122	0.171671	5.00603	0.932747
>NEG_31234150	-0.488856	4.41845	0.854496
>NEG_31234551	-3.89894	3.65705	0.10379
>NEG_31234576	0	0.215196	1
>NEG_31235219	-0.0436166	7.45236	0.957883
>NEG_31235232	0.779571	3.56157	0.768677
>NEG_31235287	0.0776481	4.17344	0.974241
>NEG_31235295	0.803764	2.79172	0.769364
>NEG_31235326	0.0931995	4.3113	0.968453
>NEG_31237367	-2.28744	1.5558	0.376974
>NEG_31237392	-0.799297	2.35643	0.753767
>NEG_31237465	0	0.215196	1
>NEG_31237488	1.02078	4.24113	0.682841
>NEG_31238244	-1.36213	1.68169	0.593005
>NEG_31238260	-1.73563	1.14642	0.490961
>NEG_31238317	0.0764956	7.33143	0.930348
>NEG_31245001	2.34619	2.91487	0.432634
>NEG_31245035	-0.644732	2.1008	0.807795
>NEG_31246404	-3.48839	0.570753	0.12659
>NEG_31246464	0.113877	6.68663	0.920024
>NEG_31246892	0.126027	7.28544	0.88777
>NEG_31246906	1.5379	3.34402	0.583098
>NEG_31246964	-0.2505	4.70126	0.907022
>NEG_31247647	-0.200944	2.6961	0.938633
>NEG_31247773	-0.212143	1.58595	0.936108
>NEG_31247800	-0.603014	3.46589	0.808831
>NEG_31247864	-0.413202	2.53871	0.873886
>NEG_31247877	1.02447	1.8558	0.70768
>NEG_31247900	0	0.215196	1
>NEG_31248403	0.14874	4.82886	0.944309
>NEG_31248515	-0.285176	4.93279	0.888343
>NEG_31248837	-0.321336	3.17367	0.899693
>NEG_31248850	-0.00191349	5.81254	0.999039
>NEG_31248975	-0.280735	3.10825	0.912694
>NEG_31248986	0	0.215196	1
>NEG_31250376	-0.334316	4.84754	0.871608
>NEG_31250395	0.443783	4.72178	0.840761
>NEG_31256478	0	0.215196	1
>NEG_31256506	0.219098	4.83307	0.918205
>NEG_31256528	0.0700493	5.05518	0.972076
>NEG_31256533	0.131993	3.75755	0.95787
>NEG_31256613	0.327048	2.67409	0.902057
chr6:30132134-30135081	0.133402	7.10104	0.889299
chr6:30132154-30136329	1.91089	7.36453	0.0642314
chr6:30132159-30139582	-0.99267	4.13102	0.668132
chr6:30132333-30135422	-0.431896	8.42207	0.486722
chr6:30132384-30136433	-0.910229	5.8549	0.633699
chr6:30132465-30135467	-0.902286	4.67904	0.696413
chr6:30132704-30135599	-1.19584	5.32769	0.604271
chr6:30132705-30136787	-1.06719	6.91185	0.44824
chr6:30134702-30135634	-0.855988	4.02629	0.748584
chr6:30134819-30135905	-0.5694	7.86237	0.449848
chr6:30134952-30135926	0	0.215196	1
chr6:30134969-30137612	0	0.215196	1
chr6:30135033-30140722	-0.446138	7.24458	0.614256
chr6:30135062-30136074	5.27727	1.89166	0.0989674
chr6:30135178-30136293	0.171276	6.54628	0.886813
chr6:30135413-30136351	1.95749	2.71209	0.513854
chr6:30135509-30138329	1.1543	7.61943	0.157126
chr6:30135523-30136529	5.27727	1.89166	0.0989674
chr6:30135633-30136792	0.628856	5.49598	0.72957
chr6:30135656-30141180	-1.27285	4.21543	0.64522
chr6:30135703-30138378	2.06142	3.78678	0.473041
chr6:30135795-30137041	-0.761006	5.75751	0.623954
chr6:30135905-30137128	0.000491533	7.2124	0.999566
chr6:30136057-30137516	1.83148	4.75711	0.441429
chr6:30136075-30138690	-0.534549	8.39262	0.371659
chr6:30136244-30137563	0	0.215196	1
chr6:30136350-30137651	1.10507	5.34943	0.660967
chr6:30136419-30139472	0	0.215196	1
chr6:30136484-30137827	-0.118094	5.11579	0.960792
chr6:30136766-30137972	0.0301101	3.50048	0.990808
chr6:30136786-30140127	2.34252	2.74635	0.434738
chr6:30136802-30143132	0.261187	6.5356	0.880878
chr6:30136966-30138177	-0.328946	7.17781	0.718073
chr6:30137059-30138273	0.979679	2.3262	0.720485
chr6:30137421-30138324	-0.158879	6.27621	0.903483
chr6:30137523-30138479	-1.10395	6.50715	0.476283
chr6:30137598-30140406	0.112725	4.43004	0.963779
chr6:30137646-30149159	-0.358807	5.57567	0.840919
chr6:30137650-30138629	-0.31543	7.27346	0.824417
chr6:30137781-30138832	-0.858313	4.68424	0.72722
chr6:30137943-30139313	0	0.215196	1
chr6:30137987-30140717	-3.78069	0.646864	0.106692
chr6:30138042-30139449	-1.38276	6.11201	0.338853
chr6:30138212-30139540	2.74368	8.35963	0.000302244
chr6:30138309-30139604	-0.842846	5.30619	0.639034
chr6:30138348-30140854	0	0.215196	1
chr6:30138427-30140059	0.0371311	4.897	0.986989
chr6:30138511-30152045	6.21638	2.31878	0.0753107
chr6:30138577-30140110	-0.603265	7.54876	0.434601
chr6:30138689-30141160	1.46423	4.63887	0.579919
chr6:30138695-30140350	0.009798	7.65862	0.989662
chr6:30139012-30140397	-0.369018	6.32729	0.771768
chr6:30139397-30140566	-1.19047	5.53233	0.474642
chr6:30139464-30142192	-0.203478	6.24261	0.908463
chr6:30139500-30140703	-0.839514	8.19904	0.17836
chr6:30139581-30152901	0.0990686	6.20948	0.941853
chr6:30139618-30140848	0.518432	4.2676	0.854389
chr6:30139683-30143079	-2.58108	5.72713	0.200463
chr6:30139914-30141138	-0.488933	5.98113	0.774628
chr6:30140117-30142021	-0.403029	4.35176	0.859718
chr6:30140259-30142025	0.754958	5.98364	0.624791
chr6:30140369-30142185	-0.224328	4.06894	0.929731
chr6:30140386-30143353	-0.370671	5.14297	0.857558
chr6:30140411-30153470	-2.36086	6.23246	0.0851011
chr6:30140563-30142515	-1.30368	3.92825	0.582464
chr6:30140587-30147936	1.62484	5.61307	0.520775
chr6:30140716-30142534	2.28723	8.11171	0.00495076
chr6:30140802-30149147	-0.263121	6.14421	0.908923
chr6:30140858-30142932	0	0.215196	1
chr6:30140929-30154030	-5.45353	2.59752	0.0457223
chr6:30141145-30143077	1.1455	5.11979	0.661891
chr6:30141152-30150026	-5.83674	1.54257	0.0287351
chr6:30141918-30143180	-1.52216	3.8135	0.528917
chr6:30142024-30143334	-0.753451	6.19263	0.676149
chr6:30142171-30143446	-2.83925	4.07187	0.21691
chr6:30142186-30150084	0.0163578	7.95196	0.981281
chr6:30142296-30143548	-0.467879	5.8484	0.778991
chr6:30142532-30145510	0.356565	4.14613	0.88442
chr6:30142874-30147711	-0.544501	3.59909	0.83192
chr6:30143053-30147850	0.746598	6.88733	0.48591
chr6:30143078-30150594	1.38721	5.8877	0.402089
chr6:30143121-30156507	-0.829678	8.13967	0.19205
chr6:30143162-30149113	-1.2158	4.91826	0.537306
chr6:30143306-30149292	-2.32154	2.61795	0.384287
chr6:30143358-30152044	-0.469289	5.8405	0.782096
chr6:30143416-30149556	0.829242	4.59433	0.755713
chr6:30143547-30149559	-2.16667	5.24354	0.321677
chr6:30145425-30149823	0.0200606	5.75614	0.990168
chr6:30146004-30149995	0.614276	5.49073	0.73555
chr6:30147841-30150041	-1.33198	5.63294	0.472013
chr6:30147864-30152448	-1.5266	3.0618	0.534184
chr6:30147940-30157218	-0.242892	4.6314	0.911501
chr6:30149100-30150150	0.130025	6.65616	0.909855
chr6:30149137-30152520	-0.571943	7.56943	0.454838
chr6:30149215-30150561	-1.81854	1.56839	0.485116
chr6:30149436-30150853	5.80611	0.883693	0.11296
chr6:30149558-30151165	-0.419844	6.03874	0.812519
chr6:30149667-30152747	-0.595466	5.55002	0.774119
chr6:30149752-30151396	-0.189677	5.27524	0.935024
chr6:30149927-30151954	0	0.215196	1
chr6:30150039-30152032	-0.151417	7.52331	0.848968
chr6:30150048-30152955	-2.153	5.88681	0.136583
chr6:30150124-30157670	5.43511	7.02422	0.000193583
chr6:30150132-30152132	-0.389087	5.32731	0.839757
chr6:30150570-30152331	-2.4651	3.97991	0.283134
chr6:30150593-30153250	-0.471513	6.22144	0.719808
chr6:30150787-30152447	-1.6592	4.7592	0.48885
chr6:30151084-30152665	-1.52589	6.18009	0.397443
chr6:30151349-30152786	0.877165	8.39332	0.172151
chr6:30151925-30152900	-0.652034	5.69555	0.699252
chr6:30151969-30153460	-0.922695	3.3727	0.709141
chr6:30152011-30153015	0.654803	3.6116	0.803139
chr6:30152143-30153177	1.21912	3.95499	0.641609
chr6:30152223-30153793	-0.0934687	4.4607	0.96765
chr6:30152327-30153345	0.030297	6.6966	0.978509
chr6:30152435-30153435	-0.0282825	6.0062	0.984565
chr6:30152503-30154020	-0.585864	4.33235	0.7965
chr6:30152664-30153536	6.23437	2.65734	0.109427
chr6:30152743-30154255	-0.221825	4.92097	0.91547
chr6:30152760-30153684	-1.13452	7.7667	0.106472
chr6:30152837-30158199	0.0765304	8.27372	0.903553
chr6:30152899-30153754	1.29549	3.95069	0.626386
chr6:30152954-30154973	0.158014	5.17232	0.943269
chr6:30153011-30153960	0.173466	8.54518	0.773868
chr6:30153174-30154048	6.44048	2.16764	0.0595205
chr6:30153201-30156170	-0.674224	8.41441	0.25485
chr6:30153286-30154169	-0.699335	5.76074	0.717268
chr6:30153382-30158963	-2.56958	4.38245	0.286249
chr6:30153407-30154672	-2.79299	4.40792	0.198045
chr6:30153428-30156390	-0.640313	7.54901	0.406011
chr6:30153514-30154916	0.704784	8.21745	0.290415
chr6:30153626-30155111	-0.726034	7.07589	0.435565
chr6:30153760-30156168	0.175467	1.77919	0.948118
chr6:30153792-30156497	-0.578804	5.51425	0.765178
chr6:30153935-30156403	1.55211	7.90273	0.0443505
chr6:30154009-30156698	-0.444988	4.18167	0.859872
chr6:30154021-30159558	-0.420987	4.0133	0.876497
chr6:30154042-30156467	-0.785492	4.17068	0.768945
chr6:30154168-30156581	0.261012	6.71994	0.816637
chr6:30154251-30157107	4.9674	0.625258	0.11501
chr6:30154337-30156693	0.229193	5.20194	0.923376
chr6:30154918-30157210	-0.937054	6.41154	0.437707
chr6:30154922-30156843	3.38111	1.39123	0.306088
chr6:30155119-30157092	-1.09537	5.02852	0.658093
chr6:30155202-30157507	-0.202908	4.52992	0.927968
chr6:30156143-30157171	-1.97678	4.67851	0.39968
chr6:30156205-30157735	6.38908	2.78815	0.111073
chr6:30156331-30157289	-1.17678	5.87783	0.544835
chr6:30156403-30163454	1.90491	3.8262	0.490089
chr6:30156457-30158103	-0.170656	5.2531	0.927469
chr6:30156466-30157500	-0.813637	4.06236	0.761777
chr6:30156575-30157604	0	0.215196	1
chr6:30156671-30158331	0.959684	3.83729	0.725663
chr6:30156683-30157732	0.899201	2.49795	0.751521
chr6:30156855-30157957	-0.90904	8.54427	0.209046
chr6:30156935-30158538	-0.126936	4.14048	0.95946
chr6:30157036-30158046	0.00904385	5.71656	0.995581
chr6:30157113-30163477	-1.20907	3.51588	0.619924
chr6:30157143-30158172	0.0546114	6.09592	0.969265
chr6:30157194-30158819	-0.798661	6.79528	0.442242
chr6:30157301-30158328	-0.344425	3.41424	0.89583
chr6:30157475-30158519	1.09745	4.23111	0.708111
chr6:30157501-30159513	0.225809	4.64697	0.927376
chr6:30157601-30158606	-4.72973	0.975762	0.0596479
chr6:30157651-30164334	-0.199445	4.72615	0.934482
chr6:30157722-30158732	-1.41175	4.41429	0.576329
chr6:30157734-30159728	-1.75455	5.38299	0.410313
chr6:30157894-30158960	-2.1496	5.8566	0.335747
chr6:30158044-30159306	-1.35696	5.40803	0.568972
chr6:30158061-30160634	0	0.215196	1
chr6:30158150-30159506	-0.299516	9.0045	0.584343
chr6:30158200-30164780	-0.641799	5.86948	0.668706
chr6:30158329-30162943	-1.53193	3.88195	0.562457
chr6:30158340-30159511	0.329591	7.31191	0.711844
chr6:30158516-30159711	0.148168	7.22616	0.88162
chr6:30158551-30163321	-0.887477	2.66123	0.737099
chr6:30158605-30160079	-1.92542	4.97121	0.411792
chr6:30158742-30160224	-2.62719	0.788442	0.298397
chr6:30158821-30163520	-1.60466	5.08756	0.49466
chr6:30158923-30160576	6.17645	1.03916	0.112973
chr6:30158961-30165714	0.0733982	6.39311	0.953803
chr6:30159156-30160583	-0.793538	9.67103	0.117915
chr6:30159307-30162851	-0.710109	4.72434	0.734647
chr6:30159507-30163086	0	0.215196	1
chr6:30159512-30163889	-1.31316	5.09461	0.485649
chr6:30159515-30166915	-0.458569	6.66938	0.734389
chr6:30159651-30163157	0.301148	5.58903	0.861946
chr6:30159726-30164210	-4.24048	0.788168	0.0809276
chr6:30160031-30163297	0.391402	5.03437	0.860454
chr6:30160128-30164571	-1.15404	5.40578	0.578393
chr6:30160225-30163438	-0.315469	3.9538	0.907664
chr6:30160459-30163530	0.498353	3.16596	0.850642
chr6:30160582-30163783	1.93165	3.61921	0.493873
chr6:30162845-30163849	1.31978	7.59312	0.114064
chr6:30162944-30168206	0.248972	7.77494	0.737065
chr6:30162947-30163986	-0.771063	7.31449	0.364035
chr6:30162952-30164767	-0.918886	4.61109	0.713491
chr6:30163087-30164208	1.54358	3.00649	0.594837
chr6:30163263-30164333	-0.369953	2.49012	0.897364
chr6:30163301-30165199	-0.108704	5.83157	0.959197
chr6:30163396-30164504	0.57391	8.19694	0.388819
chr6:30163449-30168234	-0.912171	7.02897	0.548378
chr6:30163516-30164637	-0.888806	5.66057	0.578691
chr6:30163531-30165707	0.109473	6.34479	0.94074
chr6:30163698-30164735	-7.95911	3.08843	0.0134396
chr6:30163818-30164991	-5.77303	1.50372	0.0300129
chr6:30163856-30166271	4.61215	1.42732	0.114525
chr6:30163926-30165121	0.531609	8.96603	0.354703
chr6:30164161-30165198	-0.141387	6.72972	0.913134
chr6:30164209-30166288	-1.68268	4.30907	0.447903
chr6:30164235-30169962	-0.0554579	5.47331	0.977862
chr6:30164328-30165671	-0.0866828	7.14977	0.925824
chr6:30164481-30165834	5.0428	3.11513	0.169154
chr6:30164564-30166561	-7.58885	2.78837	0.0122535
chr6:30164618-30166026	0.161044	8.33027	0.796059
chr6:30164734-30166279	-1.15259	6.00146	0.535378
chr6:30164736-30172429	-0.202635	5.15544	0.916151
chr6:30164756-30166910	-0.413081	6.58207	0.7208
chr6:30164851-30166406	5.19378	1.82971	0.0981241
chr6:30165014-30166445	-0.820149	8.25067	0.346593
chr6:30165124-30167386	-0.980371	5.85599	0.510294
chr6:30165166-30166537	-3.47859	3.16133	0.178494
chr6:30165262-30173287	-0.185432	5.81692	0.915994
chr6:30165657-30166726	0.105249	6.79724	0.95036
chr6:30165692-30168179	-0.753335	3.77436	0.784026
chr6:30165743-30166896	0.260592	5.62259	0.903397
chr6:30166025-30167171	-7.96115	3.08933	0.0138105
chr6:30166048-30168495	-0.677176	4.24183	0.791668
chr6:30166208-30167271	-7.1954	2.48012	0.010918
chr6:30166272-30168669	-0.651894	5.02243	0.740716
chr6:30166341-30167372	-0.61102	3.82843	0.805951
chr6:30166425-30173870	-0.468358	5.53742	0.782832
chr6:30166444-30167919	0.901843	2.5968	0.743451
chr6:30166512-30169079	-0.488268	7.32275	0.56881
chr6:30166536-30168128	-2.49483	4.60362	0.236874
chr6:30166680-30168314	1.3816	4.8286	0.544855
chr6:30166860-30168435	0	0.215196	1
chr6:30166892-30169256	0.0914513	4.57144	0.967491
chr6:30166950-30174853	0	0.215196	1
chr6:30167013-30168494	-0.919846	4.02296	0.697026
chr6:30167184-30168651	0.646128	6.66871	0.712116
chr6:30167371-30168810	-2.67165	4.01103	0.244816
chr6:30167373-30169865	0	0.215196	1
chr6:30167743-30168841	-0.87475	7.59544	0.241698
chr6:30168138-30169034	1.21757	5.72185	0.484144
chr6:30168189-30170339	-7.85343	3.00104	0.0133771
chr6:30168195-30175423	0.682565	6.23609	0.757152
chr6:30168233-30169178	-1.1948	5.62768	0.54789
chr6:30168371-30169773	-0.0176828	5.85779	0.990882
chr6:30168436-30172255	-1.45569	5.96733	0.393731
chr6:30168460-30169874	-0.612961	7.80836	0.386294
chr6:30168578-30170253	-6.32537	1.85256	0.0204759
chr6:30168638-30172428	1.51545	4.92158	0.528475
chr6:30168692-30170596	-0.852682	4.90771	0.709339
chr6:30168817-30171562	0	0.215196	1
chr6:30168834-30178237	-0.219035	6.60817	0.857591
chr6:30168859-30172690	-0.573445	6.4161	0.727703
chr6:30169033-30171945	-0.573847	6.25163	0.708447
chr6:30169078-30173147	0.117522	5.78739	0.949232
chr6:30169186-30172061	0.896959	3.94539	0.743828
chr6:30169761-30172206	-7.60909	2.80405	0.0121353
chr6:30169774-30173851	-2.40876	3.87415	0.299098
chr6:30169870-30172374	-1.16568	7.2539	0.175361
chr6:30170238-30172669	-1.40248	5.96876	0.397535
chr6:30170338-30174159	-1.50545	4.41944	0.536388
chr6:30170361-30173050	-0.513433	6.11412	0.707667
chr6:30171507-30173100	0.557299	5.16994	0.779761
chr6:30171929-30173192	4.60918	0.61181	0.118123
chr6:30172056-30173638	-0.80241	7.99542	0.569015
chr6:30172197-30173731	-0.819818	5.78035	0.594799
chr6:30172207-30174825	-5.11858	4.86483	0.0565309
chr6:30172258-30179364	-1.87753	5.80794	0.308103
chr6:30172373-30173862	-0.493552	5.04476	0.834489
chr6:30172442-30175332	-0.455767	6.92115	0.711374
chr6:30172614-30173972	0	0.215196	1
chr6:30172689-30176098	1.00128	6.41746	0.44948
chr6:30172737-30174096	-0.297336	5.14179	0.901073
chr6:30173103-30174271	0.222179	5.02281	0.914195
chr6:30173118-30176104	1.49425	3.68759	0.583592
chr6:30173189-30174596	5.19378	1.82971	0.0981241
chr6:30173197-30180782	0.0111198	7.86843	0.987585
chr6:30173340-30174808	0.161048	5.20725	0.933743
chr6:30173669-30174801	0.0404791	8.36008	0.947769
chr6:30173850-30176805	-2.7307	5.10154	0.232398
chr6:30173861-30175192	-0.888142	5.64271	0.661072
chr6:30173869-30180802	-0.79362	4.80887	0.699482
chr6:30173973-30175213	0.952282	3.99062	0.715909
chr6:30174077-30175331	0.0521873	5.83959	0.976327
chr6:30174106-30178070	-0.588768	5.791	0.770374
chr6:30174207-30175452	-1.01921	6.94702	0.29086
chr6:30174414-30175668	0.0521814	3.53496	0.98458
chr6:30174648-30175727	-0.572887	6.73478	0.595492
chr6:30174796-30176014	0	0.215196	1
chr6:30174802-30178106	-6.05046	3.06907	0.0275387
chr6:30174852-30181412	-0.510284	6.42132	0.676479
chr6:30174977-30176054	1.2033	9.40317	0.0359614
chr6:30175211-30176537	0.155246	1.82712	0.951251
chr6:30175292-30179243	-0.175291	6.8396	0.866759
chr6:30175325-30176770	0	0.215196	1
chr6:30175344-30181847	0.319852	4.72788	0.883954
chr6:30175429-30176771	-1.11828	7.58144	0.13354
chr6:30175520-30179246	-0.462299	5.64876	0.778006
chr6:30175563-30176956	-0.444079	7.5699	0.563773
chr6:30175684-30177426	-0.0933165	5.80861	0.964127
chr6:30175957-30177447	1.18764	3.54361	0.67371
chr6:30176053-30178063	-2.4996	3.97653	0.314527
chr6:30176087-30179731	-0.241628	7.42302	0.783343
chr6:30176345-30178177	1.4513	9.49055	0.0120903
chr6:30176529-30178341	-1.29278	4.31928	0.601035
chr6:30176770-30178802	-0.771357	6.13655	0.638267
chr6:30176791-30180768	-0.309206	6.56902	0.790661
chr6:30176950-30179117	0.852605	4.49116	0.740488
chr6:30176980-30182515	-1.03695	7.70494	0.148624
chr6:30177287-30179218	-0.0371476	8.36521	0.95177
chr6:30177433-30179372	0	0.215196	1
chr6:30177491-30181030	-0.550983	6.04469	0.778986
chr6:30178034-30179725	-0.922235	8.62688	0.165122
chr6:30178073-30181279	-3.29893	4.1494	0.182389
chr6:30178188-30180245	2.01658	5.09331	0.443161
chr6:30178249-30183223	1.67815	4.44251	0.549184
chr6:30178340-30180556	-0.764829	4.70489	0.759292
chr6:30178342-30181490	-0.0282736	4.72702	0.991304
chr6:30178727-30180740	-0.651336	4.98822	0.792088
chr6:30178982-30180795	-0.67423	3.14674	0.788211
chr6:30179232-30181022	-0.127359	8.36717	0.834858
chr6:30179245-30181803	-1.3536	4.1304	0.617264
chr6:30179347-30181024	0	0.215196	1
chr6:30179700-30181194	0.304894	3.53586	0.912381
chr6:30179730-30182490	-6.50007	1.97074	0.0180995
chr6:30179780-30187197	6.12871	2.0836	0.0717296
chr6:30179986-30181278	-0.183861	6.93929	0.853677
chr6:30180250-30181417	-0.321206	5.10498	0.868485
chr6:30180664-30181500	-0.617057	6.39902	0.615676
chr6:30180747-30183131	-8.75834	3.76152	0.0147543
chr6:30180782-30181639	-0.898149	4.68019	0.740127
chr6:30180811-30187314	0	0.215196	1
chr6:30180905-30181775	3.82355	0.979144	0.153937
chr6:30181023-30182091	0.72201	3.16882	0.789657
chr6:30181029-30183454	-1.31337	6.70214	0.21826
chr6:30181142-30182144	0	0.215196	1
chr6:30181253-30182278	-0.66564	7.22156	0.451093
chr6:30181265-30183818	-0.957891	5.84778	0.561953
chr6:30181313-30193382	-0.524379	6.07881	0.706542
chr6:30181388-30182351	2.49664	10.1748	1.90658e-05
chr6:30181488-30182489	-2.33267	5.25433	0.322974
chr6:30181501-30184187	-0.0677451	5.21966	0.975156
chr6:30181612-30182668	-1.90268	5.50007	0.320616
chr6:30181763-30184631	-6.95247	2.29527	0.0130545
chr6:30181771-30183044	-0.4898	4.84772	0.811235
chr6:30181822-30199337	0.492992	2.01056	0.85798
chr6:30181887-30183130	-1.52027	5.94425	0.285797
chr6:30182106-30183203	-1.95888	3.95426	0.407963
chr6:30182226-30183440	0.305439	5.54012	0.903244
chr6:30182350-30183747	0.673188	9.29651	0.229888
chr6:30182354-30186461	0	0.215196	1
chr6:30182445-30184046	1.0368	0.828381	0.714223
chr6:30182497-30199651	-0.427179	7.28412	0.62388
chr6:30182620-30184176	-0.766724	4.6977	0.764109
chr6:30182999-30184243	0.0824378	4.65555	0.97004
chr6:30183101-30184385	-7.29406	2.55557	0.0107995
chr6:30183111-30187190	0	0.215196	1
chr6:30183186-30206544	0.371065	4.36421	0.875178
chr6:30183202-30184604	-0.994012	5.74448	0.551043
chr6:30183439-30185126	-1.40559	5.62339	0.403483
chr6:30183442-30187435	4.09816	7.65771	0.00333937
chr6:30183746-30185286	-1.0867	3.84377	0.687322
chr6:30183778-30193238	-0.635323	7.47505	0.425174
chr6:30184012-30185826	0.983934	3.59307	0.713217
chr6:30184085-30193248	0	0.215196	1
chr6:30184132-30185924	3.02159	9.63031	2.51436e-05
chr6:30184230-30209956	-0.725855	5.25893	0.691983
chr6:30184237-30186295	-0.0471929	4.39774	0.983671
chr6:30184336-30193738	2.84306	1.97809	0.408585
chr6:30184345-30186455	0.36671	5.95231	0.809665
chr6:30184587-30187030	-0.46325	6.49886	0.7701
chr6:30184689-30187168	-3.19427	2.96589	0.208877
chr6:30185279-30187251	5.05818	1.73117	0.0972354
chr6:30185384-30187416	-0.805454	3.67003	0.742047
chr6:30185827-30188676	1.84491	8.76476	0.00412504
chr6:30186293-30189078	-1.76771	3.86145	0.524816
chr6:30186446-30189220	-1.12141	5.1814	0.578086
chr6:30186460-30194305	0	0.215196	1
chr6:30186964-30190476	0	0.215196	1
chr6:30187108-30190931	0.165375	3.34095	0.949314
chr6:30187203-30195401	0.175164	7.35226	0.840929
chr6:30187241-30191571	-0.164724	5.50969	0.924646
chr6:30187316-30225081	-0.262168	5.08283	0.905817
chr6:30187374-30192706	0.168821	2.60097	0.948299
chr6:30187434-30195555	-0.197694	9.10662	0.716389
chr6:30188211-30193204	-0.589291	6.12731	0.664624
chr6:30188695-30193346	0	0.215196	1
chr6:30189217-30193452	-0.326994	6.16805	0.873242
chr6:30190470-30193731	0	0.215196	1
chr6:30190825-30193884	1.19249	4.1047	0.678153
chr6:30190932-30195810	-1.33278	2.69016	0.599103
chr6:30190962-30194257	-0.19369	7.49186	0.810152
chr6:30192594-30194774	-0.310584	11.0079	0.510789
chr6:30193155-30194774	-0.207102	6.63953	0.895807
chr6:30193234-30227289	4.39761	1.29347	0.124015
chr6:30193247-30196264	5.56832	2.11459	0.102022
chr6:30193301-30194949	-0.477219	5.37594	0.832978
chr6:30193423-30195361	-0.632743	5.97533	0.660373
chr6:30193730-30195387	-3.09243	4.58005	0.284369
chr6:30193737-30199176	0.209622	5.41651	0.9108
chr6:30193833-30195554	-0.828666	6.54142	0.559169
chr6:30194264-30195713	0	0.215196	1
chr6:30194306-30228273	-0.184608	6.65236	0.870657
chr6:30194315-30199650	-4.23683	0.787918	0.0810998
chr6:30194377-30195860	0.100829	2.3152	0.970949
chr6:30194783-30196082	-0.549213	6.1194	0.742848
chr6:30194933-30196124	0.115299	3.69307	0.966701
chr6:30194936-30201698	0	0.215196	1
chr6:30195189-30196204	-0.652309	4.87333	0.756829
chr6:30195392-30202367	-0.178411	2.68657	0.945651
chr6:30195393-30196398	6.37059	2.77248	0.110897
chr6:30195551-30196616	-0.33072	8.45837	0.579433
chr6:30195712-30197648	-0.644694	6.4517	0.632168
chr6:30195795-30206478	-3.09448	2.38302	0.234488
chr6:30195860-30197828	7.42783	3.09813	0.0822454
chr6:30195977-30198610	-5.47364	1.33432	0.0367316
chr6:30196083-30198875	-1.82143	5.4816	0.29027
chr6:30196203-30199141	0.959919	3.82146	0.713289
chr6:30196205-30206480	0.407587	4.88487	0.848013
chr6:30196334-30199320	-0.302272	7.11352	0.746781
chr6:30196456-30199508	0.924964	5.6167	0.602709
chr6:30197159-30199646	-0.0528339	5.08043	0.981995
chr6:30197771-30199895	1.3761	4.50139	0.6125
chr6:30198474-30200387	-1.11887	6.59254	0.481776
chr6:30198659-30200801	-1.81329	4.42146	0.402755
chr6:30199079-30201184	-1.16648	6.83856	0.246506
chr6:30199175-30209473	0.443459	4.98631	0.843105
chr6:30199288-30201684	-0.435352	3.7751	0.858926
chr6:30199356-30229956	-0.124543	3.24313	0.968196
chr6:30199463-30202140	0.36877	5.71971	0.863911
chr6:30199627-30202213	0	0.215196	1
chr6:30199647-30209648	-1.44405	4.77314	0.529725
chr6:30199714-30202360	0.937757	6.4478	0.620905
chr6:30200045-30202883	5.10489	1.76482	0.0972449
chr6:30200810-30204475	0.212809	5.30561	0.910091
chr6:30201146-30204591	-1.20235	3.24702	0.624852
chr6:30201630-30204928	-1.13312	4.77314	0.579932
chr6:30201685-30209856	-0.907373	5.34857	0.608802
chr6:30201687-30231151	-1.82622	0.312878	0.312652
chr6:30201957-30205436	-1.54619	4.29748	0.517236
chr6:30202154-30205864	-1.10404	4.58776	0.603859
chr6:30202348-30206182	-1.1455	8.05858	0.0756795
chr6:30202366-30211752	-0.571346	3.69914	0.816638
chr6:30202580-30206358	-0.538537	5.85636	0.747203
chr6:30203603-30206477	-0.83055	4.5184	0.703597
chr6:30204490-30206546	-1.64291	4.2037	0.468522
chr6:30204903-30207512	0	0.215196	1
chr6:30204933-30212345	0.235138	5.48029	0.917611
chr6:30205384-30209022	0.690012	6.25683	0.61603
chr6:30205848-30209425	7.14981	1.32461	0.0895257
chr6:30206065-30209481	0	0.215196	1
chr6:30206262-30209631	-0.426054	2.08599	0.870115
chr6:30206415-30209763	-0.613139	8.09701	0.344712
chr6:30206493-30212581	3.1922	0.773908	0.30237
chr6:30206526-30209887	-4.12556	3.16889	0.111875
chr6:30207523-30210077	0.678891	4.07612	0.789919
chr6:30207567-30222734	-0.277725	6.74326	0.798186
chr6:30208447-30210624	-1.00372	5.86644	0.499073
chr6:30209034-30210824	0.0572286	4.57882	0.981398
chr6:30209426-30211683	-2.73433	3.15201	0.260351
chr6:30209624-30212237	0.546596	5.31553	0.800794
chr6:30209637-30222743	0.988433	6.96763	0.347267
chr6:30209770-30212253	-0.198756	4.7558	0.938069
chr6:30209825-30225032	0.103739	4.68438	0.966384
chr6:30209872-30212362	-0.19247	5.3569	0.915742
chr6:30209929-30232024	-0.643526	6.94567	0.509759
chr6:30209975-30212580	4.54122	3.16426	0.210897
chr6:30210068-30227010	-5.63288	1.42192	0.033006
chr6:30210301-30215368	-1.20971	4.60855	0.625429
chr6:30210789-30215658	-1.63466	4.09893	0.474033
chr6:30211670-30222341	0.648355	4.9283	0.76115
chr6:30211742-30227254	0.0834004	5.04012	0.968849
chr6:30212042-30222354	0	0.215196	1
chr6:30212253-30222733	-0.413914	6.79523	0.767388
chr6:30212347-30224195	-0.289523	5.48431	0.867919
chr6:30212363-30228014	-0.768365	5.85341	0.608062
chr6:30212494-30224367	-3.4961	4.75821	0.159592
chr6:30212577-30228171	0.055519	4.86193	0.978826
chr6:30212670-30225016	0.490433	2.92656	0.856222
chr6:30215443-30225530	-1.28831	2.20828	0.607155
chr6:30215646-30226576	1.64431	4.85552	0.517669
chr6:30222335-30226887	-0.568865	7.35502	0.605171
chr6:30222714-30226932	-0.973829	7.17903	0.273669
chr6:30222728-30228496	-0.57033	5.89722	0.702183
chr6:30222744-30232955	0.107167	5.37491	0.953482
chr6:30224194-30227172	-0.532293	6.82168	0.733101
chr6:30224306-30227292	0	0.215196	1
chr6:30225015-30227395	-0.947582	10.0488	0.0524854
chr6:30225037-30228796	-0.206401	6.30442	0.900305
chr6:30225448-30227796	-0.520684	6.46468	0.735543
chr6:30226292-30227988	-0.181056	7.97399	0.791881
chr6:30226614-30228112	0.00943955	5.66932	0.995429
chr6:30226916-30228272	-1.26456	7.46583	0.106749
chr6:30226950-30229653	3.88472	0.431504	0.159211
chr6:30227185-30228416	-1.09175	4.83485	0.596278
chr6:30227201-30229958	-0.162956	8.42594	0.787658
chr6:30227288-30235207	-0.49056	6.26321	0.761714
chr6:30227291-30228719	-0.531245	8.19971	0.399163
chr6:30227394-30228795	1.71278	9.1824	0.00448618
chr6:30227791-30228992	-0.619328	7.25321	0.636426
chr6:30227803-30229960	0.284853	6.58526	0.811139
chr6:30228001-30229584	-0.195072	3.07155	0.939712
chr6:30228125-30229733	0.268673	7.85461	0.711418
chr6:30228145-30230179	-8.96423	3.93904	0.0145203
chr6:30228174-30256579	-1.92965	3.91423	0.407327
chr6:30228248-30229893	-2.50041	3.04881	0.304865
chr6:30228415-30230127	0	0.215196	1
chr6:30228502-30230997	-1.1042	4.62055	0.603858
chr6:30228667-30230284	-0.301489	6.03536	0.83291
chr6:30228725-30231244	-0.921417	2.9001	0.713406
chr6:30228794-30230453	-1.00742	3.96147	0.697177
chr6:30228883-30257922	-0.550488	6.83366	0.593457
chr6:30228991-30230649	1.56215	8.82346	0.012512
chr6:30229008-30232001	-0.13264	6.63642	0.913166
chr6:30229566-30230756	0.504776	5.91288	0.793826
chr6:30229732-30230832	-1.23957	3.78886	0.617064
chr6:30229734-30232214	-1.32478	3.32131	0.589453
chr6:30229865-30230971	-1.19019	6.56203	0.50972
chr6:30229959-30232716	-3.00085	5.365	0.119132
chr6:30230072-30231163	5.57733	0.801251	0.113205
chr6:30230177-30232954	-6.88892	2.24943	0.0136745
chr6:30230214-30231243	0.394059	6.88469	0.708592
chr6:30230379-30231692	-2.85424	3.06934	0.258241
chr6:30230491-30231975	-1.1965	6.39567	0.446355
chr6:30230649-30232159	1.18356	5.01208	0.674355
chr6:30230811-30232234	1.43607	3.25204	0.655372
chr6:30230955-30232662	0	0.215196	1
chr6:30230972-30233178	-1.49251	5.49188	0.522018
chr6:30231002-30260998	-2.13453	4.56389	0.362186
chr6:30231109-30232671	0	0.215196	1
chr6:30231184-30234196	-2.77853	6.87006	0.0946828
chr6:30231227-30232846	0	0.215196	1
chr6:30231670-30232937	-0.89815	6.06471	0.515889
chr6:30231967-30233122	-0.585921	6.53107	0.616248
chr6:30232000-30235153	0.0357175	5.08849	0.986332
chr6:30232002-30261579	-1.61748	6.58725	0.145542
chr6:30232133-30233246	-1.29081	6.07573	0.340548
chr6:30232213-30236771	0.605329	3.86135	0.830202
chr6:30232233-30234022	-0.610242	5.07806	0.752169
chr6:30232447-30234082	1.57747	4.12001	0.561749
chr6:30232663-30234136	-2.61143	2.6082	0.305282
chr6:30232694-30244032	-0.795712	4.85017	0.73409
chr6:30232707-30262327	3.99796	1.92797	0.218254
chr6:30232804-30234375	0	0.215196	1
chr6:30232939-30244641	-0.330743	5.42805	0.85484
chr6:30232941-30234434	7.28261	3.20515	0.076348
chr6:30233097-30234637	-0.447417	5.8067	0.772412
chr6:30233147-30244704	5.15006	1.79765	0.0976891
chr6:30233226-30234835	1.46608	4.0451	0.577875
chr6:30233305-30264004	0.388546	5.41364	0.845487
chr6:30233459-30234985	-3.17409	4.72164	0.178359
chr6:30234042-30235147	0.329719	6.13262	0.816185
chr6:30234142-30235208	-2.5143	3.57993	0.291403
chr6:30234153-30256543	0.0418401	5.51565	0.980914
chr6:30234280-30235648	-6.85887	2.22672	0.0139776
chr6:30234396-30235735	-6.18162	1.7572	0.0226446
chr6:30234608-30236664	-5.90255	1.58119	0.0274692
chr6:30234724-30236726	-5.47444	1.33443	0.0367124
chr6:30234945-30237503	-0.77013	2.28799	0.765041
chr6:30235094-30237510	-0.574425	5.68471	0.799312
chr6:30235161-30256924	-0.151615	6.4835	0.900695
chr6:30235217-30237927	-1.17611	5.53288	0.48057
chr6:30235571-30240388	-0.217744	5.05002	0.912269
chr6:30235672-30242444	-0.656128	8.70103	0.278288
chr6:30236585-30243109	-1.553	5.97919	0.328216
chr6:30236708-30243640	-5.32198	2.15479	0.0500917
chr6:30236755-30257550	-0.897164	8.36092	0.478373
chr6:30236945-30244028	-0.656559	7.24551	0.454989
chr6:30237518-30244249	-2.38417	5.58194	0.215156
chr6:30237784-30244413	4.91844	1.93671	0.154571
chr6:30239969-30244458	-0.195425	6.3464	0.917901
chr6:30240374-30244632	0.103979	5.71727	0.950404
chr6:30243110-30257801	-0.905409	5.76116	0.647702
chr6:30243114-30244737	-1.28427	3.02095	0.603364
chr6:30243637-30245077	-1.25933	3.38772	0.650284
chr6:30243997-30245227	-0.323173	5.45128	0.874636
chr6:30244040-30258063	-3.1137	0.489947	0.15669
chr6:30244132-30251171	-6.75978	2.15478	0.0150212
chr6:30244240-30252879	-5.5547	1.3787	0.0347898
chr6:30244433-30256082	-0.15973	8.65095	0.784477
chr6:30244606-30256523	-1.55722	5.89175	0.4529
chr6:30244692-30260590	0	0.215196	1
chr6:30244707-30256553	-1.043	4.55259	0.669546
chr6:30244864-30256772	1.02822	4.33054	0.677598
chr6:30245197-30256900	-1.46846	7.17169	0.0962365
chr6:30246174-30256964	2.84895	3.28235	0.35594
chr6:30251572-30257276	-0.223376	4.70744	0.925227
chr6:30255013-30257383	-0.287851	8.12821	0.658711
chr6:30256278-30257482	-1.7538	4.6395	0.401842
chr6:30256524-30257620	-2.76434	4.65866	0.283761
chr6:30256556-30260974	0	0.215196	1
chr6:30256585-30269683	-0.0141892	5.44442	0.994084
chr6:30256717-30257729	0.657906	4.84252	0.775389
chr6:30256803-30261553	-0.797799	6.5126	0.496169
chr6:30256823-30257881	-0.453198	8.87558	0.415035
chr6:30256929-30258048	-0.275628	4.7008	0.907524
chr6:30257127-30258245	-0.106229	5.14759	0.958053
chr6:30257337-30258344	-0.794028	8.10054	0.263219
chr6:30257466-30259319	-0.578137	6.82279	0.576811
chr6:30257505-30261976	-0.93839	3.84242	0.730793
chr6:30257590-30259523	-0.155017	7.80113	0.830145
chr6:30257728-30259737	1.18063	0.826423	0.663217
chr6:30257777-30262092	-1.58844	4.43556	0.508878
chr6:30257880-30259855	-2.0343	2.82042	0.417988
chr6:30257921-30270547	-0.841066	6.06957	0.602536
chr6:30258024-30260068	-1.92533	3.65894	0.480572
chr6:30258053-30262325	-0.474481	5.81742	0.757572
chr6:30258132-30260547	-0.973074	7.61008	0.187764
chr6:30258234-30260582	-0.740765	5.59822	0.666178
chr6:30258334-30260916	-0.0799541	4.23455	0.972997
chr6:30259519-30260961	-0.69313	8.52433	0.234362
chr6:30259652-30261249	-3.09548	3.47964	0.19775
chr6:30259847-30261514	0	0.215196	1
chr6:30260018-30261680	3.3637	7.34037	0.00161071
chr6:30260218-30261772	0.0724945	4.9155	0.977537
chr6:30260548-30261961	-0.296207	5.62937	0.896064
chr6:30260589-30262964	-0.491099	5.53719	0.772331
chr6:30260633-30272217	1.59501	8.52033	0.0154033
chr6:30260649-30262039	-0.448963	6.76404	0.694157
chr6:30260968-30262164	0	0.215196	1
chr6:30260983-30263776	-1.08696	6.25749	0.405936
chr6:30261154-30262324	-0.318528	6.75596	0.767944
chr6:30261505-30262409	-0.693761	5.36512	0.776346
chr6:30261549-30263996	-2.67851	5.47564	0.236435
chr6:30261554-30273354	-2.88447	3.15667	0.247333
chr6:30261653-30262591	-1.96145	6.24876	0.117624
chr6:30261771-30262871	-4.06866	1.37861	0.120813
chr6:30261795-30269533	-5.23298	2.61044	0.0506985
chr6:30261904-30262886	-0.402238	4.09089	0.868454
chr6:30262052-30263495	0	0.215196	1
chr6:30262058-30269665	-0.517062	4.21334	0.826202
chr6:30262093-30274271	-0.5121	9.34345	0.330834
chr6:30262163-30263776	0	0.215196	1
chr6:30262244-30270460	-0.620166	6.20741	0.661539
chr6:30262279-30263914	-0.933846	6.98885	0.327923
chr6:30262378-30264087	0.22032	6.0159	0.925634
chr6:30262473-30270868	-0.362428	4.1619	0.87795
chr6:30262567-30264238	0.382555	5.65521	0.822119
chr6:30262705-30264789	0	0.215196	1
chr6:30262868-30265084	-0.241595	6.64263	0.831839
chr6:30263337-30265801	-0.146694	3.28387	0.954447
chr6:30263761-30266487	0	0.215196	1
chr6:30263777-30271320	-0.37352	3.7508	0.895364
chr6:30263871-30274880	0.319107	3.31317	0.903933
chr6:30263926-30267284	0.904182	4.70383	0.691878
chr6:30263995-30272134	-1.37104	6.21056	0.285362
chr6:30264056-30269476	0.0627048	6.79494	0.953536
chr6:30264172-30269480	-0.0678651	4.87843	0.975205
chr6:30264239-30272396	-0.0337966	8.10871	0.959372
chr6:30264683-30269672	-0.760776	8.05904	0.244125
chr6:30265069-30270079	-3.77637	4.87886	0.116794
chr6:30265499-30270243	0.13531	5.51772	0.944323
chr6:30265793-30270368	-0.575862	3.63541	0.833667
chr6:30266477-30270495	-7.89843	3.03867	0.0132398
chr6:30269032-30270590	-2.67409	5.2172	0.215156
chr6:30269463-30270773	0	0.215196	1
chr6:30269524-30273346	-0.212013	6.84826	0.838721
chr6:30269658-30270954	-1.22598	7.12761	0.172625
chr6:30269668-30275881	-5.09955	1.1414	0.0470226
chr6:30270078-30271133	-1.04485	7.18827	0.237939
chr6:30270229-30271310	-0.927322	6.61433	0.407303
chr6:30270348-30271626	-0.113632	7.33722	0.895445
chr6:30270446-30273343	-0.457914	5.67325	0.82683
chr6:30270488-30271777	-1.03077	6.76471	0.554046
chr6:30270560-30277812	-1.66508	3.76884	0.479121
chr6:30270589-30272096	-0.577303	3.99127	0.824809
chr6:30270776-30272096	-0.320467	6.65727	0.775558
chr6:30270778-30274254	0.326897	5.46683	0.856112
chr6:30270935-30272204	-0.00519117	8.84489	0.992737
chr6:30271061-30272339	-0.586123	5.56382	0.776807
chr6:30271125-30274269	-0.17315	8.77494	0.762246
chr6:30271225-30272802	-0.819445	7.02935	0.386177
chr6:30271568-30273103	-6.2798	1.82168	0.0211418
chr6:30271759-30273313	-0.739515	4.39892	0.786429
chr6:30271967-30273357	-1.08108	6.97973	0.396504
chr6:30272094-30273468	-0.563047	6.21023	0.674153
chr6:30272119-30274850	-7.49148	2.71026	0.0116874
chr6:30272177-30279260	0.27925	6.6312	0.852429
chr6:30272194-30273553	0.930952	5.94413	0.554485
chr6:30272344-30273873	-0.960421	6.90108	0.329647
chr6:30272373-30274878	-1.61517	5.9235	0.363288
chr6:30272775-30273963	-0.330942	5.74122	0.847968
chr6:30272860-30275161	-0.14645	6.7452	0.893237
chr6:30273038-30274253	-0.0751212	3.83996	0.97688
chr6:30273251-30274546	0.823452	5.35508	0.667812
chr6:30273336-30275477	-1.2715	6.48806	0.276651
chr6:30273342-30274603	4.73819	1.50982	0.109322
chr6:30273358-30283372	-1.41354	5.05558	0.533027
chr6:30273444-30274862	0.565118	4.86785	0.815711
chr6:30273545-30275025	-4.6161	1.68941	0.0830085
chr6:30273820-30275100	-1.10615	4.67177	0.625475
chr6:30273898-30275718	-0.476006	3.19823	0.852905
chr6:30273947-30275249	0.124884	5.20842	0.948406
chr6:30274248-30275379	-3.7644	2.88528	0.148308
chr6:30274268-30276127	-1.34981	3.54791	0.590552
chr6:30274270-30284282	-1.06266	4.82806	0.607722
chr6:30274398-30275707	2.36243	7.80382	0.00471673
chr6:30274579-30275866	2.48415	8.28535	0.000643094
chr6:30274662-30277754	-0.0698909	7.28039	0.937183
chr6:30274861-30276052	-1.43884	5.00062	0.547394
chr6:30274863-30277767	-1.14331	5.42502	0.526995
chr6:30274879-30286738	0.1059	3.95534	0.967736
chr6:30274960-30276153	0	0.215196	1
chr6:30275099-30277142	-0.549721	5.11573	0.794492
chr6:30275111-30279253	1.18518	9.18448	0.0420729
chr6:30275241-30277225	0.33263	9.50557	0.538591
chr6:30275390-30277378	-0.915558	8.60817	0.199498
chr6:30275398-30279712	-0.614312	5.11526	0.747931
chr6:30275658-30277749	-4.28771	3.87923	0.0838124
chr6:30275722-30280403	0.908733	4.95857	0.744403
chr6:30275736-30293976	0.312502	6.92283	0.85675
chr6:30275832-30277861	6.63688	10.0831	1.47943e-07
chr6:30276028-30277994	-0.288813	6.12155	0.870678
chr6:30276126-30280486	0.425169	7.70231	0.577221
chr6:30276128-30278170	-1.67929	3.99362	0.525146
chr6:30277096-30279096	-0.110697	7.65261	0.883052
chr6:30277219-30279113	1.48102	8.45264	0.0248677
chr6:30277237-30281374	-5.90135	1.58097	0.0274914
chr6:30277387-30279246	-0.195515	2.32398	0.940649
chr6:30277725-30279532	-2.02535	5.41908	0.230168
chr6:30277748-30281511	0.227232	5.41404	0.900783
chr6:30277803-30293978	0.461352	7.10179	0.63583
chr6:30277855-30279709	-0.813099	5.4583	0.710583
chr6:30277992-30280173	-0.99298	4.57182	0.668408
chr6:30278103-30280388	0.862669	6.07358	0.563311
chr6:30278888-30280497	-2.61153	0.404291	0.206659
chr6:30279098-30280633	-0.870588	6.36896	0.612455
chr6:30279238-30281263	0.165182	4.83268	0.938248
chr6:30279247-30281860	-0.909288	3.65335	0.707112
chr6:30279259-30294684	-0.72315	10.3422	0.132138
chr6:30279537-30281305	-1.69877	5.45124	0.390827
chr6:30279708-30281510	0.369703	6.01127	0.803611
chr6:30279724-30282237	1.30246	2.41122	0.640912
chr6:30280159-30281810	0.909876	3.4716	0.737142
chr6:30280186-30282793	-0.478202	7.18044	0.636079
chr6:30280392-30282007	-0.79336	5.15765	0.722547
chr6:30280408-30283241	-1.69095	5.36575	0.409725
chr6:30280496-30282200	-1.36594	5.41638	0.545541
chr6:30280626-30282223	-0.685696	6.72616	0.563671
chr6:30280655-30283258	-1.30877	5.77671	0.577443
chr6:30280914-30282349	-0.663199	8.43785	0.261369
chr6:30281304-30282443	-1.66054	5.01759	0.408562
chr6:30281381-30284002	-0.62573	2.96958	0.805163
chr6:30281480-30282710	-0.989477	3.69465	0.708164
chr6:30281777-30282752	2.75618	0.326542	0.262448
chr6:30281803-30284105	1.55734	9.32006	0.00833814
chr6:30281878-30282991	-0.543025	4.43908	0.808461
chr6:30282051-30283233	-5.96058	2.62686	0.0311218
chr6:30282194-30283352	-2.812	4.68663	0.265707
chr6:30282232-30285382	-0.224455	5.14969	0.907457
chr6:30282328-30283568	-1.06642	7.38195	0.277277
chr6:30282444-30286599	-0.0190434	6.77738	0.985977
chr6:30282450-30283705	-1.23921	6.70399	0.246747
chr6:30282554-30283957	0.0854829	3.88237	0.975582
chr6:30282751-30283975	-0.127257	4.53854	0.956675
chr6:30282944-30284083	-0.837109	5.36156	0.636767
chr6:30283029-30289103	-0.08093	3.93491	0.976915
chr6:30283188-30284235	0.640008	2.90382	0.811232
chr6:30283246-30291436	6.17645	1.03916	0.112973
chr6:30283265-30295185	-6.27841	1.82138	0.0211622
chr6:30283351-30284403	0	0.215196	1
chr6:30283529-30285284	-2.22213	4.73872	0.30195
chr6:30283659-30285308	-6.01973	1.65417	0.0253386
chr6:30283714-30293060	1.08278	5.32018	0.585436
chr6:30283754-30285636	-0.810471	4.74584	0.696404
chr6:30283963-30285759	-1.02984	4.31233	0.695126
chr6:30284084-30293184	-1.36812	6.96679	0.149629
chr6:30284093-30285787	-0.111518	6.30961	0.946735
chr6:30284233-30286286	-6.89045	2.24987	0.0136595
chr6:30284287-30296071	-1.46182	3.85535	0.533502
chr6:30284366-30286577	-0.565217	7.79106	0.426356
chr6:30284459-30293581	0.144561	6.21342	0.93381
chr6:30284761-30286734	0.295383	2.41151	0.917761
chr6:30285299-30287434	1.62613	4.08899	0.540508
chr6:30285439-30287557	1.65564	2.41583	0.564433
chr6:30285644-30287738	-0.75115	6.89147	0.616375
chr6:30285746-30287762	-0.11022	7.76238	0.880079
chr6:30285953-30288743	-2.22973	3.89825	0.441498
chr6:30286576-30289014	-1.12012	6.32105	0.427575
chr6:30286577-30293985	0.446602	7.93055	0.533313
chr6:30286649-30297299	-0.0708933	6.59504	0.951593
chr6:30286733-30289644	0.131702	7.66119	0.862314
chr6:30287117-30289845	-1.88858	1.60661	0.468321
chr6:30287546-30290036	-0.47106	6.53085	0.786661
chr6:30287561-30294199	-0.382559	7.41333	0.643631
chr6:30287646-30290232	-0.916049	7.06155	0.324108
chr6:30287748-30290297	-3.16424	4.96941	0.187456
chr6:30288520-30291339	0.374595	7.84253	0.616494
chr6:30289026-30291400	-0.397944	7.94707	0.561465
chr6:30289493-30291806	-1.79964	4.60044	0.488099
chr6:30289734-30292263	-1.2772	3.87379	0.590291
chr6:30289992-30293012	0.00844895	3.5906	0.997181
chr6:30290101-30293056	-0.397097	6.11154	0.795913
chr6:30290296-30293152	3.80314	9.77481	9.23938e-07
chr6:30290411-30293259	-0.54545	6.98329	0.57358
chr6:30291344-30293514	-0.945168	6.88684	0.340844
chr6:30291409-30294662	-1.35602	6.71258	0.312685
chr6:30291787-30293775	0.715603	5.56064	0.689384
chr6:30291812-30295027	0.295269	4.2486	0.907015
chr6:30292258-30293934	-1.38262	4.3026	0.569991
chr6:30292764-30294044	-1.69778	4.84538	0.438941
chr6:30293012-30294168	-0.943819	7.93513	0.1618
chr6:30293156-30294302	0	0.215196	1
chr6:30293156-30295437	-6.20527	2.81905	0.0254868
chr6:30293255-30298702	-1.11379	5.42605	0.587836
chr6:30293258-30294627	-0.290515	5.09721	0.911381
chr6:30293513-30295006	-0.737737	6.0873	0.596001
chr6:30293575-30295998	1.63335	3.80724	0.549074
chr6:30293634-30295008	-0.334033	7.36893	0.692429
chr6:30293909-30295121	1.30499	3.93825	0.654241
chr6:30293959-30297162	-0.913029	5.17557	0.623797
chr6:30293977-30300012	-0.788619	6.29495	0.532886
chr6:30294043-30295330	0	0.215196	1
chr6:30294167-30295426	5.31718	1.92161	0.0993764
chr6:30294198-30297338	-0.878249	8.98994	0.101666
chr6:30294301-30295749	0.0343736	7.03064	0.971971
chr6:30294626-30295897	0.192855	2.59153	0.942284
chr6:30294642-30297574	0	0.215196	1
chr6:30294668-30303824	0.489796	5.00269	0.818752
chr6:30294878-30295962	-2.689	3.96797	0.241186
chr6:30295007-30296383	1.84789	4.1199	0.491766
chr6:30295026-30298241	-0.629399	4.6679	0.786876
chr6:30295116-30296721	0.31136	6.57413	0.800856
chr6:30295184-30307819	-0.169491	6.13099	0.902414
chr6:30295279-30296756	-1.30779	4.50082	0.575983
chr6:30295339-30298676	-9.32168	4.25009	0.0134136
chr6:30295434-30297083	0	0.215196	1
chr6:30295528-30297118	0.430101	4.61322	0.884694
chr6:30295825-30297261	0.211515	4.55759	0.931324
chr6:30295967-30299823	0	0.215196	1
chr6:30295973-30297395	1.65881	2.93362	0.564129
chr6:30296035-30309369	-0.579144	7.62349	0.437072
chr6:30296209-30297497	-0.0629497	9.20649	0.907772
chr6:30296572-30297620	-4.98389	1.08809	0.0506853
chr6:30296755-30297958	-0.900658	4.90664	0.651897
chr6:30297008-30298237	0.438431	6.05946	0.764668
chr6:30297114-30298516	0.745607	6.71165	0.520713
chr6:30297150-30300023	-0.315504	5.3385	0.884104
chr6:30297257-30298659	0	0.215196	1
chr6:30297292-30309389	0	0.215196	1
chr6:30297351-30302296	-0.681561	5.68278	0.670834
chr6:30297375-30299309	-0.334499	4.68395	0.877776
chr6:30297463-30299468	0	0.215196	1
chr6:30297573-30303545	-1.12798	7.23134	0.194359
chr6:30297582-30299749	-0.753805	6.62475	0.572797
chr6:30297929-30299832	-0.207011	6.04516	0.893799
chr6:30297962-30303810	0.827239	2.54727	0.760905
chr6:30298187-30300001	0.0905391	5.91248	0.952767
chr6:30298373-30300821	-1.41727	6.74338	0.175068
chr6:30298655-30300947	-1.65037	4.14438	0.529903
chr6:30298675-30307418	-1.10115	4.32025	0.681445
chr6:30298701-30310035	-0.569043	7.62481	0.444132
chr6:30298765-30301518	-0.293869	7.66521	0.69262
chr6:30299467-30301912	-0.503527	4.82527	0.807993
chr6:30299472-30307814	-0.144713	7.18615	0.874575
chr6:30299604-30301994	-1.20491	7.93525	0.0710651
chr6:30299816-30302290	-0.611003	5.58147	0.755328
chr6:30299907-30308102	-0.651595	7.65272	0.376073
chr6:30299956-30302602	0.18926	6.00135	0.907973
chr6:30300025-30310438	-0.611704	7.32991	0.517807
chr6:30300485-30302962	-0.934936	1.77446	0.718008
chr6:30300835-30303478	-0.937763	6.79414	0.394947
chr6:30301501-30303552	-0.488013	6.811	0.640737
chr6:30301521-30308358	-1.52113	5.25186	0.450363
chr6:30301634-30303772	1.32868	9.31274	0.0224858
chr6:30301947-30303886	-0.505683	5.39699	0.819012
chr6:30302295-30307274	-3.14285	4.38891	0.208108
chr6:30302453-30307301	-1.84169	4.19347	0.45884
chr6:30302755-30307403	-0.461796	8.22704	0.461281
chr6:30303001-30307630	0.3153	11.0932	0.515686
chr6:30303485-30307698	-0.177958	6.16152	0.929909
chr6:30303553-30309165	-1.82622	0.312878	0.312652
chr6:30303580-30311614	-3.1037	5.72515	0.0923266
chr6:30303712-30307775	-0.513388	7.64108	0.587419
chr6:30303809-30309333	-1.01234	4.6654	0.696493
chr6:30303868-30307965	-0.147347	4.58059	0.949699
chr6:30304288-30308092	-0.587405	7.0758	0.529757
chr6:30307307-30308305	-0.723118	8.07807	0.325855
chr6:30307361-30309538	7.78639	3.17896	0.0833938
chr6:30307397-30308649	0.0262607	6.65812	0.981661
chr6:30307537-30309100	-0.212601	4.07096	0.936047
chr6:30307634-30309106	-0.496118	4.65987	0.858039
chr6:30307743-30309848	0	0.215196	1
chr6:30307768-30309261	-1.11075	4.03228	0.647226
chr6:30307815-30313154	6.33093	1.11272	0.113117
chr6:30307921-30309376	-0.0949449	5.06232	0.961754
chr6:30308062-30309527	-0.235088	6.70596	0.83163
chr6:30308093-30310026	-0.285748	4.37201	0.900852
chr6:30308264-30309754	0	0.215196	1
chr6:30308360-30313377	0	0.215196	1
chr6:30308370-30310271	-0.73211	5.79232	0.634496
chr6:30308511-30309826	-2.31955	4.49029	0.383299
chr6:30308703-30309982	0.840818	6.04084	0.577853
chr6:30309101-30310125	-0.225717	7.27133	0.798561
chr6:30309113-30310578	-0.78956	6.1956	0.546887
chr6:30309237-30310250	0.496759	8.50806	0.421247
chr6:30309337-30310408	6.53926	2.55843	0.0777992
chr6:30309343-30310657	-1.12952	3.31472	0.681989
chr6:30309374-30314101	2.15316	5.26477	0.313846
chr6:30309532-30311394	-0.0841889	7.3629	0.921861
chr6:30309537-30310563	0	0.215196	1
chr6:30309723-30310669	0.441614	5.8864	0.801103
chr6:30309761-30311613	-0.59701	6.08231	0.736197
chr6:30309825-30310881	1.57095	2.28205	0.579283
chr6:30309882-30314722	-1.67004	5.07745	0.452859
chr6:30309975-30310990	0	0.215196	1
chr6:30310007-30311996	-3.02037	3.92604	0.260519
chr6:30310082-30311050	0.605246	6.63635	0.610965
chr6:30310243-30312639	-1.39096	5.34277	0.426134
chr6:30310244-30311391	3.71435	1.22421	0.292779
chr6:30310406-30311608	-6.53888	1.99831	0.0176073
chr6:30310431-30316049	0.269847	6.25183	0.841106
chr6:30310461-30313017	-1.21772	5.22041	0.562771
chr6:30310527-30311979	0	0.215196	1
chr6:30310657-30312391	-2.99019	3.75246	0.294267
chr6:30310670-30313086	-1.2307	5.77	0.451859
chr6:30310785-30312553	0	0.215196	1
chr6:30310936-30312715	3.76276	2.975	0.246296
chr6:30311055-30312835	-0.814197	5.94667	0.622873
chr6:30311127-30313364	-1.49986	5.25101	0.449461
chr6:30311392-30313002	-0.301768	3.14135	0.909855
chr6:30311465-30313518	-0.566866	6.7011	0.660914
chr6:30311517-30313141	-0.431453	5.59791	0.81431
chr6:30311600-30316674	0.617829	3.97758	0.806162
chr6:30311956-30313279	6.12848	2.56859	0.108233
chr6:30311980-30314062	-2.01741	4.23422	0.470427
chr6:30312327-30313386	0.322065	4.81546	0.905639
chr6:30312565-30313531	0.629657	3.57805	0.813884
chr6:30312577-30314276	0.140103	2.39775	0.960052
chr6:30312647-30319088	0	0.215196	1
chr6:30312692-30313641	0.00214001	7.32654	0.998039
chr6:30312782-30314585	0.887308	4.75921	0.693612
chr6:30312828-30313971	0	0.215196	1
chr6:30313001-30314048	0	0.215196	1
chr6:30313018-30314798	-1.00394	4.5541	0.657718
chr6:30313116-30314176	-1.63492	4.99677	0.453413
chr6:30313168-30321156	6.21727	2.18795	0.0729416
chr6:30313269-30314249	0.143057	6.08916	0.942691
chr6:30313295-30315549	0	0.215196	1
chr6:30313385-30314514	-0.717597	7.51992	0.357248
chr6:30313498-30314721	-0.783845	9.42616	0.130069
chr6:30313532-30316048	0	0.215196	1
chr6:30313612-30314864	0.509478	5.27224	0.815852
chr6:30313827-30315296	5.23616	1.86104	0.0985501
chr6:30314007-30315468	-0.456932	3.92546	0.853965
chr6:30314045-30316650	0.414663	5.08219	0.864869
chr6:30314074-30323318	-0.739608	6.37908	0.548639
chr6:30314138-30315476	-0.462582	3.85472	0.848572
chr6:30314236-30315955	-0.34948	4.90128	0.88998
chr6:30314267-30316668	0.697369	2.02397	0.804287
chr6:30314504-30316019	-4.86421	1.03325	0.0547466
chr6:30314535-30316893	-0.889935	4.59847	0.700329
chr6:30314580-30323492	-1.17239	4.43035	0.640712
chr6:30314711-30316134	0.516153	6.85796	0.630282
chr6:30314790-30319033	-2.08958	2.63129	0.397632
chr6:30314816-30316410	-1.31093	3.17717	0.648719
chr6:30314954-30316484	-0.443556	6.55766	0.702999
chr6:30315297-30316611	-1.97151	3.62177	0.422411
chr6:30315471-30316830	-0.863778	5.77562	0.669991
chr6:30315542-30319274	-2.39878	5.01689	0.343471
chr6:30315550-30325714	0.177753	5.47629	0.920802
chr6:30315607-30316883	0.651253	5.43206	0.726008
chr6:30315956-30317396	-2.48415	3.41648	0.301704
chr6:30316023-30319843	-0.697878	3.13106	0.791627
chr6:30316086-30317544	-1.3587	4.62918	0.558921
chr6:30316363-30318997	-5.10161	1.14163	0.0469613
chr6:30316411-30321103	-0.310375	7.11838	0.739036
chr6:30316482-30319001	-0.397408	6.4848	0.803859
chr6:30316608-30319118	-1.75257	6.18068	0.262838
chr6:30316663-30325737	-2.37924	2.98868	0.347662
chr6:30316667-30321405	-0.112329	4.74297	0.965837
chr6:30316704-30319211	-0.456461	4.62663	0.844416
chr6:30316831-30319822	-6.81796	3.70569	0.0120043
chr6:30316884-30322339	0.752376	4.7358	0.73686
chr6:30316939-30320539	0.976577	5.49064	0.697649
chr6:30317462-30320830	0.323658	6.55533	0.789158
chr6:30318908-30321011	0.379541	6.26115	0.82467
chr6:30319011-30321067	0.155889	7.02423	0.91415
chr6:30319031-30323315	5.93601	2.16384	0.0745882
chr6:30319034-30327171	-6.72415	2.12964	0.0154137
chr6:30319111-30321300	6.59741	1.25264	0.113551
chr6:30319201-30321345	-0.930141	5.67469	0.632921
chr6:30319249-30323490	0	0.215196	1
chr6:30319831-30322335	-0.590445	3.79746	0.808707
chr6:30319838-30324796	0	0.215196	1
chr6:30320077-30322340	-1.08224	4.21585	0.711633
chr6:30320685-30322709	-0.905719	5.14605	0.631301
chr6:30320837-30322989	0	0.215196	1
chr6:30321047-30323103	0.802721	3.60125	0.765129
chr6:30321067-30325570	-1.49329	5.20161	0.538244
chr6:30321154-30327310	-0.268246	4.72825	0.910595
chr6:30321203-30323178	-0.76065	8.13796	0.233032
chr6:30321300-30323266	1.02973	6.01034	0.505603
chr6:30321301-30325793	-5.08614	2.32282	0.0600529
chr6:30321457-30323436	-0.911905	4.32572	0.703114
chr6:30322336-30324240	-1.17403	6.44968	0.456656
chr6:30322341-30325985	-0.0267156	6.19826	0.984268
chr6:30322376-30328170	0	0.215196	1
chr6:30322553-30324484	0.160214	3.95484	0.950267
chr6:30322868-30324699	-0.0377109	5.25565	0.984057
chr6:30322990-30324792	0.0771083	4.92015	0.973194
chr6:30323130-30324915	-1.21833	4.10622	0.636803
chr6:30323202-30326269	-0.22299	7.08022	0.814612
chr6:30323244-30325548	3.88472	0.431504	0.159211
chr6:30323417-30325535	-0.960011	7.8446	0.48352
chr6:30323424-30327155	-0.315233	6.96295	0.748473
chr6:30323491-30331223	0.236432	5.15726	0.91264
chr6:30323555-30325712	-0.598367	4.50864	0.804219
chr6:30324418-30325862	0.705206	6.19365	0.699158
chr6:30324579-30325954	-0.368008	4.80853	0.886869
chr6:30324704-30326181	-0.669623	6.26271	0.665426
chr6:30324793-30327482	-0.649174	2.50915	0.805833
chr6:30324797-30331624	0.49319	2.35928	0.854493
chr6:30324908-30326256	-0.683131	3.58245	0.813642
chr6:30325364-30327082	5.53511	2.08864	0.101666
chr6:30325549-30327107	-0.00456301	5.62807	0.997857
chr6:30325550-30327809	-0.616642	6.41451	0.739211
chr6:30325710-30327303	-0.763347	7.30071	0.371119
chr6:30325720-30332632	2.61155	7.83102	0.00196005
chr6:30325756-30328169	-2.03239	4.52457	0.345764
chr6:30325849-30327457	-0.441809	8.03837	0.507584
chr6:30325953-30327560	2.89273	8.57685	5.79374e-05
chr6:30325984-30331111	0	0.215196	1
chr6:30326136-30327680	6.74458	3.09316	0.114365
chr6:30326234-30331441	0.941321	3.55824	0.725724
chr6:30326266-30327806	-0.73856	7.30335	0.387212
chr6:30326303-30332668	0.169483	4.84832	0.936149
chr6:30326847-30328137	0.799203	6.10532	0.7038
chr6:30327106-30328235	-0.765996	9.46015	0.138142
chr6:30327156-30331961	-0.829796	7.92238	0.260608
chr6:30327276-30329093	2.22989	1.52581	0.467842
chr6:30327295-30333443	5.19378	1.82971	0.0981241
chr6:30327366-30331967	-8.56682	3.59787	0.0148193
chr6:30327441-30329744	0	0.215196	1
chr6:30327541-30330119	0.442672	4.50408	0.8656
chr6:30327650-30330224	-0.449586	7.4041	0.688856
chr6:30327696-30332626	-0.765336	5.991	0.692756
chr6:30327785-30330929	0.066603	6.16673	0.970499
chr6:30327828-30333854	-1.75602	4.90807	0.498357
chr6:30328122-30331050	4.9674	0.625258	0.11501
chr6:30328141-30333192	-1.80036	4.6465	0.41725
chr6:30328248-30331222	-1.3857	4.76083	0.576999
chr6:30328368-30331426	-0.820653	5.02607	0.67226
chr6:30329463-30331619	-0.256485	5.96727	0.879645
chr6:30329749-30331952	-0.953448	7.24648	0.469178
chr6:30330129-30332044	-0.378177	6.38421	0.761966
chr6:30330313-30332572	0.049531	4.2219	0.984776
chr6:30331062-30332681	-2.10096	3.39818	0.406955
chr6:30331076-30333420	0.47949	4.78882	0.848846
chr6:30331113-30335319	0.237275	7.01068	0.874852
chr6:30331197-30332969	-0.0939964	8.16207	0.90171
chr6:30331405-30333139	-0.111355	3.99494	0.965198
chr6:30331442-30333577	-0.284571	5.79346	0.855616
chr6:30331605-30333307	-0.562729	2.87257	0.825028
chr6:30331620-30341162	1.06811	4.31788	0.709207
chr6:30331643-30333818	-6.0225	1.65469	0.025291
chr6:30331924-30333396	-0.668596	7.51138	0.419554
chr6:30331966-30335169	-0.0868072	3.69286	0.972299
chr6:30332043-30333529	0	0.215196	1
chr6:30332127-30343308	0	0.215196	1
chr6:30332571-30333669	-0.762848	8.24246	0.448029
chr6:30332616-30335414	0.684823	6.0396	0.697935
chr6:30332643-30346102	-2.19204	3.76843	0.374468
chr6:30332657-30333815	-0.368842	5.45007	0.833992
chr6:30332956-30333988	-0.238087	5.84554	0.876934
chr6:30333051-30338104	-2.51433	4.33815	0.285527
chr6:30333100-30334112	-1.2074	4.22786	0.618394
chr6:30333193-30346283	0	0.215196	1
chr6:30333274-30334754	-1.09451	5.13695	0.557254
chr6:30333316-30339327	1.14508	6.82704	0.469498
chr6:30333383-30335146	-0.722056	4.78658	0.726134
chr6:30333510-30335257	-5.84049	1.54322	0.0286628
chr6:30333556-30339334	-1.02348	5.70124	0.517012
chr6:30333630-30335390	0.446288	3.63056	0.865064
chr6:30333781-30337619	-0.901452	3.16879	0.717056
chr6:30333816-30341144	-0.622394	3.67366	0.813328
chr6:30333823-30347395	0	0.215196	1
chr6:30333950-30337917	1.41419	3.46583	0.637997
chr6:30334107-30338004	-0.36124	7.13725	0.695563
chr6:30334316-30338103	-1.30598	5.89747	0.422319
chr6:30335145-30338374	0	0.215196	1
chr6:30335156-30342929	5.35597	1.95091	0.0997774
chr6:30335269-30338409	-0.240699	5.615	0.885613
chr6:30335308-30357836	0	0.215196	1
chr6:30335398-30339292	-4.98277	1.08797	0.0507207
chr6:30335406-30343231	-0.819228	4.52852	0.740597
chr6:30335702-30339493	0	0.215196	1
chr6:30337833-30339539	-0.661333	5.15706	0.725503
chr6:30337975-30340698	0.325844	5.29236	0.86383
chr6:30337996-30343520	-0.634979	7.33168	0.453517
chr6:30338089-30340898	-0.173746	2.79315	0.946921
chr6:30338099-30359906	-1.18445	5.63905	0.459556
chr6:30338236-30341070	-1.83408	0.313012	0.311673
chr6:30338382-30341958	-5.63145	1.4217	0.0330374
chr6:30338432-30344190	0.948353	2.54387	0.730656
chr6:30339299-30342751	-1.0277	3.62515	0.688902
chr6:30339328-30344455	0	0.215196	1
chr6:30339396-30342836	-0.519401	7.10423	0.575587
chr6:30339524-30343160	-0.436366	5.14353	0.819483
chr6:30340471-30343290	-1.26157	7.03817	0.174563
chr6:30340714-30343413	0.283062	5.24787	0.884459
chr6:30341068-30343496	0	0.215196	1
chr6:30341141-30346043	1.79712	4.93011	0.430491
chr6:30341957-30343664	0	0.215196	1
chr6:30342622-30344073	-0.306699	7.66264	0.68457
chr6:30342831-30344105	-0.53983	4.21428	0.819983
chr6:30342920-30346081	0	0.215196	1
chr6:30343149-30344425	-0.242749	4.2752	0.922199
chr6:30343228-30346282	-1.67115	1.48914	0.521495
chr6:30343279-30344679	6.05884	2.15049	0.0729885
chr6:30343280-30365281	0.226654	4.04813	0.927873
chr6:30343372-30344869	-2.61153	0.404291	0.206659
chr6:30343490-30345016	-0.88011	4.36018	0.694276
chr6:30343497-30347274	-2.19348	5.79067	0.141962
chr6:30343605-30345151	-0.891744	7.43924	0.266553
chr6:30343890-30345415	-0.695559	5.84007	0.710418
chr6:30344097-30346041	0.899273	3.55587	0.736031
chr6:30344181-30348022	-6.07414	1.68907	0.0244016
chr6:30344412-30346233	0	0.215196	1
chr6:30344459-30348772	0	0.215196	1
chr6:30344464-30365909	-0.781163	6.02216	0.695152
chr6:30344653-30346749	-1.46765	6.35989	0.342832
chr6:30344857-30347212	0.994132	8.00402	0.169596
chr6:30344920-30349414	-5.09749	1.14116	0.0470841
chr6:30345020-30347219	-1.37589	5.94251	0.45428
chr6:30345125-30347321	-0.983335	9.22523	0.0602485
chr6:30345302-30347446	0	0.215196	1
chr6:30346027-30347792	-7.00773	2.3379	0.0125362
chr6:30346070-30349764	-0.243196	4.69	0.910826
chr6:30346234-30370970	-1.25376	4.02716	0.601824
chr6:30346245-30348006	0	0.215196	1
chr6:30346296-30350711	-0.949454	6.49014	0.419454
chr6:30346331-30348114	-7.36342	2.60934	0.0111967
chr6:30347085-30348506	-0.427423	7.17831	0.638558
chr6:30347211-30348727	-0.443278	8.29315	0.470331
chr6:30347258-30350739	-1.39926	7.66205	0.051051
chr6:30347332-30349183	-1.76307	4.31347	0.480104
chr6:30347382-30371027	-0.951494	3.17894	0.729748
chr6:30347445-30349396	0	0.215196	1
chr6:30347488-30357687	0.00206299	5.49317	0.999158
chr6:30347796-30349732	-0.0149718	5.34681	0.994318
chr6:30348010-30349870	1.22727	4.3583	0.621102
chr6:30348041-30357683	-0.147043	5.94731	0.932898
chr6:30348102-30350710	-0.246965	7.76121	0.733618
chr6:30348232-30351538	-0.607691	6.91077	0.641992
chr6:30348736-30356829	0	0.215196	1
chr6:30348759-30359167	-1.704	4.27333	0.483244
chr6:30349098-30357213	0.589715	7.56303	0.467983
chr6:30349350-30357539	0	0.215196	1
chr6:30349418-30359206	-1.16701	5.80859	0.438055
chr6:30349676-30357683	0	0.215196	1
chr6:30349774-30359808	0	0.215196	1
chr6:30349798-30357792	-3.78069	0.646864	0.106692
chr6:30350679-30358541	-1.22139	6.68838	0.260772
chr6:30350735-30361373	-0.229237	5.87748	0.895582
chr6:30351271-30358873	-0.565002	4.80289	0.785533
chr6:30354381-30359029	-0.968784	8.00693	0.224254
chr6:30357194-30359150	0.634021	6.26937	0.642393
chr6:30357249-30362150	-2.85338	5.20668	0.208161
chr6:30357418-30359416	0.739567	6.57038	0.697813
chr6:30357682-30359638	6.71411	1.31935	0.113815
chr6:30357693-30364004	0	0.215196	1
chr6:30357749-30383303	-0.39738	6.16899	0.83635
chr6:30357801-30359737	-1.29991	6.31914	0.294099
chr6:30357897-30364616	-0.966672	6.69801	0.371075
chr6:30358035-30359846	-0.404737	5.87445	0.807243
chr6:30358623-30361091	0	0.215196	1
chr6:30358949-30361172	-0.480633	5.2131	0.813127
chr6:30359115-30361354	-0.690097	9.13335	0.194558
chr6:30359196-30364795	-1.57256	3.75762	0.505334
chr6:30359363-30362107	-0.252636	4.89963	0.928406
chr6:30359490-30362147	-1.0738	6.8865	0.277737
chr6:30359724-30362388	1.02465	9.06406	0.0789912
chr6:30359780-30365266	0	0.215196	1
chr6:30359845-30362691	-1.74397	7.78894	0.0113523
chr6:30359864-30383333	-1.82986	4.1125	0.458339
chr6:30360129-30362714	-0.0935307	5.94454	0.957893
chr6:30361119-30363004	-1.19573	6.26718	0.460453
chr6:30361334-30363044	-0.447959	9.15053	0.488509
chr6:30361373-30365804	0.116711	4.67513	0.962562
chr6:30361960-30363562	-0.43658	6.11354	0.751352
chr6:30362133-30363773	0.0125093	6.03987	0.99311
chr6:30362134-30365921	-0.972402	7.93598	0.148693
chr6:30362341-30364010	-0.685412	7.81034	0.331193
chr6:30362438-30368620	0.691266	6.09259	0.712655
chr6:30362502-30364288	-0.979804	9.31387	0.0590781
chr6:30362713-30364542	6.60131	2.13332	0.0732901
chr6:30362882-30364788	-0.573132	3.57802	0.817771
chr6:30363040-30365118	-0.372897	6.96693	0.703406
chr6:30363489-30365236	-0.530216	6.06519	0.746168
chr6:30363650-30365535	-6.72483	2.12982	0.0154062
chr6:30363942-30365608	-2.16539	6.41217	0.275833
chr6:30364205-30365745	-1.49696	4.80072	0.456759
chr6:30364541-30365829	-2.23868	4.35786	0.314468
chr6:30364592-30368620	-0.933046	3.71732	0.705817
chr6:30364616-30383848	-0.787052	7.01858	0.406419
chr6:30364746-30366207	0.573825	5.41745	0.757401
chr6:30364789-30370916	1.96554	2.96418	0.54793
chr6:30365082-30368538	1.90432	4.27357	0.469431
chr6:30365215-30368588	-0.991909	7.39396	0.482374
chr6:30365238-30371412	-0.3626	6.09764	0.843059
chr6:30365273-30388053	-1.23558	5.10852	0.577652
chr6:30365500-30368859	0	0.215196	1
chr6:30365550-30373214	1.12657	6.70148	0.344915
chr6:30365604-30369312	-0.797771	7.21316	0.366234
chr6:30365724-30370308	0.0977551	6.185	0.943111
chr6:30365840-30370685	-0.440792	5.62182	0.844167
chr6:30365856-30374103	-1.83652	4.37508	0.437168
chr6:30366202-30381879	6.28437	1.78477	0.0709382
chr6:30366206-30370830	-0.612962	7.58105	0.649963
chr6:30367363-30370969	4.47776	4.05385	0.158659
chr6:30368585-30371408	1.81559	3.85341	0.506314
chr6:30368621-30391789	0.0212866	6.90434	0.983388
chr6:30368627-30383275	6.36069	2.50264	0.0650457
chr6:30368744-30371853	0.013534	8.6071	0.981789
chr6:30368887-30372060	-0.467099	4.93984	0.833937
chr6:30369405-30372164	-2.19944	2.52658	0.40818
chr6:30370545-30372249	-0.0763687	6.83497	0.959254
chr6:30370833-30372525	-0.881888	3.46297	0.721892
chr6:30370851-30383290	1.76673	2.00719	0.561439
chr6:30370965-30373002	0.38994	5.89729	0.857607
chr6:30370971-30406984	-1.95466	5.09972	0.407256
chr6:30371335-30373198	-0.464696	7.08971	0.61963
chr6:30371409-30383770	-0.614632	4.65817	0.774098
chr6:30371782-30373730	-1.05813	7.88949	0.121906
chr6:30371874-30373892	-4.42264	0.853579	0.0723312
chr6:30372061-30374041	-0.677153	4.17902	0.786652
chr6:30372183-30375735	-0.472344	7.54913	0.542869
chr6:30372491-30377191	1.27895	4.71094	0.601704
chr6:30372538-30383997	-0.399534	7.49392	0.616581
chr6:30372779-30377375	0	0.215196	1
chr6:30373201-30377414	-0.193224	4.39822	0.942264
chr6:30373726-30377726	5.23616	1.86104	0.0985501
chr6:30373885-30378986	-1.10683	3.27384	0.655465
chr6:30374040-30380397	4.60264	10.7182	4.06309e-07
chr6:30374097-30384986	-6.72313	2.12936	0.0154249
chr6:30374110-30407445	0	0.215196	1
chr6:30374690-30381861	-2.93055	4.12741	0.220041
chr6:30376387-30382542	-0.0486394	6.63765	0.980006
chr6:30377264-30382864	-0.608296	6.72199	0.573402
chr6:30377413-30382993	-1.90522	3.43222	0.449095
chr6:30377495-30385146	0.220053	6.33277	0.86628
chr6:30377538-30383207	0.262509	4.70299	0.908759
chr6:30377926-30383274	-0.147342	2.9354	0.95499
chr6:30379473-30383463	0	0.215196	1
chr6:30381859-30383674	0.0429562	6.87123	0.967091
chr6:30382405-30383665	-0.30334	5.18708	0.899875
chr6:30382855-30383780	-0.999636	2.25197	0.696843
chr6:30382963-30383913	0.397331	7.19271	0.672086
chr6:30382994-30385827	0.820921	6.11747	0.575139
chr6:30383069-30384028	0.809267	5.05271	0.697713
chr6:30383271-30384327	-0.50791	7.0942	0.727415
chr6:30383282-30386385	-0.170139	5.44251	0.923744
chr6:30383332-30408067	-0.960438	5.46873	0.615139
chr6:30383406-30384422	-0.932854	5.01946	0.630288
chr6:30383535-30384738	3.71383	7.62065	0.000234519
chr6:30383661-30384999	0.0384505	5.61296	0.981927
chr6:30383768-30386605	1.3733	4.39133	0.643902
chr6:30383779-30385133	-0.952699	6.57831	0.400985
chr6:30383834-30409066	0.584384	5.39561	0.821803
chr6:30383893-30385427	-1.76244	4.64293	0.470996
chr6:30383996-30386951	-0.953724	3.19573	0.712894
chr6:30384032-30385448	-0.159321	7.61778	0.833943
chr6:30384152-30385592	-1.87993	4.577	0.469559
chr6:30384321-30385801	-1.16909	5.68842	0.622473
chr6:30384415-30387430	-0.570267	8.68982	0.317039
chr6:30384628-30386012	-0.729147	8.12321	0.255068
chr6:30384956-30386349	-2.19174	4.79487	0.348541
chr6:30385000-30387768	-0.195206	4.50481	0.935204
chr6:30385103-30386524	-1.16746	3.21746	0.638161
chr6:30385152-30410909	0	0.215196	1
chr6:30385279-30386784	-6.23274	1.79008	0.0218505
chr6:30385459-30386950	1.15637	1.27157	0.681465
chr6:30385578-30388021	0.00840778	8.48691	0.988899
chr6:30385585-30386997	-0.712841	8.15342	0.261803
chr6:30385762-30387250	0.360801	6.26815	0.788422
chr6:30385833-30391753	-4.22177	5.09472	0.0672262
chr6:30385925-30387438	-1.10621	6.61471	0.321117
chr6:30386348-30387767	-0.617521	3.9625	0.796264
chr6:30386412-30406183	-0.0169245	4.36056	0.994234
chr6:30386537-30388014	-0.654811	6.01902	0.754138
chr6:30386632-30406937	-1.08231	6.17339	0.513699
chr6:30386783-30388005	-0.646065	6.91315	0.513774
chr6:30386903-30388517	0.238852	5.23644	0.900947
chr6:30387011-30389097	0.159729	5.35814	0.933767
chr6:30387016-30406947	0.228821	5.15265	0.91315
chr6:30387223-30389433	-0.471577	5.44908	0.803498
chr6:30387405-30389788	-0.620026	5.98941	0.667363
chr6:30387462-30407434	0.636913	6.63707	0.730012
chr6:30387766-30390356	-0.786959	6.9331	0.421076
chr6:30387913-30391741	-1.39546	3.00699	0.59877
chr6:30388016-30392146	-2.16453	6.27743	0.190177
chr6:30388020-30408063	7.78304	3.24364	0.0837021
chr6:30388057-30412111	-3.44733	3.48929	0.153375
chr6:30388506-30392152	-3.37254	5.97733	0.103677
chr6:30389048-30397321	2.0851	4.59027	0.510696
chr6:30389429-30397605	-2.34761	4.83483	0.235215
chr6:30389775-30397663	0.0691753	4.11965	0.977543
chr6:30390281-30397798	-1.73412	4.46542	0.505163
chr6:30391721-30406169	2.79984	3.63533	0.364271
chr6:30391747-30408992	0.0623112	4.93705	0.981617
chr6:30391777-30412126	-0.335179	5.2672	0.882921
chr6:30391826-30406532	-0.567613	5.83187	0.709647
chr6:30392151-30406607	-8.67067	3.68633	0.0148183
chr6:30392208-30409022	-1.13096	4.76927	0.651808
chr6:30392871-30406653	0.127563	5.84816	0.941618
chr6:30397459-30406903	-1.28759	6.88126	0.439502
chr6:30397627-30407103	-0.0746214	6.10937	0.962962
chr6:30397794-30407360	0.560955	6.07594	0.70224
chr6:30406160-30407792	-0.730654	7.29788	0.394485
chr6:30406344-30407878	0.59137	4.03362	0.813435
chr6:30406560-30408035	0.0207764	5.84448	0.989358
chr6:30406664-30408154	0	0.215196	1
chr6:30406702-30410546	5.30472	0.715235	0.113784
chr6:30406890-30408295	-1.33331	5.36778	0.470001
chr6:30406924-30410905	-0.43893	4.2048	0.862685
chr6:30406986-30414074	-0.909406	7.00346	0.546096
chr6:30407097-30408657	-7.36144	2.60864	0.0112379
chr6:30407340-30408986	-0.597288	5.52856	0.77799
chr6:30407432-30411262	-0.535588	6.75773	0.680084
chr6:30407662-30408991	2.50915	9.25086	0.000538061
chr6:30407859-30409235	-7.22119	2.49955	0.0107117
chr6:30407999-30410116	-0.608474	5.87433	0.685498
chr6:30408059-30412091	0.23566	5.09065	0.911499
chr6:30408064-30415238	0.857026	4.74198	0.749337
chr6:30408104-30410298	-0.0367885	6.6387	0.97446
chr6:30408285-30410411	4.57164	7.56953	0.000226541
chr6:30408309-30412374	0.381662	2.52309	0.886399
chr6:30408515-30410457	0.0120206	8.39573	0.984352
chr6:30408760-30410584	0	0.215196	1
chr6:30408975-30410853	1.19022	4.07867	0.67962
chr6:30409021-30413301	0	0.215196	1
chr6:30409033-30415799	-2.28441	4.80423	0.329369
chr6:30409121-30411122	0.748675	4.1987	0.78605
chr6:30409788-30411259	-0.855759	8.42799	0.145301
chr6:30410120-30412030	0.0433492	5.26031	0.983325
chr6:30410305-30412198	-1.95705	4.91288	0.344566
chr6:30410455-30412319	-0.78241	8.45818	0.182769
chr6:30410515-30413963	-1.0854	5.18519	0.629811
chr6:30410581-30412429	0.0317893	4.34545	0.989087
chr6:30410600-30418578	-0.587426	3.87925	0.810885
chr6:30410839-30412980	-1.20643	6.52635	0.43414
chr6:30410870-30414861	0	0.215196	1
chr6:30411058-30413245	-2.40493	1.88536	0.334834
chr6:30411122-30414872	2.55766	5.64692	0.18913
chr6:30411250-30413502	-0.974119	8.11497	0.126568
chr6:30411263-30418584	-1.58391	5.74522	0.334222
chr6:30412029-30413956	-0.113504	7.38053	0.893636
chr6:30412059-30415175	-0.921136	6.2165	0.478458
chr6:30412114-30419223	-0.886104	6.58713	0.524537
chr6:30412188-30414038	6.58787	1.94255	0.0730009
chr6:30412276-30414178	-0.644694	7.01662	0.498619
chr6:30412373-30415629	0.284048	5.20263	0.902548
chr6:30412425-30414406	0.56597	6.39476	0.663766
chr6:30412952-30414628	-6.53927	1.9984	0.0176025
chr6:30413190-30414734	-6.32537	1.85256	0.0204759
chr6:30413282-30416249	0.510732	5.00995	0.805017
chr6:30413465-30414860	-0.821112	6.62137	0.463448
chr6:30413908-30415142	-2.17383	6.20608	0.0866357
chr6:30413966-30421108	0.932053	4.25677	0.739153
chr6:30413971-30416504	-7.06555	2.38062	0.0120153
chr6:30414011-30415182	-1.29859	7.06729	0.157806
chr6:30414115-30415607	-1.56387	3.82272	0.503027
chr6:30414195-30417411	0.171604	8.44551	0.779376
chr6:30414299-30415746	9.54433	7.81491	9.0079e-07
chr6:30414542-30416193	-1.60303	4.69449	0.465796
chr6:30414708-30416223	-1.56044	5.30762	0.403165
chr6:30414847-30416402	-1.1529	5.3024	0.627662
chr6:30414862-30418564	2.04944	5.45104	0.307732
chr6:30414902-30421119	-0.326395	7.50289	0.805331
chr6:30414978-30416669	0.142873	6.59073	0.930025
chr6:30415179-30416986	-2.1291	5.18302	0.286194
chr6:30415183-30418857	-0.848913	8.36327	0.153653
chr6:30415585-30417370	-8.88022	3.86659	0.0146221
chr6:30415600-30419221	1.15881	6.3813	0.438161
chr6:30415723-30417510	0.307364	5.48797	0.865112
chr6:30415798-30428364	0.00623586	5.55881	0.99712
chr6:30415819-30419570	3.41751	4.58375	0.211745
chr6:30416007-30417852	-4.72841	0.975641	0.0596961
chr6:30416222-30418426	-0.77902	5.81726	0.60928
chr6:30416286-30419661	-1.01504	3.33451	0.698748
chr6:30416392-30418540	0.684656	4.15433	0.784138
chr6:30416588-30418650	7.18736	3.26472	0.0870113
chr6:30416782-30418814	-0.269493	4.92518	0.918353
chr6:30417365-30418988	0.554511	5.09915	0.795121
chr6:30417394-30419895	0.646991	5.76084	0.696444
chr6:30417509-30419031	-0.065786	4.86933	0.975784
chr6:30417516-30428915	2.6727	4.44043	0.383484
chr6:30417727-30419220	0.57317	3.6319	0.825341
chr6:30418178-30419542	0.034426	5.32795	0.989304
chr6:30418495-30419567	0.831469	6.29974	0.587588
chr6:30418562-30420959	-3.78805	0.647248	0.106259
chr6:30418570-30433494	-5.62929	1.42137	0.0330847
chr6:30418632-30419673	-0.571263	5.10925	0.781579
chr6:30418789-30419865	-0.0122711	5.87014	0.995631
chr6:30418844-30420983	-0.753133	6.83391	0.462703
chr6:30418875-30419980	0.145384	5.03844	0.942395
chr6:30418989-30420357	-0.358853	4.65722	0.88186
chr6:30419043-30421157	-0.120407	5.30255	0.948264
chr6:30419219-30420494	-0.747539	4.15332	0.747394
chr6:30419222-30433526	0.837749	5.3144	0.716919
chr6:30419263-30421512	0.354678	5.67581	0.860545
chr6:30419364-30420584	0	0.215196	1
chr6:30419553-30420773	-0.00732224	5.63982	0.99651
chr6:30419647-30428107	-0.252871	3.92481	0.916996
chr6:30419670-30420937	-0.278952	4.89334	0.920842
chr6:30419754-30434299	-0.728687	1.83238	0.77559
chr6:30419835-30421121	-0.375872	7.41213	0.650205
chr6:30419894-30428269	-1.72017	6.01109	0.276853
chr6:30419927-30421247	0.770864	5.68838	0.653123
chr6:30420287-30421470	0.661701	5.17999	0.740553
chr6:30420404-30421571	-0.587598	8.86358	0.288305
chr6:30420549-30421683	-3.43306	2.63229	0.188062
chr6:30420593-30428875	0.40245	4.76111	0.881809
chr6:30420772-30423596	-1.04902	6.1952	0.552762
chr6:30420913-30423828	-1.31744	3.32335	0.631554
chr6:30420949-30431203	3.3613	3.26056	0.295037
chr6:30421112-30435383	-1.5483	6.47487	0.182372
chr6:30421120-30424981	0.317246	3.18402	0.905429
chr6:30421156-30431790	-1.47512	5.60453	0.360834
chr6:30421236-30425491	0	0.215196	1
chr6:30421419-30425910	-2.31203	5.50989	0.234933
chr6:30421471-30432250	-0.340592	3.63074	0.902474
chr6:30421568-30426392	3.72369	8.03818	0.000126923
chr6:30421660-30427461	-0.429395	3.76202	0.862596
chr6:30421693-30432525	6.27459	2.69126	0.10988
chr6:30422996-30428042	-1.44031	8.07205	0.0475417
chr6:30423597-30428102	-0.972453	4.71288	0.680409
chr6:30424699-30428244	0	0.215196	1
chr6:30424990-30428325	-0.778767	5.06214	0.684962
chr6:30425880-30428601	1.71207	7.11844	0.330143
chr6:30426023-30428789	2.99635	7.11227	0.00837744
chr6:30426853-30428856	0	0.215196	1
chr6:30427889-30429000	-0.578289	7.23845	0.513242
chr6:30428101-30430019	-1.76693	4.8783	0.466756
chr6:30428201-30430703	-0.946877	6.06041	0.492067
chr6:30428245-30433273	0	0.215196	1
chr6:30428288-30430957	-3.9105	3.94113	0.106672
chr6:30428329-30448294	-1.31241	2.63733	0.608386
chr6:30428470-30430978	-5.43212	2.72638	0.0436827
chr6:30428723-30431122	-1.90087	3.51509	0.482652
chr6:30428849-30431270	0	0.215196	1
chr6:30428874-30433482	-1.30463	7.20605	0.304523
chr6:30428881-30448936	-1.36175	2.02076	0.59574
chr6:30428971-30431527	-0.822467	4.85016	0.686337
chr6:30429599-30431691	-0.554517	6.08779	0.688853
chr6:30430688-30431750	-0.163349	3.8951	0.948462
chr6:30430833-30431983	0.6949	8.55147	0.262441
chr6:30430977-30432153	1.91385	4.9149	0.407131
chr6:30431072-30433800	-1.94831	4.34216	0.487817
chr6:30431118-30432415	-1.59489	5.82865	0.280902
chr6:30431235-30432523	0	0.215196	1
chr6:30431321-30434076	0	0.215196	1
chr6:30431378-30432688	0.44509	6.30522	0.751859
chr6:30431555-30433040	-0.279259	4.24019	0.928048
chr6:30431707-30433071	-0.738122	8.18029	0.241193
chr6:30431982-30433208	0	0.215196	1
chr6:30432021-30434301	-1.25096	4.24978	0.60631
chr6:30432144-30433315	-0.848358	6.31816	0.49879
chr6:30432407-30433435	-0.210926	6.05608	0.889552
chr6:30432420-30434543	0.655785	4.98286	0.755239
chr6:30432498-30433739	-1.45124	4.92082	0.457413
chr6:30432607-30449470	0.360764	4.07352	0.904848
chr6:30432612-30433769	-3.36708	3.90994	0.166007
chr6:30432906-30433910	-1.12949	6.44689	0.429223
chr6:30433041-30434012	-0.196395	5.78396	0.901014
chr6:30433108-30435183	0	0.215196	1
chr6:30433207-30434114	-1.64345	2.13216	0.538745
chr6:30433328-30434250	1.20032	3.04944	0.665684
chr6:30433412-30435396	0	0.215196	1
chr6:30433428-30434474	-1.06282	6.92162	0.544315
chr6:30433503-30457248	0.374984	6.05536	0.798006
chr6:30433533-30434587	-0.423584	7.72326	0.56083
chr6:30433751-30434909	-0.337007	5.08811	0.89813
chr6:30433810-30437774	1.6574	4.98984	0.552096
chr6:30433882-30435112	-0.376964	6.27944	0.770575
chr6:30434011-30435318	-1.06186	6.87842	0.284557
chr6:30434052-30448260	-1.99708	2.6313	0.419112
chr6:30434128-30435502	-0.818838	4.23585	0.720497
chr6:30434228-30435770	0	0.215196	1
chr6:30434257-30448659	-0.324021	4.4928	0.900526
chr6:30434308-30457256	-3.67976	3.72465	0.163058
chr6:30434459-30436687	0.265862	10.0686	0.60528
chr6:30434528-30448847	-1.88581	1.51825	0.489299
chr6:30434595-30437681	-1.72221	5.22532	0.374069
chr6:30434908-30437771	-1.14151	7.01694	0.223086
chr6:30435101-30438632	0.942359	3.54095	0.725401
chr6:30435166-30449331	5.67285	1.73388	0.0783351
chr6:30435305-30457956	0	0.215196	1
chr6:30435310-30439408	-0.500524	4.52157	0.842698
chr6:30435395-30449554	-0.551129	4.96764	0.830763
chr6:30435501-30444339	-0.143806	6.91765	0.886562
chr6:30435752-30447728	-0.489709	4.38439	0.83341
chr6:30435781-30449880	-0.248946	5.77755	0.901306
chr6:30436065-30447753	-0.263329	3.60722	0.91943
chr6:30436675-30447966	0	0.215196	1
chr6:30437684-30448254	1.10729	6.73527	0.413512
chr6:30437997-30448480	2.57079	8.95859	8.14831e-05
chr6:30438886-30448610	-2.77867	4.90881	0.241505
chr6:30439442-30448808	-0.296257	4.94382	0.903685
chr6:30447466-30448907	-8.54734	3.58126	0.0148187
chr6:30447715-30449287	-0.834614	5.11473	0.659322
chr6:30447947-30449416	-0.975304	7.51871	0.218167
chr6:30448233-30449466	-1.11576	5.83618	0.45489
chr6:30448254-30452509	-0.0428556	6.47155	0.972101
chr6:30448304-30458519	0.266387	2.21026	0.920917
chr6:30448415-30449635	-0.22365	8.6673	0.700483
chr6:30448481-30455683	-0.559782	5.87933	0.733636
chr6:30448569-30449775	-1.09385	5.62889	0.613261
chr6:30448751-30449877	-0.0816146	5.10566	0.970477
chr6:30448800-30455684	1.74775	1.97856	0.539772
chr6:30448905-30450629	-0.456863	6.79407	0.664584
chr6:30448905-30462292	-0.19975	3.71939	0.938184
chr6:30449246-30451280	-0.828223	8.79414	0.135964
chr6:30449301-30455900	-5.03547	2.75806	0.0566514
chr6:30449372-30451297	-0.542125	7.66649	0.461293
chr6:30449469-30464278	-0.677606	6.66724	0.664568
chr6:30449477-30451667	-0.168796	1.60731	0.948499
chr6:30449553-30457208	-2.43785	4.15699	0.277248
chr6:30449606-30451881	0.535483	5.6748	0.753426
chr6:30449758-30452151	-0.817271	8.69332	0.14805
chr6:30449812-30457405	-0.239439	6.9485	0.808967
chr6:30449876-30452480	-0.343154	4.22664	0.896234
chr6:30450063-30452508	-0.0624949	7.01449	0.949032
chr6:30450968-30453841	-0.675738	9.54631	0.189319
chr6:30451294-30453965	-0.802623	6.24115	0.565809
chr6:30451643-30454068	-2.71899	3.46258	0.257127
chr6:30451796-30455550	-1.44681	6.52459	0.270274
chr6:30451882-30457600	0	0.215196	1
chr6:30451901-30455682	-0.668991	7.53534	0.388992
chr6:30452243-30455815	0.536126	7.25151	0.724782
chr6:30452487-30455872	1.99645	7.40834	0.0366701
chr6:30453715-30456061	-3.78315	0.646992	0.106547
chr6:30453878-30456330	-0.44511	6.50758	0.708246
chr6:30454067-30457146	-1.61988	7.09772	0.0731552
chr6:30454069-30457939	-0.619405	4.9754	0.771864
chr6:30455371-30457207	-0.525696	7.88138	0.49751
chr6:30455619-30457340	-0.593676	7.80731	0.423638
chr6:30455670-30458287	0	0.215196	1
chr6:30455744-30457417	-0.871099	4.06739	0.724802
chr6:30455848-30457573	-0.131502	6.3965	0.929959
chr6:30455894-30458503	-0.809144	6.4883	0.528383
chr6:30455920-30464287	-0.876822	6.7829	0.399909
chr6:30455951-30457843	1.4182	4.48099	0.609853
chr6:30456062-30457845	-0.124058	5.81653	0.936735
chr6:30457050-30458032	-0.726635	5.92788	0.619667
chr6:30457143-30458771	-0.389837	7.68069	0.59802
chr6:30457173-30458179	-3.81393	4.54194	0.124311
chr6:30457268-30464790	-0.874961	5.65434	0.685444
chr6:30457314-30458224	-1.10157	4.05053	0.665776
chr6:30457404-30460608	-0.569015	4.7291	0.808978
chr6:30457416-30458409	0.216572	6.19431	0.904862
chr6:30457512-30458493	-0.646715	6.62866	0.564415
chr6:30457599-30461670	-1.31416	6.28928	0.488729
chr6:30457707-30458623	1.56531	7.90455	0.0438123
chr6:30457844-30458719	-0.0771804	5.89182	0.966736
chr6:30457897-30461729	-0.920998	7.72278	0.197259
chr6:30457955-30465517	-0.0579983	5.04029	0.981091
chr6:30458001-30459515	-1.18309	6.41764	0.42276
chr6:30458125-30460109	0.382741	6.26905	0.847002
chr6:30458236-30460220	-2.4754	2.20534	0.318801
chr6:30458241-30462256	0.680806	6.22751	0.624282
chr6:30458378-30460616	-0.993714	3.42991	0.68659
[truncated: 10,003 more rows]

## Sheet: high_vs_ctrl
Table S3. Statistical enrichment of each sgRNA pair in the High samples compared to the control samples
Table is generated by function ‘glmQLFTest’ in R package ‘egeR’
sgRNA pair	logFC	logCPM	PValue
>eGFP-1	-7.69427	3.34382	4.68347e-05
>eGFP-2	-2.42289	3.02417	0.00063234
>eGFP-3	-3.01861	3.94422	0.000343983
>eGFP-4	-5.27693	3.3311	1.1679e-05
>eGFP-5	-2.5146	4.79648	0.000118453
>eGFP-6	-1.42165	4.74973	0.0055411
>NEG_30523114	2.32289	3.9244	0.00143989
>NEG_30523214	1.66149	6.37642	0.0096315
>NEG_30526846	0.975483	4.62532	0.114498
>NEG_30526901	1.18843	3.35079	0.0684543
>NEG_30529487	1.22378	2.10483	0.186159
>NEG_30529554	1.5571	3.55793	0.0640055
>NEG_30539505	1.54404	4.20105	0.0452379
>NEG_30540923	1.21733	4.24496	0.115591
>NEG_30558012	1.7861	5.54199	0.00854234
>NEG_30559534	-5.71487	1.843	0.00209308
>NEG_30565109	1.25366	4.93079	0.0717263
>NEG_30565125	1.26329	7.39453	0.00687702
>NEG_30565220	0	0.305378	1
>NEG_30565243	1.66433	4.02875	0.0464348
>NEG_30565679	1.58539	3.44063	0.0198507
>NEG_30566005	1.41415	5.26858	0.0118934
>NEG_30569693	2.1117	2.04571	0.0234516
>NEG_30590996	-0.59373	2.72921	0.232756
>NEG_30591278	1.20587	5.13712	0.0444709
>NEG_30591285	1.63701	3.25398	0.0454779
>NEG_30591313	0	0.305378	1
>NEG_30591348	1.41755	3.33584	0.0254061
>NEG_30591413	1.47283	3.14875	0.0692017
>NEG_30591899	1.49727	4.89306	0.0154875
>NEG_30591931	1.4437	7.89887	0.0178254
>NEG_30591940	2.67078	2.98341	0.00205293
>NEG_30592288	0.126376	3.2887	0.789007
>NEG_30592346	0.684599	5.55066	0.130265
>NEG_30592384	1.84423	6.06458	0.00760347
>NEG_30592393	0.972065	5.75144	0.0555658
>NEG_30592431	1.13512	5.66424	0.0253056
>NEG_30608194	1.33856	7.01149	0.0174947
>NEG_30608263	1.94239	4.93543	0.00824464
>NEG_30608278	0	0.305378	1
>NEG_30608292	0.970746	5.41271	0.0683939
>NEG_30608523	0.884214	3.94864	0.184049
>NEG_30617382	1.24615	3.49399	0.088572
>NEG_30617562	1.29123	3.2019	0.0983052
>NEG_30617616	1.56751	4.88101	0.0216681
>NEG_30617641	1.58103	5.08527	0.0106478
>NEG_30617663	1.72926	5.42117	0.00868713
>NEG_30617672	0	0.305378	1
>NEG_30617704	0.719468	5.72298	0.145651
>NEG_30618060	0.601838	3.9014	0.222675
>NEG_30618080	0.0273143	2.47863	0.965121
>NEG_30618171	1.17093	5.66869	0.0407583
>NEG_30620471	0	0.305378	1
>NEG_30620622	1.39455	5.3627	0.00840524
>NEG_30631389	2.17296	3.50362	0.0149641
>NEG_30631395	1.3812	7.49116	0.0273547
>NEG_30631474	-0.807327	1.14009	0.461281
>NEG_30631990	1.79324	5.24433	0.015942
>NEG_30632031	1.03069	1.07588	0.312666
>NEG_30632036	0	0.305378	1
>NEG_30632095	1.89949	4.81722	0.00919158
>NEG_30632339	1.8259	4.48922	0.00815346
>NEG_30632353	1.81896	5.71071	0.0191911
>NEG_30632443	1.06893	5.96683	0.0149459
>NEG_30632468	1.69269	5.74733	0.0175676
>NEG_30632716	1.53107	5.58586	0.0137951
>NEG_30632951	1.78623	4.48807	0.00904383
>NEG_30632995	0.992937	7.35588	0.0618167
>NEG_30633013	1.77511	1.52247	0.0298825
>NEG_30633019	0	0.305378	1
>NEG_30633040	1.64022	4.47863	0.00413442
>NEG_30633063	1.69811	6.03119	0.00588559
>NEG_30633074	1.5394	5.72313	0.0113207
>NEG_30646993	1.58348	2.74881	0.0313126
>NEG_30647047	1.5063	6.77919	0.00763876
>NEG_30647054	1.16379	5.75142	0.0474433
>NEG_30647083	1.14219	0.889187	0.32681
>NEG_30647095	0.669506	4.63971	0.154502
>NEG_30647408	1.73647	5.38275	0.0122703
>NEG_30647415	0.97874	5.38266	0.0486932
>NEG_30647523	1.76543	3.70579	0.0117071
>NEG_30673267	1.54953	6.36606	0.0138653
>NEG_30677588	1.14437	7.14219	0.0485505
>NEG_30677627	1.16109	4.30219	0.09788
>NEG_30677635	1.39449	4.2435	0.0272578
>NEG_30689795	1.7248	4.61694	0.0163724
>NEG_30689902	1.34455	6.02889	0.0313628
>NEG_30690705	1.37144	1.688	0.0797085
>NEG_30690826	1.52192	5.5727	0.0359656
>NEG_30691158	1.66477	4.65008	0.0141636
>NEG_30691827	0	0.305378	1
>NEG_30691866	0.894715	6.27155	0.017938
>NEG_30692004	1.27355	7.74989	0.0282088
>NEG_30693051	3.23329	0.571378	0.0525157
>NEG_30693073	1.34315	2.69057	0.0451279
>NEG_30693134	1.30233	4.661	0.0061524
>NEG_30693203	1.04239	6.15199	0.0536651
>NEG_30693472	1.54318	6.7063	0.0130548
>NEG_30693479	1.86865	5.20098	0.00424357
>NEG_30693496	1.34	2.7517	0.147878
>NEG_30693521	1.50255	4.92334	0.0234232
>NEG_30693566	1.35804	5.80556	0.0212471
>NEG_30693604	1.30752	3.90065	0.0248025
>NEG_30702639	1.27975	7.11444	0.0356841
>NEG_30702674	1.5212	5.37521	0.0431686
>NEG_30722212	1.81517	4.80818	0.00638256
>NEG_30722229	1.54012	3.69205	0.00610255
>NEG_30722758	2.56316	1.9053	0.0136308
>NEG_30722800	1.85592	5.43049	0.0244763
>NEG_30746489	1.76166	5.55905	0.004416
>NEG_30746557	0.885446	3.07917	0.209045
>NEG_30746583	1.2793	5.18216	0.0295985
>NEG_30746601	1.14726	1.46868	0.175315
>NEG_30746634	1.68377	4.04628	0.0230597
>NEG_30746662	0.921408	6.27769	0.0488284
>NEG_30746719	1.66071	3.95927	0.0210087
>NEG_30746850	1.12486	7.03074	0.0245118
>NEG_30746897	-0.4156	2.53646	0.482917
>NEG_30748525	1.20342	4.53378	0.0891
>NEG_30748545	2.03024	5.26456	0.00605174
>NEG_30748567	0.542857	0.567226	0.730565
>NEG_30748581	0	0.305378	1
>NEG_30748718	1.42882	7.09792	0.00386939
>NEG_30748739	1.71415	6.58306	0.00594261
>NEG_30748767	1.82765	4.56556	0.00398531
>NEG_30748835	0.397867	3.02058	0.508983
>NEG_30754822	1.26146	3.99041	0.0463693
>NEG_30754832	2.35592	4.7791	0.00452541
>NEG_30754863	1.28201	5.61202	0.0178661
>NEG_30754906	0.675218	1.44986	0.408913
>NEG_30754926	1.7367	2.67008	0.0344229
>NEG_30754997	1.59242	5.29268	0.0217923
>NEG_30755065	1.30395	5.01987	0.0462774
>NEG_30757938	1.29882	7.99433	0.0150304
>NEG_30758067	1.99445	2.14261	0.00822739
>NEG_30758369	1.02111	3.44636	0.175848
>NEG_30758410	2.37332	2.76911	0.00516403
>NEG_30758488	1.23989	6.39515	0.0374962
>NEG_30763041	0	0.305378	1
>NEG_30763690	1.13585	2.84681	0.0574175
>NEG_30763717	1.56604	4.87024	0.0109654
>NEG_30766398	-0.10189	1.36324	0.911833
>NEG_30766428	0.861514	3.5483	0.111516
>NEG_30766454	1.17756	7.03754	0.0314628
>NEG_30766505	1.02309	5.54549	0.0185286
>NEG_30766526	1.19037	8.58932	0.0394985
>NEG_30766532	1.22448	5.91182	0.0341563
>NEG_30766545	1.23018	3.48867	0.0574478
>NEG_30776323	0	0.305378	1
>NEG_30793179	1.07333	5.9667	0.062478
>NEG_30793223	1.12973	2.3492	0.0690598
>NEG_30793273	1.29491	7.62856	0.0337623
>NEG_30793288	1.77195	2.50543	0.00666678
>NEG_30793298	1.41686	5.89678	0.0386935
>NEG_30793306	1.21943	3.52378	0.0474341
>NEG_30793327	2.03505	2.00741	0.00942793
>NEG_30795116	1.19527	4.99423	0.0202448
>NEG_30795129	-4.43388	1.13273	0.0141305
>NEG_30795855	0.958225	7.63305	0.0521156
>NEG_30795942	1.21916	5.4191	0.0362974
>NEG_30795984	1.86506	3.7255	0.0163895
>NEG_30796669	1.49333	6.31927	0.0198447
>NEG_30796681	1.18392	2.36473	0.188807
>NEG_30796689	-0.0835775	1.82056	0.915325
>NEG_30796692	1.75544	4.17353	0.00923374
>NEG_30796716	1.29593	2.33226	0.162152
>NEG_30797226	1.21759	1.32005	0.33937
>NEG_30797255	1.10318	1.83433	0.234263
>NEG_30797260	1.83054	1.07241	0.11043
>NEG_30797288	1.9771	2.73781	0.00288503
>NEG_30798487	1.37736	6.48893	0.0197536
>NEG_30798538	1.8456	4.84706	0.0129264
>NEG_30798570	0.917734	5.11783	0.049463
>NEG_30801887	0.59788	3.2453	0.174228
>NEG_30806177	-0.744377	0.784048	0.5854
>NEG_30806221	0.393105	2.86593	0.38846
>NEG_30806289	1.2268	2.62646	0.0834587
>NEG_30806460	1.64906	5.73904	0.00436296
>NEG_30806522	0.67774	1.68798	0.348386
>NEG_30806566	0	0.305378	1
>NEG_30806711	1.72178	4.39054	0.0112559
>NEG_30806741	1.52861	3.133	0.016292
>NEG_30806757	1.38372	8.27449	0.0258095
>NEG_30806828	0.916916	7.9285	0.0304678
>NEG_30818554	1.20541	4.44456	0.0691129
>NEG_30818582	2.20115	4.02339	0.00694263
>NEG_30818609	1.48792	5.9689	0.00920818
>NEG_30818625	1.30348	5.69083	0.0239669
>NEG_30818639	1.2704	4.56506	0.0388536
>NEG_30818669	1.53704	3.79635	0.0481041
>NEG_30818674	1.74807	5.641	0.011896
>NEG_30818698	2.87142	2.70017	0.00211013
>NEG_30820315	0.915503	5.90697	0.0481817
>NEG_30820369	1.15072	2.08598	0.115706
>NEG_30820413	1.92129	3.19799	0.0165762
>NEG_30822451	2.95494	2.38064	0.00168221
>NEG_30822500	-0.278724	3.35502	0.576388
>NEG_30822581	0.418573	3.8594	0.22482
>NEG_30822618	0	0.305378	1
>NEG_30835371	0.142276	4.0762	0.676879
>NEG_30835491	1.90206	4.46111	0.00869599
>NEG_30839926	1.69093	3.70533	0.00811581
>NEG_30845452	1.40473	4.81525	0.0481506
>NEG_30845518	1.64561	5.59046	0.0271669
>NEG_30845539	1.70482	4.99224	0.0134372
>NEG_30845544	1.23364	7.32639	0.0249829
>NEG_30845599	1.78012	5.64796	0.00606546
>NEG_30845657	-0.0833819	2.76431	0.861555
>NEG_30857785	1.56106	6.85208	0.0102885
>NEG_30857823	1.16336	3.81269	0.0312285
>NEG_30857844	1.60344	5.65899	0.0175521
>NEG_30866479	1.3287	4.35226	0.0192764
>NEG_30866491	1.54378	4.32475	0.0096235
>NEG_30866544	1.40645	1.83816	0.161095
>NEG_30866565	1.15705	6.88778	0.0331548
>NEG_30866600	1.42302	4.33954	0.0215765
>NEG_30886570	0.619503	3.6997	0.108598
>NEG_30886619	1.12035	4.90152	0.06474
>NEG_30886653	1.54186	2.7277	0.0205536
>NEG_30886671	1.23066	4.52773	0.029569
>NEG_30897878	0.79682	4.06828	0.188239
>NEG_30897981	0	0.305378	1
>NEG_30902893	0.590538	2.40674	0.287916
>NEG_30902932	2.49375	2.85476	0.00610949
>NEG_30902960	1.50397	6.23585	0.0185188
>NEG_30903000	1.89234	3.70078	0.00689449
>NEG_30904416	1.57634	2.89297	0.059528
>NEG_30904430	0	0.305378	1
>NEG_30904438	1.38929	6.49329	0.0251845
>NEG_30904730	1.45964	2.82929	0.0267144
>NEG_30914242	1.65838	6.46519	0.00784316
>NEG_30919923	0.387839	4.44509	0.278129
>NEG_30920009	-0.613721	3.53228	0.114345
>NEG_30920150	1.69734	6.322	0.00212075
>NEG_30920170	0.835272	3.05223	0.207701
>NEG_30923953	1.39515	4.82945	0.00748041
>NEG_30923980	1.77562	5.63929	0.0288638
>NEG_30923987	1.33265	6.5465	0.0494862
>NEG_30924050	1.07616	4.68836	0.0770844
>NEG_30925263	0.955676	2.99228	0.0858602
>NEG_30952137	0.582391	2.2689	0.299781
>NEG_30952290	0.732185	5.51832	0.115392
>NEG_30953582	1.23065	5.91885	0.0763073
>NEG_30953604	0.612964	5.39939	0.124318
>NEG_30953647	1.31872	6.73208	0.0115742
>NEG_30953657	1.27906	7.52957	0.0300672
>NEG_30953686	0	0.305378	1
>NEG_30956603	1.00114	6.02533	0.0272642
>NEG_30956668	2.17136	3.79988	0.00508077
>NEG_30957718	0.330951	5.17851	0.346344
>NEG_30957768	1.58979	4.87977	0.0176899
>NEG_30957790	1.71655	6.31932	0.00853376
>NEG_30957793	1.80709	3.95257	0.0126628
>NEG_30957860	1.82304	3.2613	0.0139523
>NEG_30958285	1.12471	5.76025	0.0798179
>NEG_30958303	1.48354	5.73263	0.0126903
>NEG_30958331	1.39528	5.26686	0.0156707
>NEG_30958363	1.3242	3.00653	0.0595274
>NEG_30958573	1.12954	4.9396	0.0378288
>NEG_30958685	0	0.305378	1
>NEG_30959571	1.46938	3.93336	0.0408094
>NEG_30959711	-0.495208	2.46375	0.491234
>NEG_30960159	2.4756	1.31051	0.0462183
>NEG_30960269	1.53879	5.7178	0.0244564
>NEG_30960284	1.82844	4.25938	0.00587429
>NEG_30960297	0.783839	4.76216	0.192068
>NEG_30960568	1.32726	4.39404	0.0546715
>NEG_30960606	1.40008	6.73942	0.0183885
>NEG_30960614	1.38731	6.84256	0.0207615
>NEG_30960619	1.64863	4.77184	0.0224952
>NEG_30960682	2.38924	0.452186	0.16395
>NEG_30960724	2.15289	3.83534	0.0116449
>NEG_30961961	1.52469	7.84476	0.00881648
>NEG_30962063	2.31052	0.89319	0.0955114
>NEG_30962114	1.22346	1.88441	0.188486
>NEG_30962138	0.908642	3.41691	0.206086
>NEG_30962195	1.44988	3.6768	0.0090871
>NEG_30962198	1.18477	6.09784	0.0421407
>NEG_30962329	1.88559	6.99671	0.00704898
>NEG_30962349	1.17787	5.87095	0.0150745
>NEG_30962371	0	0.305378	1
>NEG_30968767	1.65773	6.97417	0.0159152
>NEG_30968817	1.11252	5.79676	0.0476006
>NEG_30968843	1.55931	5.34781	0.00591671
>NEG_30968882	1.95069	3.21356	0.00443623
>NEG_30983750	1.70217	4.13112	0.0124036
>NEG_30983787	0.91005	4.86219	0.0221173
>NEG_30983811	2.09199	4.47813	0.00893072
>NEG_30983828	1.74213	5.16575	0.0168953
>NEG_30983869	0	0.305378	1
>NEG_30989680	0	0.305378	1
>NEG_30989686	1.70518	3.41611	0.013552
>NEG_30989882	1.19401	6.00802	0.0661496
>NEG_30989935	2.14101	1.4536	0.0556084
>NEG_30989990	1.68085	4.24956	0.0201298
>NEG_30990004	3.00903	2.17977	0.00451417
>NEG_30991385	1.09531	7.62255	0.00829669
>NEG_30998153	0	0.305378	1
>NEG_30998165	1.53694	5.3707	0.00883767
>NEG_30998198	1.64911	6.82667	0.0152347
>NEG_30998451	2.10049	4.21799	0.0031274
>NEG_30998569	1.40298	6.33017	0.0102129
>NEG_30998604	0.686084	1.80333	0.322611
>NEG_31018353	0.61714	7.35531	0.124958
>NEG_31018375	0	0.305378	1
>NEG_31018447	2.00231	3.77839	0.0124426
>NEG_31018453	1.49329	5.79252	0.0221394
>NEG_31018545	1.51019	4.03561	0.0196639
>NEG_31031423	0.876944	2.59107	0.195904
>NEG_31031469	1.41588	3.83078	0.0394671
>NEG_31031477	1.56107	5.7824	0.0404683
>NEG_31031501	1.4792	5.3607	0.0323579
>NEG_31050265	1.9279	4.29211	0.00969258
>NEG_31050290	-0.430764	2.35029	0.446286
>NEG_31050465	1.4841	5.90482	0.0145789
>NEG_31050471	0.92686	6.52092	0.105609
>NEG_31057710	1.61899	6.59061	0.00589379
>NEG_31057731	1.35211	4.78316	0.0198065
>NEG_31057804	1.42473	7.33077	0.0128719
>NEG_31062133	1.49856	6.83753	0.00716562
>NEG_31084113	1.47539	3.09424	0.0493409
>NEG_31084168	1.52645	4.92961	0.0119391
>NEG_31084270	0	0.305378	1
>NEG_31118665	1.27351	4.29119	0.0266958
>NEG_31118674	0.642384	3.49137	0.205905
>NEG_31118726	1.68489	5.89875	0.00728416
>NEG_31118750	1.34791	6.01255	0.0486756
>NEG_31120161	1.00972	6.32477	0.0324172
>NEG_31120223	0.679195	2.23391	0.232725
>NEG_31120228	2.3814	4.11865	0.00355846
>NEG_31120255	2.38147	0.444392	0.164678
>NEG_31120368	1.30776	7.29208	0.00943218
>NEG_31120378	0.888364	8.33655	0.0692311
>NEG_31120395	0	0.305378	1
>NEG_31144739	1.59052	3.45724	0.0159353
>NEG_31144798	0.947211	4.34983	0.0723894
>NEG_31144825	1.25555	5.46107	0.0765656
>NEG_31144875	0.736429	7.25703	0.033114
>NEG_31146586	1.077	7.89099	0.0366706
>NEG_31155593	1.66468	6.10037	0.0180663
>NEG_31155606	1.78836	5.33079	0.0221945
>NEG_31155655	0	0.305378	1
>NEG_31155692	1.39507	4.99317	0.0398489
>NEG_31159887	0	0.305378	1
>NEG_31159977	1.39671	2.18693	0.139311
>NEG_31160060	0	0.305378	1
>NEG_31163472	2.39796	3.92224	0.00162355
>NEG_31163499	0	0.305378	1
>NEG_31186680	1.34228	3.82274	0.0476941
>NEG_31186730	1.3184	6.18714	0.0114476
>NEG_31186733	1.078	1.58509	0.158549
>NEG_31186769	0	0.305378	1
>NEG_31186799	0.992471	4.34565	0.140881
>NEG_31190069	1.84151	4.65149	0.016099
>NEG_31190152	1.53128	3.13833	0.0222353
>NEG_31190192	1.2844	7.16648	0.0241125
>NEG_31190378	1.38208	3.77114	0.0520944
>NEG_31190469	0.602605	5.97595	0.239868
>NEG_31190494	0	0.305378	1
>NEG_31190515	2.04494	4.58397	0.00581503
>NEG_31190749	2.53648	4.1892	0.00440395
>NEG_31190948	0	0.305378	1
>NEG_31191030	1.45202	4.55082	0.0125788
>NEG_31191112	2.18692	2.2423	0.0372657
>NEG_31204021	0.551724	1.94368	0.392206
>NEG_31204071	1.95613	4.94791	0.00615919
>NEG_31204134	0.901952	1.5297	0.253144
>NEG_31204144	2.80543	2.94988	0.00428662
>NEG_31204219	1.31151	7.12455	0.0187363
>NEG_31204238	1.61447	3.97836	0.00330524
>NEG_31213354	2.14416	4.02359	0.0116974
>NEG_31213401	0	0.305378	1
>NEG_31213557	1.12973	2.3492	0.0690598
>NEG_31215508	0.950076	6.63395	0.0666922
>NEG_31215554	2.42455	2.67539	0.0119855
>NEG_31215597	1.26453	4.6333	0.0580018
>NEG_31215654	0.978978	7.9674	0.0307168
>NEG_31215692	1.19427	2.19711	0.0842289
>NEG_31218157	0	0.305378	1
>NEG_31218258	4.15655	0.804213	0.00654259
>NEG_31218910	1.74855	4.87806	0.0209425
>NEG_31218939	0	0.305378	1
>NEG_31218966	1.26388	2.22327	0.176922
>NEG_31219005	1.46622	2.76939	0.0163714
>NEG_31219034	3.67831	1.96018	0.00811422
>NEG_31219056	1.34715	6.4787	0.0257967
>NEG_31234018	0.684656	3.97918	0.0771472
>NEG_31234092	1.994	1.81488	0.00824979
>NEG_31234122	1.9307	6.106	0.0136162
>NEG_31234150	1.13589	5.30354	0.0153606
>NEG_31234551	0.575199	5.09846	0.172029
>NEG_31234576	0	0.305378	1
>NEG_31235219	1.34824	8.31917	0.0268631
>NEG_31235232	1.55605	4.07132	0.00414681
>NEG_31235287	1.76346	5.17741	0.0145102
>NEG_31235295	2.18268	3.64524	0.00140962
>NEG_31235326	1.73051	5.46587	0.0112614
>NEG_31237367	0.807959	2.62377	0.192074
>NEG_31237392	1.72481	3.49218	0.00389656
>NEG_31237465	0	0.305378	1
>NEG_31237488	1.63502	4.24177	0.0115215
>NEG_31238244	1.54887	2.95044	0.0246601
>NEG_31238260	0.677662	1.79353	0.323968
>NEG_31238317	1.23578	8.08292	0.0238224
>NEG_31245001	3.18121	3.25233	0.00033724
>NEG_31245035	2.09667	4.16548	0.00836946
>NEG_31246404	-3.49902	0.780014	0.0521867
>NEG_31246464	1.4203	7.51005	0.0255621
>NEG_31246892	1.52824	8.18492	0.02053
>NEG_31246906	0.672531	2.68299	0.185008
>NEG_31246964	1.43473	5.69644	0.0166119
>NEG_31247647	1.4318	3.28983	0.0481249
>NEG_31247773	-0.593297	1.54829	0.472039
>NEG_31247800	1.13748	4.22878	0.0468545
>NEG_31247864	1.76465	3.83226	0.0269403
>NEG_31247877	2.99262	2.60807	0.00235864
>NEG_31247900	0	0.305378	1
>NEG_31248403	1.56027	5.74814	0.0256342
>NEG_31248515	1.41655	5.94771	0.0279898
>NEG_31248837	1.15993	3.77351	0.0561701
>NEG_31248850	1.00213	6.33281	0.0643466
>NEG_31248975	1.23387	3.87987	0.0625911
>NEG_31248986	0	0.305378	1
>NEG_31250376	1.07656	5.65666	0.0353392
>NEG_31250395	1.8135	5.50669	0.00996776
>NEG_31256478	0	0.305378	1
>NEG_31256506	1.62313	5.71293	0.0327564
>NEG_31256528	1.23846	5.78672	0.0170917
>NEG_31256533	1.52136	4.53144	0.00985584
>NEG_31256613	1.08276	2.99004	0.0685179
chr6:30132134-30135081	-0.245995	6.93566	0.119516
chr6:30132154-30136329	0.241761	6.03886	0.242067
chr6:30132159-30139582	-1.13248	4.15364	0.0313226
chr6:30132333-30135422	-0.214987	8.65953	0.0572032
chr6:30132384-30136433	-0.27058	6.31412	0.149771
chr6:30132465-30135467	0.00854256	5.05105	0.973046
chr6:30132704-30135599	-0.415195	5.78479	0.0680587
chr6:30132705-30136787	0.326236	7.82666	0.0166269
chr6:30134702-30135634	-2.43749	3.67022	0.000133687
chr6:30134819-30135905	-0.187835	8.16034	0.140112
chr6:30134952-30135926	0	0.305378	1
chr6:30134969-30137612	0	0.305378	1
chr6:30135033-30140722	0.158708	7.72566	0.253455
chr6:30135062-30136074	0	0.305378	1
chr6:30135178-30136293	0.49538	6.73312	0.0026568
chr6:30135413-30136351	0.271595	2.60198	0.59357
chr6:30135509-30138329	0.510646	7.13117	0.00125605
chr6:30135523-30136529	0	0.305378	1
chr6:30135633-30136792	0.471529	5.28022	0.0533424
chr6:30135656-30141180	0.93157	5.90487	0.00011627
chr6:30135703-30138378	0.395136	3.20117	0.341795
chr6:30135795-30137041	-0.285246	6.009	0.17418
chr6:30135905-30137128	-0.407146	7.07618	0.00931648
chr6:30136057-30137516	-0.216231	3.1821	0.609989
chr6:30136075-30138690	-0.163294	8.73879	0.142207
chr6:30136244-30137563	0	0.305378	1
chr6:30136350-30137651	0.693631	4.89431	0.00819693
chr6:30136419-30139472	0	0.305378	1
chr6:30136484-30137827	0.658848	5.70964	0.0073777
chr6:30136766-30137972	0.894845	4.32012	0.0192094
chr6:30136786-30140127	-4.43377	1.13257	0.0108643
chr6:30136802-30143132	0.128505	6.45179	0.465458
chr6:30136966-30138177	0.330841	7.66022	0.0193951
chr6:30137059-30138273	-4.59654	1.20856	0.0268389
chr6:30137421-30138324	0.276588	6.74906	0.0944903
chr6:30137523-30138479	-0.191942	7.14086	0.210488
chr6:30137598-30140406	-0.379291	4.53524	0.195402
chr6:30137646-30149159	-1.16461	5.60027	6.52172e-05
chr6:30137650-30138629	0.302995	7.78144	0.027936
chr6:30137781-30138832	-0.0151966	5.11463	0.951528
chr6:30137943-30139313	0	0.305378	1
chr6:30137987-30140717	0.656752	1.29874	0.514451
chr6:30138042-30139449	-0.898159	6.59862	5.85377e-05
chr6:30138212-30139540	-0.200704	6.03362	0.332662
chr6:30138309-30139604	-0.495838	5.63139	0.0464814
chr6:30138348-30140854	0	0.305378	1
chr6:30138427-30140059	-0.647459	4.65256	0.0431348
chr6:30138511-30152045	0	0.305378	1
chr6:30138577-30140110	0.00783026	8.01332	0.952344
chr6:30138689-30141160	-1.74695	3.16532	0.00424065
chr6:30138695-30140350	0.0251012	7.76623	0.85587
chr6:30139012-30140397	0.179881	6.63541	0.284207
chr6:30139397-30140566	-0.391647	6.064	0.0787723
chr6:30139464-30142192	-0.1314	6.3817	0.468714
chr6:30139500-30140703	0.148465	8.87883	0.17078
chr6:30139581-30152901	-0.101547	6.26992	0.593773
chr6:30139618-30140848	-0.579387	3.55859	0.190696
chr6:30139683-30143079	-0.11849	6.87946	0.461467
chr6:30139914-30141138	-0.219785	6.4522	0.215833
chr6:30140117-30142021	-0.0274262	4.49033	0.939639
chr6:30140259-30142025	0.0665683	5.42846	0.782189
chr6:30140369-30142185	-0.758518	3.84705	0.0362889
chr6:30140386-30143353	-0.189383	5.25974	0.440536
chr6:30140411-30153470	-0.172268	7.27495	0.2565
chr6:30140563-30142515	-0.195946	4.4858	0.507442
chr6:30140587-30147936	-0.620378	4.30578	0.0483761
chr6:30140716-30142534	-0.165017	6.24506	0.392978
chr6:30140802-30149147	0.0190332	6.26717	0.920113
chr6:30140858-30142932	0	0.305378	1
chr6:30140929-30154030	-2.21025	3.21973	0.000763732
chr6:30141145-30143077	0.522367	4.86817	0.0461526
chr6:30141152-30150026	-5.84978	1.93207	0.00237997
chr6:30141918-30143180	-1.3345	4.21678	0.00993451
chr6:30142024-30143334	-0.0381797	6.82782	0.813215
chr6:30142171-30143446	0.0740923	5.1634	0.76305
chr6:30142186-30150084	-0.223774	7.92278	0.0960379
chr6:30142296-30143548	-0.225487	6.07913	0.292155
chr6:30142532-30145510	0.0560821	4.4163	0.858167
chr6:30142874-30147711	0.487695	4.13104	0.141108
chr6:30143053-30147850	0.498794	6.66583	0.0159048
chr6:30143078-30150594	0.590783	5.39869	0.0150269
chr6:30143121-30156507	0.271977	8.94231	0.0121286
chr6:30143162-30149113	-0.119682	5.54386	0.611161
chr6:30143306-30149292	0.67494	4.06125	0.0400572
chr6:30143358-30152044	0.023678	6.32589	0.897613
chr6:30143416-30149556	-1.13975	4.12878	0.00155196
chr6:30143547-30149559	-0.332562	6.20775	0.0877899
chr6:30145425-30149823	-0.464766	5.45806	0.0581417
chr6:30146004-30149995	0.0862181	5.05574	0.75557
chr6:30147841-30150041	0.487472	6.59383	0.00464844
chr6:30147864-30152448	0.1451	3.65121	0.689269
chr6:30147940-30157218	-1.0436	4.83297	0.0033038
chr6:30149100-30150150	0.572692	6.90239	0.000359879
chr6:30149137-30152520	0.203996	8.14239	0.111925
chr6:30149215-30150561	2.28566	3.61887	8.13608e-05
chr6:30149436-30150853	0	0.305378	1
chr6:30149558-30151165	-0.177153	6.4683	0.316613
chr6:30149667-30152747	0.150907	6.31581	0.414764
chr6:30149752-30151396	0.454464	5.92306	0.0332548
chr6:30149927-30151954	0	0.305378	1
chr6:30150039-30152032	0.166481	7.77554	0.228092
chr6:30150048-30152955	-0.181917	6.83187	0.260836
chr6:30150124-30157670	-0.0151767	2.52794	0.979272
chr6:30150132-30152132	-1.96639	5.06114	3.2069e-05
chr6:30150570-30152331	-0.05267	4.97934	0.837671
chr6:30150593-30153250	0.123277	6.63147	0.468623
chr6:30150787-30152447	0.256625	5.59914	0.267641
chr6:30151084-30152665	0.208334	7.10174	0.176044
chr6:30151349-30152786	-0.0361779	7.85384	0.790692
chr6:30151925-30152900	0.319032	6.34731	0.0808943
chr6:30151969-30153460	-0.755958	3.41093	0.0634305
chr6:30152011-30153015	-0.0918385	3.07471	0.833412
chr6:30152143-30153177	0.710515	3.75443	0.0975508
chr6:30152223-30153793	-0.00848416	4.76681	0.976451
chr6:30152327-30153345	0.0582726	6.79275	0.721991
chr6:30152435-30153435	-0.0286867	6.14648	0.884364
chr6:30152503-30154020	-1.49026	4.20485	0.00070908
chr6:30152664-30153536	0	0.305378	1
chr6:30152743-30154255	0.012158	5.12448	0.961388
chr6:30152760-30153684	0.0285695	8.51376	0.806897
chr6:30152837-30158199	0.0239395	8.27366	0.846581
chr6:30152899-30153754	-0.00835701	3.49396	0.985029
chr6:30152954-30154973	-0.223162	5.10744	0.38093
chr6:30153011-30153960	0.427372	8.7978	0.000249992
chr6:30153174-30154048	0	0.305378	1
chr6:30153201-30156170	-0.290958	8.77	0.00893689
chr6:30153286-30154169	-0.759226	5.94354	0.00496876
chr6:30153382-30158963	-1.37623	4.94603	8.5924e-05
chr6:30153407-30154672	0.374175	5.74282	0.0997339
chr6:30153428-30156390	0.337711	8.27096	0.00714005
chr6:30153514-30154916	0.0339273	7.83133	0.803254
chr6:30153626-30155111	0.154924	7.6843	0.268404
chr6:30153760-30156168	-1.18324	2.03926	0.083484
chr6:30153792-30156497	0.605927	6.22904	0.00208319
chr6:30153935-30156403	-0.0533124	6.74301	0.746997
chr6:30154009-30156698	-0.640839	4.16653	0.101328
chr6:30154021-30159558	-0.153759	4.71029	0.626234
chr6:30154042-30156467	-1.04596	4.67427	0.00589464
chr6:30154168-30156581	-0.0236688	6.58295	0.890825
chr6:30154251-30157107	0	0.305378	1
chr6:30154337-30156693	0.18795	5.31482	0.438966
chr6:30154918-30157210	-0.28665	6.85067	0.0776156
chr6:30154922-30156843	2.77299	1.77571	0.00744358
chr6:30155119-30157092	-0.387367	5.66068	0.097754
chr6:30155202-30157507	0.536586	4.96215	0.0369942
chr6:30156143-30157171	-0.655728	5.35974	0.00866643
chr6:30156205-30157735	0	0.305378	1
chr6:30156331-30157289	-0.395292	6.56224	0.0334005
chr6:30156403-30163454	0.023278	2.81553	0.960522
chr6:30156457-30158103	0.0532745	5.43707	0.825947
chr6:30156466-30157500	-1.22637	3.88317	0.00269808
chr6:30156575-30157604	0	0.305378	1
chr6:30156671-30158331	0.350769	3.30135	0.442895
chr6:30156683-30157732	0.673906	3.21998	0.10305
chr6:30156855-30157957	0.107113	9.26261	0.293417
chr6:30156935-30158538	-0.119932	4.70311	0.663528
chr6:30157036-30158046	-0.625038	5.59846	0.015516
chr6:30157113-30163477	0.566138	4.42359	0.0731823
chr6:30157143-30158172	-0.316343	5.98502	0.135409
chr6:30157194-30158819	0.0015533	7.30994	0.991582
chr6:30157301-30158328	1.05902	3.88352	0.0076247
chr6:30157475-30158519	-1.16554	3.27893	0.00864043
chr6:30157501-30159513	-0.171188	4.194	0.592265
chr6:30157601-30158606	-4.74217	1.27968	0.00831684
chr6:30157651-30164334	-1.0002	4.31353	0.00203852
chr6:30157722-30158732	0.504008	5.53477	0.0476043
chr6:30157734-30159728	0.53131	6.71899	0.00194528
chr6:30157894-30158960	0.275448	7.08036	0.0791214
chr6:30158044-30159306	-0.19877	6.18893	0.312795
chr6:30158061-30160634	0	0.305378	1
chr6:30158150-30159506	0.148155	9.37632	0.138395
chr6:30158200-30164780	0.154553	6.39749	0.388853
chr6:30158329-30162943	0.538688	5.19152	0.0453267
chr6:30158340-30159511	-0.00351053	7.11548	0.981934
chr6:30158516-30159711	-0.0756389	7.08459	0.625619
chr6:30158551-30163321	-1.28777	3.14417	0.0120523
chr6:30158605-30160079	-0.0783178	5.93736	0.715258
chr6:30158742-30160224	-4.04081	0.967562	0.0192593
chr6:30158821-30163520	0.573963	6.20082	0.00310282
chr6:30158923-30160576	0	0.305378	1
chr6:30158961-30165714	-0.52616	6.04403	0.0235897
chr6:30159156-30160583	0.054375	10.3336	0.531982
chr6:30159307-30162851	-0.200215	5.17893	0.423844
chr6:30159507-30163086	0	0.305378	1
chr6:30159512-30163889	0.181965	6.01241	0.379892
chr6:30159515-30166915	0.315754	7.26497	0.0369923
chr6:30159651-30163157	-0.71349	5.11587	0.005494
chr6:30159726-30164210	-0.471883	1.30615	0.612711
chr6:30160031-30163297	0.0566768	4.77857	0.834297
chr6:30160128-30164571	0.059482	6.01351	0.776602
chr6:30160225-30163438	-1.09665	4.25062	0.00162759
chr6:30160459-30163530	0.169775	2.96388	0.7066
chr6:30160582-30163783	-0.233073	2.80961	0.625445
chr6:30162845-30163849	0.0969705	6.76072	0.553587
chr6:30162944-30168206	0.160932	7.75748	0.243497
chr6:30162947-30163986	-0.125909	7.80193	0.359725
chr6:30162952-30164767	0.286059	5.1474	0.249126
chr6:30163087-30164208	-2.60702	1.48554	0.0194078
chr6:30163263-30164333	-0.359822	3.33552	0.380367
chr6:30163301-30165199	0.261803	5.90535	0.22781
chr6:30163396-30164504	-0.135484	7.82905	0.322509
chr6:30163449-30168234	0.0953332	7.65763	0.500338
chr6:30163516-30164637	-0.271833	5.95499	0.227943
chr6:30163531-30165707	-0.263216	6.30256	0.15926
chr6:30163698-30164735	-1.30435	3.92713	0.00214961
chr6:30163818-30164991	-0.342663	2.33757	0.547941
chr6:30163856-30166271	0	0.305378	1
chr6:30163926-30165121	0.017492	8.68922	0.876905
chr6:30164161-30165198	-0.14014	6.86414	0.386222
chr6:30164209-30166288	0.726906	5.60183	0.00265192
chr6:30164235-30169962	-0.2596	5.40733	0.282267
chr6:30164328-30165671	0.219411	7.43642	0.141309
chr6:30164481-30165834	-2.6213	0.562913	0.168615
chr6:30164564-30166561	0.658891	4.3302	0.0862312
chr6:30164618-30166026	0.14133	8.38092	0.243476
chr6:30164734-30166279	0.19326	6.84069	0.293908
chr6:30164736-30172429	-0.245124	5.20716	0.330177
chr6:30164756-30166910	0.316985	7.10815	0.0390937
chr6:30164851-30166406	0	0.305378	1
chr6:30165014-30166445	-0.102131	8.77351	0.357321
chr6:30165124-30167386	-0.551958	6.24131	0.0144101
chr6:30165166-30166537	0.510857	4.57851	0.0711675
chr6:30165262-30173287	0.258726	6.19129	0.184009
chr6:30165657-30166726	-0.189008	6.79992	0.245012
chr6:30165692-30168179	0.229991	4.82652	0.386956
chr6:30165743-30166896	-0.185859	5.49849	0.440016
chr6:30166025-30167171	-1.6696	3.8751	0.011052
chr6:30166048-30168495	-0.362997	4.27615	0.273559
chr6:30166208-30167271	1.30972	4.36377	0.000730374
chr6:30166272-30168669	0.11736	5.38302	0.626921
chr6:30166341-30167372	-0.597037	4.11196	0.0735319
chr6:30166425-30173870	0.803246	6.2144	0.000157764
chr6:30166444-30167919	-0.447306	2.14108	0.469598
chr6:30166512-30169079	-0.219437	7.6128	0.121772
chr6:30166536-30168128	0.406476	5.90616	0.0613026
chr6:30166680-30168314	1.01331	4.67058	0.00287258
chr6:30166860-30168435	0	0.305378	1
chr6:30166892-30169256	-0.438592	4.52073	0.131937
chr6:30166950-30174853	0	0.305378	1
chr6:30167013-30168494	0.469218	5.15098	0.162057
chr6:30167184-30168651	-0.302713	5.9951	0.152723
chr6:30167371-30168810	-0.529784	4.86645	0.0509294
chr6:30167373-30169865	0	0.305378	1
chr6:30167743-30168841	-0.150489	8.10263	0.241658
chr6:30168138-30169034	0.695863	5.18635	0.0211009
chr6:30168189-30170339	-1.33731	3.81744	0.00861597
chr6:30168195-30175423	0.178736	5.91084	0.406795
chr6:30168233-30169178	0.109071	6.26518	0.562851
chr6:30168371-30169773	0.21503	6.20163	0.273918
chr6:30168436-30172255	-0.613759	6.49846	0.00239856
chr6:30168460-30169874	0.217124	8.41035	0.0705284
chr6:30168578-30170253	-1.21852	2.55954	0.0294221
chr6:30168638-30172428	1.70208	4.78649	0.00016182
chr6:30168692-30170596	0.431149	5.77245	0.119237
chr6:30168817-30171562	0	0.305378	1
chr6:30168834-30178237	-0.217919	6.61588	0.200188
chr6:30168859-30172690	0.0940941	7.01946	0.549881
chr6:30169033-30171945	0.0299996	6.75825	0.855128
chr6:30169078-30173147	-0.926062	5.47303	0.000392067
chr6:30169186-30172061	-0.481449	3.2117	0.259061
chr6:30169761-30172206	-0.0431777	4.01774	0.897556
chr6:30169774-30173851	0.170908	4.98325	0.507433
chr6:30169870-30172374	-0.560145	7.72318	0.000600421
chr6:30170238-30172669	0.0704239	6.81179	0.664342
chr6:30170338-30174159	0.46617	5.78935	0.04021
chr6:30170361-30173050	0.0638672	6.44199	0.719223
chr6:30171507-30173100	0.498347	5.2199	0.0445684
chr6:30171929-30173192	0	0.305378	1
chr6:30172056-30173638	0.0527199	8.58718	0.647646
chr6:30172197-30173731	-0.240845	6.24494	0.211607
chr6:30172207-30174825	-0.118073	6.26223	0.535765
chr6:30172258-30179364	0.112323	6.81489	0.488453
chr6:30172373-30173862	-0.716932	5.48691	0.00680274
chr6:30172442-30175332	-0.240576	7.21586	0.114211
chr6:30172614-30173972	0	0.305378	1
chr6:30172689-30176098	-0.828623	5.43737	0.00398191
chr6:30172737-30174096	0.737931	5.63072	0.00158132
chr6:30173103-30174271	0.226177	5.13085	0.360894
chr6:30173118-30176104	1.60542	3.58458	0.000452186
chr6:30173189-30174596	0	0.305378	1
chr6:30173197-30180782	0.282393	8.13693	0.0278196
chr6:30173340-30174808	-0.642004	5.38812	0.00952098
chr6:30173669-30174801	0.000990876	8.52615	0.993357
chr6:30173850-30176805	-0.0782333	6.26749	0.680889
chr6:30173861-30175192	-0.276737	6.15942	0.160888
chr6:30173869-30180802	-0.490021	5.25167	0.0512762
chr6:30173973-30175213	0.377504	3.77664	0.344053
chr6:30174077-30175331	0.0196238	5.92381	0.927569
chr6:30174106-30178070	-0.0901494	6.08611	0.660604
chr6:30174207-30175452	0.0128097	7.65383	0.927485
chr6:30174414-30175668	0.0530969	3.24869	0.897146
chr6:30174648-30175727	0.0921066	7.27713	0.540676
chr6:30174796-30176014	0	0.305378	1
chr6:30174802-30178106	1.08501	4.92909	0.00138297
chr6:30174852-30181412	0.208679	6.87112	0.195035
chr6:30174977-30176054	-0.149773	8.46281	0.206972
chr6:30175211-30176537	0.68631	1.80306	0.345304
chr6:30175292-30179243	-0.254609	6.88823	0.111613
chr6:30175325-30176770	0	0.305378	1
chr6:30175344-30181847	0.146765	4.5595	0.60729
chr6:30175429-30176771	0.348524	8.47444	0.00375271
chr6:30175520-30179246	-0.651678	5.77255	0.00471505
chr6:30175563-30176956	0.24962	8.07421	0.0536786
chr6:30175684-30177426	0.283781	5.96666	0.178513
chr6:30175957-30177447	-0.329998	2.62032	0.519899
chr6:30176053-30178063	0.265201	5.03998	0.297395
chr6:30176087-30179731	0.127744	7.68449	0.431785
chr6:30176345-30178177	0.290897	8.586	0.0117851
chr6:30176529-30178341	-0.353061	4.65434	0.208496
chr6:30176770-30178802	-0.0439839	6.71948	0.815128
chr6:30176791-30180768	0.638889	7.13759	0.00032719
chr6:30176950-30179117	-0.89687	3.97632	0.0220636
chr6:30176980-30182515	-0.0806497	8.42283	0.504048
chr6:30177287-30179218	-0.0635328	8.51567	0.592799
chr6:30177433-30179372	0	0.305378	1
chr6:30177491-30181030	0.149093	6.49506	0.400345
chr6:30178034-30179725	-0.224479	9.13537	0.0404288
chr6:30178073-30181279	0.524672	5.53053	0.0389574
chr6:30178188-30180245	0.0572948	3.51742	0.899106
chr6:30178249-30183223	-0.575808	3.67015	0.124042
chr6:30178340-30180556	-0.62923	5.02335	0.0187313
chr6:30178342-30181490	0.0419503	4.7421	0.87644
chr6:30178727-30180740	0.851803	5.80641	0.000569887
chr6:30178982-30180795	-1.83609	2.80804	0.00290874
chr6:30179232-30181022	0.261289	8.6911	0.0206203
chr6:30179245-30181803	-0.269673	4.67791	0.331741
chr6:30179347-30181024	0	0.305378	1
chr6:30179700-30181194	-1.11652	2.75142	0.0310093
chr6:30179730-30182490	1.18773	3.61036	0.00288808
chr6:30179780-30187197	0	0.305378	1
chr6:30179986-30181278	0.296175	7.29103	0.0497115
chr6:30180250-30181417	-0.256161	5.23228	0.303923
chr6:30180664-30181500	-0.513315	6.61784	0.00274159
chr6:30180747-30183131	-0.00284791	5.11404	0.990961
chr6:30180782-30181639	-0.493359	4.78195	0.0708095
chr6:30180811-30187314	0	0.305378	1
chr6:30180905-30181775	0	0.305378	1
chr6:30181023-30182091	0.635975	3.60736	0.0854309
chr6:30181029-30183454	-0.127139	7.42377	0.388441
chr6:30181142-30182144	0	0.305378	1
chr6:30181253-30182278	0.063476	7.72499	0.649715
chr6:30181265-30183818	-0.0382454	6.46627	0.829845
chr6:30181313-30193382	-0.1627	6.51043	0.355158
chr6:30181388-30182351	-0.200052	8.06313	0.125106
chr6:30181488-30182489	-1.13885	5.96749	0.000122946
chr6:30181501-30184187	-0.140196	5.10122	0.578126
chr6:30181612-30182668	-0.103971	6.39283	0.565412
chr6:30181763-30184631	0.12366	3.48212	0.747869
chr6:30181771-30183044	-0.180278	4.91345	0.49197
chr6:30181822-30199337	0.567466	2.7053	0.240222
chr6:30181887-30183130	-0.387027	6.70347	0.0212994
chr6:30182106-30183203	0.198884	5.05236	0.429767
chr6:30182226-30183440	0.512044	5.89434	0.0185043
chr6:30182350-30183747	-0.374861	8.68873	0.000924839
chr6:30182354-30186461	0	0.305378	1
chr6:30182445-30184046	-3.49902	0.780014	0.0521867
chr6:30182497-30199651	-0.314313	7.52491	0.0323379
chr6:30182620-30184176	0.212546	5.5179	0.374974
chr6:30182999-30184243	0.480935	4.69147	0.124561
chr6:30183101-30184385	0.573003	4.00681	0.0850643
chr6:30183111-30187190	0	0.305378	1
chr6:30183186-30206544	-0.937998	3.76387	0.0123523
chr6:30183202-30184604	-0.599536	6.04996	0.00418055
chr6:30183439-30185126	-0.341311	6.26442	0.074956
chr6:30183442-30187435	-0.036801	4.13662	0.910044
chr6:30183746-30185286	0.384817	4.59623	0.174493
chr6:30183778-30193238	0.104885	8.03031	0.426355
chr6:30184012-30185826	-6.9314	2.72372	0.000467481
chr6:30184085-30193248	0	0.305378	1
chr6:30184132-30185924	-0.403362	6.941	0.0118057
chr6:30184230-30209956	-0.12163	5.71846	0.597059
chr6:30184237-30186295	-0.400073	4.28063	0.20102
chr6:30184336-30193738	-2.0445	1.21944	0.0752277
chr6:30184345-30186455	0.215411	5.90669	0.325162
chr6:30184587-30187030	-0.174033	6.87851	0.284746
chr6:30184689-30187168	-0.939894	3.80357	0.033143
chr6:30185279-30187251	0	0.305378	1
chr6:30185384-30187416	-0.734091	4.20441	0.0475279
chr6:30185827-30188676	-0.133778	7.26915	0.373343
chr6:30186293-30189078	-0.658956	4.69979	0.0224448
chr6:30186446-30189220	0.119989	6.17193	0.545361
chr6:30186460-30194305	0	0.305378	1
chr6:30186964-30190476	0	0.305378	1
chr6:30187108-30190931	0.535838	3.86081	0.12346
chr6:30187203-30195401	0.4228	7.59745	0.00300726
chr6:30187241-30191571	-0.0205176	5.76411	0.928324
chr6:30187316-30225081	0.537622	5.90409	0.0136745
chr6:30187374-30192706	-0.607223	2.12301	0.369632
chr6:30187434-30195555	0.397295	9.59821	7.37224e-05
chr6:30188211-30193204	-0.171922	6.44284	0.333114
chr6:30188695-30193346	0	0.305378	1
chr6:30189217-30193452	-0.998672	5.97289	0.000124832
chr6:30190470-30193731	0	0.305378	1
chr6:30190825-30193884	0.433505	3.70106	0.229605
chr6:30190932-30195810	-1.35427	3.2462	0.0171707
chr6:30190962-30194257	0.229404	7.85444	0.0915121
chr6:30192594-30194774	0.0869202	11.3616	0.257845
chr6:30193155-30194774	-0.223646	6.78068	0.291306
chr6:30193234-30227289	0	0.305378	1
chr6:30193247-30196264	0	0.305378	1
chr6:30193301-30194949	-1.29712	5.3882	7.90778e-05
chr6:30193423-30195361	0.0759456	6.36904	0.674198
chr6:30193730-30195387	0.185676	6.02243	0.366789
chr6:30193737-30199176	-0.630747	5.20935	0.0123867
chr6:30193833-30195554	0.0554349	7.23582	0.715318
chr6:30194264-30195713	0	0.305378	1
chr6:30194306-30228273	0.12628	6.90829	0.431377
chr6:30194315-30199650	2.14654	2.23064	0.00428629
chr6:30194377-30195860	1.49358	3.67512	0.00356626
chr6:30194783-30196082	-0.755099	6.0589	0.000472489
chr6:30194933-30196124	0.216942	3.43749	0.57663
chr6:30194936-30201698	0	0.305378	1
chr6:30195189-30196204	-0.0733233	5.17053	0.76678
chr6:30195392-30202367	-0.794262	2.31807	0.178848
chr6:30195393-30196398	0	0.305378	1
chr6:30195551-30196616	0.0330858	8.75736	0.765234
chr6:30195712-30197648	0.23941	6.96304	0.127763
chr6:30195795-30206478	0.228569	3.55446	0.543908
chr6:30195860-30197828	0	0.305378	1
chr6:30195977-30198610	2.22501	3.35476	9.25098e-05
chr6:30196083-30198875	-0.535881	6.07849	0.00944238
chr6:30196203-30199141	-0.857023	3.43429	0.0395163
chr6:30196205-30206480	0.230964	5.01907	0.403203
chr6:30196334-30199320	-0.247894	7.33507	0.0972124
chr6:30196456-30199508	0.741893	5.38993	0.00254514
chr6:30197159-30199646	-0.64013	5.08317	0.0159612
chr6:30197771-30199895	0.545493	4.07404	0.094834
chr6:30198474-30200387	-0.264174	7.30411	0.0799359
chr6:30198659-30200801	0.446967	5.50457	0.059696
chr6:30199079-30201184	0.117562	7.58008	0.473407
chr6:30199175-30209473	-0.709997	4.55826	0.0232633
chr6:30199288-30201684	1.20296	5.26023	0.000697763
chr6:30199356-30229956	-1.45043	3.77972	0.007497
chr6:30199463-30202140	0.494559	5.65618	0.032898
chr6:30199627-30202213	0	0.305378	1
chr6:30199647-30209648	-1.02325	5.32456	0.000618089
chr6:30199714-30202360	0.652839	6.1877	0.00465881
chr6:30200045-30202883	0	0.305378	1
chr6:30200810-30204475	0.499728	5.83716	0.0255515
chr6:30201146-30204591	0.0341194	3.66408	0.927255
chr6:30201630-30204928	0.35949	5.69635	0.117849
chr6:30201685-30209856	0.0704844	6.03371	0.733447
chr6:30201687-30231151	-1.83849	0.440019	0.32967
chr6:30201957-30205436	-0.693843	4.78199	0.0206487
chr6:30202154-30205864	-0.413805	5.00732	0.111388
chr6:30202348-30206182	0.109141	8.89367	0.316097
chr6:30202366-30211752	-0.573066	3.93546	0.104293
chr6:30202580-30206358	-0.24339	6.22343	0.20716
chr6:30203603-30206477	-0.07664	4.98926	0.766924
chr6:30204490-30206546	0.548696	5.32526	0.0239322
chr6:30204903-30207512	0	0.305378	1
chr6:30204933-30212345	0.123275	5.22571	0.615596
chr6:30205384-30209022	0.558539	6.16042	0.00492288
chr6:30205848-30209425	0	0.305378	1
chr6:30206065-30209481	0	0.305378	1
chr6:30206262-30209631	-1.31528	2.46505	0.0243111
chr6:30206415-30209763	0.000812182	8.60679	0.994438
chr6:30206493-30212581	-1.83861	0.440192	0.329654
chr6:30206526-30209887	-0.0186595	4.40084	0.95177
chr6:30207523-30210077	-6.90146	2.70055	0.000345888
chr6:30207567-30222734	-0.20449	6.89247	0.204073
chr6:30208447-30210624	0.0316532	6.55751	0.854004
chr6:30209034-30210824	0.643727	5.34639	0.0080722
chr6:30209426-30211683	0.135099	4.11361	0.676402
chr6:30209624-30212237	-0.777559	4.62612	0.0191251
chr6:30209637-30222743	0.168605	6.42717	0.346472
chr6:30209770-30212253	-0.405021	4.66137	0.231477
chr6:30209825-30225032	-0.645094	4.84056	0.0174739
chr6:30209872-30212362	0.607142	6.07535	0.00959192
chr6:30209929-30232024	0.0462394	7.43628	0.754268
chr6:30209975-30212580	3.55657	2.28221	8.90715e-05
chr6:30210068-30227010	2.23706	3.50494	0.000118454
chr6:30210301-30215368	-0.219889	5.3373	0.368991
chr6:30210789-30215658	0.191546	4.98041	0.450976
chr6:30211670-30222341	-0.0536732	4.76867	0.843012
chr6:30211742-30227254	0.00392297	4.9431	0.9879
chr6:30212042-30222354	0	0.305378	1
chr6:30212253-30222733	0.195188	7.21757	0.20022
chr6:30212347-30224195	-0.490519	5.39481	0.0459058
chr6:30212363-30228014	-0.204177	6.20478	0.296859
chr6:30212494-30224367	0.503212	6.24897	0.00830035
chr6:30212577-30228171	0.301363	4.87589	0.253627
chr6:30212670-30225016	-6.6648	2.51749	0.000479702
chr6:30215443-30225530	0.664236	2.86526	0.201985
chr6:30215646-30226576	-0.890506	3.67358	0.0531181
chr6:30222335-30226887	0.322443	7.92314	0.0164602
chr6:30222714-30226932	-0.200843	7.75535	0.148782
chr6:30222728-30228496	-0.205728	6.40968	0.253887
chr6:30222744-30232955	-0.283922	5.36158	0.318089
chr6:30224194-30227172	0.44798	7.50397	0.00219226
chr6:30224306-30227292	0	0.305378	1
chr6:30225015-30227395	0.0228826	10.769	0.781566
chr6:30225037-30228796	0.0348642	6.51005	0.841222
chr6:30225448-30227796	0.0121803	6.83891	0.93956
chr6:30226292-30227988	0.251582	8.29616	0.0414303
chr6:30226614-30228112	-0.968425	5.15603	0.000785597
chr6:30226916-30228272	-0.00659666	8.28848	0.957744
chr6:30226950-30229653	0	0.305378	1
chr6:30227185-30228416	-0.54109	5.44865	0.0268879
chr6:30227201-30229958	-0.14717	8.5478	0.206629
chr6:30227288-30235207	-0.00649666	6.66749	0.969221
chr6:30227291-30228719	-0.133613	8.53879	0.252294
chr6:30227394-30228795	-0.0595666	7.86268	0.660347
chr6:30227791-30228992	-0.102794	7.67827	0.465598
chr6:30227803-30229960	0.174927	6.50788	0.313363
chr6:30228001-30229584	1.29815	3.98242	0.000725228
chr6:30228125-30229733	0.198765	7.86917	0.142468
chr6:30228145-30230179	-1.41598	4.82092	0.000143095
chr6:30228174-30256579	0.741225	5.25784	0.00415166
chr6:30228248-30229893	0.331345	4.05205	0.315108
chr6:30228415-30230127	0	0.305378	1
chr6:30228502-30230997	0.485045	5.82601	0.0303604
chr6:30228667-30230284	0.671134	6.74823	0.00574412
chr6:30228725-30231244	0.395288	3.30917	0.379486
chr6:30228794-30230453	-0.255224	4.94592	0.330389
chr6:30228883-30257922	-0.47795	7.04452	0.00247291
chr6:30228991-30230649	0.248395	7.78404	0.0698802
chr6:30229008-30232001	0.0679	6.982	0.668509
chr6:30229566-30230756	0.271699	5.83974	0.220508
chr6:30229732-30230832	-1.95304	3.98698	0.0011002
chr6:30229734-30232214	0.133173	3.79742	0.738107
chr6:30229865-30230971	0.325638	7.42901	0.027179
chr6:30229959-30232716	-0.428695	6.43086	0.0171498
chr6:30230072-30231163	0	0.305378	1
chr6:30230177-30232954	1.09257	3.90908	0.00899825
chr6:30230214-30231243	-0.0735071	6.83862	0.651086
chr6:30230379-30231692	0.638503	4.53716	0.0254258
chr6:30230491-30231975	0.12032	7.31217	0.421499
chr6:30230649-30232159	0.746286	4.47401	0.0125045
chr6:30230811-30232234	0.503807	3.47948	0.277597
chr6:30230955-30232662	0	0.305378	1
chr6:30230972-30233178	0.131266	6.32077	0.47962
chr6:30231002-30260998	0.300624	5.71932	0.191094
chr6:30231109-30232671	0	0.305378	1
chr6:30231184-30234196	-0.50413	7.96115	0.000341611
chr6:30231227-30232846	0	0.305378	1
chr6:30231670-30232937	-0.135605	6.65912	0.420563
chr6:30231967-30233122	-0.0193186	6.86191	0.903962
chr6:30232000-30235153	-0.00715806	4.90198	0.979666
chr6:30232002-30261579	-0.206974	7.43198	0.163508
chr6:30232133-30233246	0.245551	6.91615	0.123677
chr6:30232213-30236771	-0.311087	3.90414	0.418112
chr6:30232233-30234022	-0.274723	5.41746	0.262437
chr6:30232447-30234082	-6.19274	2.1694	0.000689566
chr6:30232663-30234136	0.76352	4.03917	0.0222789
chr6:30232694-30244032	0.144552	5.36346	0.551709
chr6:30232707-30262327	-1.83849	0.440019	0.32967
chr6:30232804-30234375	0	0.305378	1
chr6:30232939-30244641	0.043558	5.50026	0.874137
chr6:30232941-30234434	0	0.305378	1
chr6:30233097-30234637	-0.19544	6.05885	0.339895
chr6:30233147-30244704	0	0.305378	1
chr6:30233226-30234835	1.24769	3.90889	0.00525602
chr6:30233305-30264004	0.26993	5.15756	0.274264
chr6:30233459-30234985	-0.206306	5.90711	0.342461
chr6:30234042-30235147	-0.354328	5.96966	0.0991631
chr6:30234142-30235208	0.431511	4.7512	0.108256
chr6:30234153-30256543	-0.792304	5.07177	0.0147881
chr6:30234280-30235648	-0.127088	3.3025	0.755543
chr6:30234396-30235735	-0.389218	2.64069	0.444947
chr6:30234608-30236664	0.983216	2.95629	0.0334576
chr6:30234724-30236726	-1.72216	1.85357	0.03924
chr6:30234945-30237503	0.244225	3.19348	0.564351
chr6:30235094-30237510	-1.14161	5.59808	8.23649e-05
chr6:30235161-30256924	-0.447107	6.43955	0.0195098
chr6:30235217-30237927	-0.248883	6.15029	0.21259
chr6:30235571-30240388	-0.318312	5.16239	0.204144
chr6:30235672-30242444	0.194586	9.30972	0.0547996
chr6:30236585-30243109	0.249746	7.14994	0.153557
chr6:30236708-30243640	-0.477741	3.06274	0.282113
chr6:30236755-30257550	-0.18321	8.94263	0.0888147
chr6:30236945-30244028	0.162001	7.90256	0.228419
chr6:30237518-30244249	0.148443	6.79107	0.360784
chr6:30237784-30244413	-1.83861	0.440192	0.329654
chr6:30239969-30244458	-0.173164	6.33997	0.352465
chr6:30240374-30244632	0.421168	6.03228	0.041833
chr6:30243110-30257801	-0.227083	6.39549	0.209788
chr6:30243114-30244737	0.444283	3.64066	0.229969
chr6:30243637-30245077	-0.439953	4.18504	0.25531
chr6:30243997-30245227	-0.0884185	5.56747	0.708332
chr6:30244040-30258063	-3.12585	0.675636	0.0922335
chr6:30244132-30251171	-0.286929	3.1562	0.502713
chr6:30244240-30252879	-5.56613	1.74777	0.00181586
chr6:30244433-30256082	-0.0566589	8.80658	0.606714
chr6:30244606-30256523	-0.562549	6.53178	0.0013446
chr6:30244692-30260590	0	0.305378	1
chr6:30244707-30256553	0.82809	5.55334	0.0042216
chr6:30244864-30256772	0.487527	4.33749	0.130059
chr6:30245197-30256900	0.0846675	8.15061	0.508093
chr6:30246174-30256964	-4.5962	1.2081	0.00898558
chr6:30251572-30257276	0.930967	5.36003	0.00372999
chr6:30255013-30257383	0.223906	8.58377	0.0550242
chr6:30256278-30257482	0.176569	5.79655	0.43304
chr6:30256524-30257620	0.238763	6.05743	0.244155
chr6:30256556-30260974	0	0.305378	1
chr6:30256585-30269683	0.105331	5.89378	0.626149
chr6:30256717-30257729	-0.0586718	4.74214	0.830346
chr6:30256803-30261553	0.143924	7.09419	0.35728
chr6:30256823-30257881	-0.311767	9.11683	0.00300072
chr6:30256929-30258048	0.291017	4.88861	0.264108
chr6:30257127-30258245	0.362787	5.36149	0.137706
chr6:30257337-30258344	-0.283945	8.54588	0.0154385
chr6:30257466-30259319	-0.112143	7.23312	0.460694
chr6:30257505-30261976	-0.363127	4.66839	0.232108
chr6:30257590-30259523	0.0310493	8.03743	0.8129
chr6:30257728-30259737	0.627411	0.803598	0.625041
chr6:30257777-30262092	0.400024	5.49404	0.0915404
chr6:30257880-30259855	1.32137	4.58373	0.000217179
chr6:30257921-30270547	-0.124498	6.62706	0.465049
chr6:30258024-30260068	-1.62064	4.25109	0.000519548
chr6:30258053-30262325	0.0457319	6.18045	0.815378
chr6:30258132-30260547	-0.519452	8.03118	0.000181229
chr6:30258234-30260582	0.0850211	6.24708	0.653944
chr6:30258334-30260916	0.336906	4.47735	0.251385
chr6:30259519-30260961	-0.068253	9.02276	0.521026
chr6:30259652-30261249	0.00346223	4.5225	0.991188
chr6:30259847-30261514	0	0.305378	1
chr6:30260018-30261680	-1.49517	4.14211	0.000531728
chr6:30260218-30261772	-1.47386	4.31266	0.0013076
chr6:30260548-30261961	0.113224	5.9343	0.594803
chr6:30260589-30262964	-0.842625	5.39427	0.00390559
chr6:30260633-30272217	-0.14132	7.27605	0.347015
chr6:30260649-30262039	0.156918	7.16759	0.308806
chr6:30260968-30262164	0	0.305378	1
chr6:30260983-30263776	-0.0928938	6.95664	0.558584
chr6:30261154-30262324	-0.0492448	7.10297	0.751865
chr6:30261505-30262409	0.10651	5.93107	0.621117
chr6:30261549-30263996	-0.140479	6.61284	0.407215
chr6:30261554-30273354	-0.355287	4.15492	0.280287
chr6:30261653-30262591	0.0606607	7.31033	0.68527
chr6:30261771-30262871	-0.172751	2.17445	0.805336
chr6:30261795-30269533	1.11404	4.34943	0.00124742
chr6:30261904-30262886	0.0921029	4.70296	0.73778
chr6:30262052-30263495	0	0.305378	1
chr6:30262058-30269665	1.04722	5.04212	0.00123
chr6:30262093-30274271	0.0435621	9.78861	0.641207
chr6:30262163-30263776	0	0.305378	1
chr6:30262244-30270460	0.192886	6.93987	0.223841
chr6:30262279-30263914	0.242106	7.80417	0.0770626
chr6:30262378-30264087	0.284896	5.99952	0.172699
chr6:30262473-30270868	-1.44092	3.94123	0.00285379
chr6:30262567-30264238	0.36197	5.73092	0.111624
chr6:30262705-30264789	0	0.305378	1
chr6:30262868-30265084	0.257027	7.1344	0.0969281
chr6:30263337-30265801	1.36641	4.43903	0.000324559
chr6:30263761-30266487	0	0.305378	1
chr6:30263777-30271320	-0.0895641	4.43702	0.761244
chr6:30263871-30274880	0.65934	3.8286	0.0747462
chr6:30263926-30267284	-0.152466	4.33341	0.619144
chr6:30263995-30272134	0.323435	7.20219	0.0347306
chr6:30264056-30269476	-0.0347976	6.68516	0.834345
chr6:30264172-30269480	0.150787	5.18092	0.543458
chr6:30264239-30272396	0.00537981	8.21334	0.965889
chr6:30264683-30269672	-0.00120722	8.62189	0.991606
chr6:30265069-30270079	-0.338282	6.04969	0.100609
chr6:30265499-30270243	-0.0952293	5.73971	0.678651
chr6:30265793-30270368	-0.163277	4.57924	0.593659
chr6:30266477-30270495	-0.721044	4.06337	0.0864633
chr6:30269032-30270590	-0.0866894	6.25351	0.646931
chr6:30269463-30270773	0	0.305378	1
chr6:30269524-30273346	-0.65751	6.92139	0.000110552
chr6:30269658-30270954	-0.0474431	7.8627	0.726106
chr6:30269668-30275881	0.0103501	1.93695	0.98741
chr6:30270078-30271133	-0.157612	7.83123	0.248742
chr6:30270229-30271310	-0.115797	7.16429	0.449368
chr6:30270348-30271626	-0.109137	7.41516	0.460489
chr6:30270446-30273343	-0.395836	5.83634	0.0802237
chr6:30270488-30271777	0.550784	7.77622	0.00104958
chr6:30270560-30277812	-1.31509	4.09295	0.0022644
chr6:30270589-30272096	0.246087	4.80064	0.357342
chr6:30270776-30272096	0.0644381	6.91257	0.68653
chr6:30270778-30274254	0.00813177	5.21167	0.973735
chr6:30270935-30272204	-0.103106	8.93342	0.342886
chr6:30271061-30272339	-0.0878519	5.89213	0.684558
chr6:30271125-30274269	-0.00230901	8.98641	0.982771
chr6:30271225-30272802	0.0615214	7.69306	0.658951
chr6:30271568-30273103	-1.0172	2.55633	0.0632063
chr6:30271759-30273313	-0.201519	4.52513	0.489618
chr6:30271967-30273357	-0.323019	7.50133	0.0871913
chr6:30272094-30273468	-0.0721327	6.46736	0.681304
chr6:30272119-30274850	-1.707	3.43641	0.000995549
chr6:30272177-30279260	0.784161	7.02716	8.0505e-05
chr6:30272194-30273553	-0.218021	5.16776	0.379669
chr6:30272344-30273873	0.0385234	7.58884	0.788002
chr6:30272373-30274878	-0.286034	6.82382	0.0793774
chr6:30272775-30273963	0.122864	6.31988	0.508284
chr6:30272860-30275161	0.169169	6.96834	0.28527
chr6:30273038-30274253	-2.04414	3.5825	0.000246905
chr6:30273251-30274546	-0.878978	4.68306	0.00307411
chr6:30273336-30275477	-0.194669	7.24911	0.198392
chr6:30273342-30274603	0	0.305378	1
chr6:30273358-30283372	-0.0757301	5.88241	0.72917
chr6:30273444-30274862	-0.419032	5.00998	0.168998
chr6:30273545-30275025	0.516637	2.83226	0.26381
chr6:30273820-30275100	-1.04793	4.94961	0.00240769
chr6:30273898-30275718	-0.455483	3.73438	0.293331
chr6:30273947-30275249	0.234193	5.46121	0.330683
chr6:30274248-30275379	0.237274	4.15217	0.477673
chr6:30274268-30276127	-0.939663	3.68851	0.0199403
chr6:30274270-30284282	0.061619	5.52518	0.795837
chr6:30274398-30275707	-0.146699	5.85497	0.505786
chr6:30274579-30275866	0.481226	6.58331	0.021358
chr6:30274662-30277754	0.165159	7.49738	0.257525
chr6:30274861-30276052	-0.0555256	5.66244	0.811807
chr6:30274863-30277767	-0.954334	5.7818	0.00478055
chr6:30274879-30286738	1.02916	4.605	0.00186733
chr6:30274960-30276153	0	0.305378	1
chr6:30275099-30277142	-0.0942218	5.43079	0.695673
chr6:30275111-30279253	0.0576273	8.4179	0.634392
chr6:30275241-30277225	-0.160284	9.25	0.116669
chr6:30275390-30277378	0.0749515	9.28228	0.45993
chr6:30275398-30279712	0.557646	5.8496	0.0115247
chr6:30275658-30277749	-0.462012	4.99522	0.0771439
chr6:30275722-30280403	0.375686	4.31666	0.247569
chr6:30275736-30293976	0.386474	7.02174	0.0139493
chr6:30275832-30277861	-7.7303	3.37413	0.000100068
chr6:30276028-30277994	-0.286771	6.13084	0.153923
chr6:30276126-30280486	0.239365	7.55933	0.0945071
chr6:30276128-30278170	0.263683	5.1861	0.282661
chr6:30277096-30279096	0.0673086	7.8201	0.621939
chr6:30277219-30279113	0.296315	7.56819	0.0398173
chr6:30277237-30281374	1.50032	3.24396	0.00295243
chr6:30277387-30279246	0.413297	2.34309	0.451266
chr6:30277725-30279532	-0.0354943	6.35512	0.847036
chr6:30277748-30281511	0.110768	5.35584	0.648516
chr6:30277803-30293978	0.00850602	6.89543	0.958001
chr6:30277855-30279709	0.282779	6.22092	0.14105
chr6:30277992-30280173	0.12954	5.02461	0.610167
chr6:30278103-30280388	0.369515	5.63347	0.113538
chr6:30278888-30280497	3.28451	1.73166	0.000616286
chr6:30279098-30280633	0.369993	7.34445	0.0130755
chr6:30279238-30281263	1.01609	5.61623	0.000316928
chr6:30279247-30281860	0.692538	4.40702	0.0638794
chr6:30279259-30294684	0.0939195	10.985	0.243874
chr6:30279537-30281305	0.0512507	6.46718	0.769743
chr6:30279708-30281510	-0.607245	5.4488	0.0153538
chr6:30279724-30282237	-4.43366	1.13242	0.0138913
chr6:30280159-30281810	0.458286	3.3293	0.25089
chr6:30280186-30282793	-0.302651	7.46162	0.0395073
chr6:30280392-30282007	0.387612	6.02093	0.0634188
chr6:30280408-30283241	-0.981124	5.79587	0.000617094
chr6:30280496-30282200	-0.425661	5.89704	0.0510709
chr6:30280626-30282223	0.749793	7.58081	3.50808e-05
chr6:30280655-30283258	-0.400444	6.49388	0.0291719
chr6:30280914-30282349	0.439849	9.21939	2.38425e-05
chr6:30281304-30282443	-0.211767	5.90354	0.446109
chr6:30281381-30284002	0.839162	3.58328	0.0421636
chr6:30281480-30282710	-0.088716	4.64771	0.749485
chr6:30281777-30282752	0	0.305378	1
chr6:30281803-30284105	-0.00990685	8.16588	0.938076
chr6:30281878-30282991	0.977579	5.42554	0.00160689
chr6:30282051-30283233	-0.773087	3.52828	0.0495532
chr6:30282194-30283352	-0.867411	5.44601	0.00334522
chr6:30282232-30285382	-0.519657	5.41943	0.0337673
chr6:30282328-30283568	-0.143917	8.02556	0.274161
chr6:30282444-30286599	0.0205982	6.95536	0.897659
chr6:30282450-30283705	-0.0365352	7.52608	0.801302
chr6:30282554-30283957	0.153905	3.62305	0.677222
chr6:30282751-30283975	0.0545704	4.61776	0.847358
chr6:30282944-30284083	-0.543568	5.80531	0.016497
chr6:30283029-30289103	-1.27174	3.33716	0.00610941
chr6:30283188-30284235	2.66516	3.76592	1.56375e-05
chr6:30283246-30291436	0	0.305378	1
chr6:30283265-30295185	0.142882	2.91161	0.755197
chr6:30283351-30284403	0	0.305378	1
chr6:30283529-30285284	-0.823873	5.37139	0.00291395
chr6:30283659-30285308	-3.65005	2.09802	0.000746428
chr6:30283714-30293060	0.892753	5.12812	0.0054616
chr6:30283754-30285636	0.616645	5.60736	0.00824779
chr6:30283963-30285759	0.221433	5.32369	0.362618
chr6:30284084-30293184	-0.520317	7.54574	0.00127044
chr6:30284093-30285787	-0.152313	6.37056	0.404818
chr6:30284233-30286286	1.33382	4.05198	0.0056795
chr6:30284287-30296071	0.143422	4.57263	0.615893
chr6:30284366-30286577	-0.111189	8.14322	0.384564
chr6:30284459-30293581	0.270494	6.35965	0.139017
chr6:30284761-30286734	0.71128	3.29818	0.24033
chr6:30285299-30287434	1.29046	4.00889	0.000722737
chr6:30285439-30287557	-4.59609	1.20795	0.013685
chr6:30285644-30287738	-0.450021	7.32891	0.00280072
chr6:30285746-30287762	-0.189189	7.82002	0.168827
chr6:30285953-30288743	0.034019	5.1928	0.890717
chr6:30286576-30289014	0.0262641	7.17705	0.863963
chr6:30286577-30293985	-0.357522	7.49198	0.0146373
chr6:30286649-30297299	-0.107242	6.66151	0.522886
chr6:30286733-30289644	0.0127848	7.65495	0.928132
chr6:30287117-30289845	-0.672881	2.24349	0.262775
chr6:30287546-30290036	0.145146	6.88525	0.366751
chr6:30287561-30294199	-0.127602	7.67478	0.366468
chr6:30287646-30290232	-0.0161623	7.66006	0.908663
chr6:30287748-30290297	-0.104199	6.16209	0.600146
chr6:30288520-30291339	0.37807	7.94993	0.004641
chr6:30289026-30291400	0.0392692	8.35349	0.749482
chr6:30289493-30291806	0.0453481	5.3715	0.85286
chr6:30289734-30292263	-2.01472	4.20247	0.000124776
chr6:30289992-30293012	-1.10557	3.01181	0.171662
chr6:30290101-30293056	-0.480001	6.29414	0.0731086
chr6:30290296-30293152	-0.3893	6.37069	0.033865
chr6:30290411-30293259	-0.577596	7.15105	0.000248453
chr6:30291344-30293514	0.151877	7.58935	0.284501
chr6:30291409-30294662	-0.641286	7.19654	0.000280783
chr6:30291787-30293775	0.162855	5.19995	0.514527
chr6:30291812-30295027	-1.16547	4.16292	0.00177145
chr6:30292258-30293934	-0.251015	4.79928	0.358203
chr6:30292764-30294044	0.0533591	5.60121	0.820731
chr6:30293012-30294168	-0.0140236	8.62955	0.902864
chr6:30293156-30294302	0	0.305378	1
chr6:30293156-30295437	-0.895662	3.74511	0.0624517
chr6:30293255-30298702	-0.112933	6.02518	0.588827
chr6:30293258-30294627	0.387914	5.7826	0.0884461
chr6:30293513-30295006	0.390584	6.93465	0.0140697
chr6:30293575-30295998	0.244051	3.37387	0.540243
chr6:30293634-30295008	0.211545	7.74257	0.126502
chr6:30293909-30295121	-6.24234	2.20469	0.000866319
chr6:30293959-30297162	0.0772799	5.85948	0.726569
chr6:30293977-30300012	-0.0920291	6.67281	0.64555
chr6:30294043-30295330	0	0.305378	1
chr6:30294167-30295426	2.38924	0.452186	0.16395
chr6:30294198-30297338	0.0512748	9.65381	0.591342
chr6:30294301-30295749	-0.0574274	7.09879	0.709376
chr6:30294626-30295897	-6.33762	2.27374	0.000506014
chr6:30294642-30297574	0	0.305378	1
chr6:30294668-30303824	0.688038	5.02431	0.00817681
chr6:30294878-30295962	-0.646949	4.75443	0.0204258
chr6:30295007-30296383	-0.482166	3.21239	0.258352
chr6:30295026-30298241	-0.465824	5.15498	0.0644877
chr6:30295116-30296721	0.426784	6.6164	0.0120959
chr6:30295184-30307819	0.875406	6.85507	0.000845546
chr6:30295279-30296756	-1.97716	4.79587	9.12071e-05
chr6:30295339-30298676	-0.186826	5.60627	0.43017
chr6:30295434-30297083	0	0.305378	1
chr6:30295528-30297118	0.700376	4.4456	0.0172829
chr6:30295825-30297261	0.30126	4.93224	0.243372
chr6:30295967-30299823	0	0.305378	1
chr6:30295973-30297395	-4.74228	1.27983	0.00679494
chr6:30296035-30309369	0.0119237	8.0981	0.92656
chr6:30296209-30297497	0.0879316	9.43791	0.378828
chr6:30296572-30297620	-4.9962	1.4126	0.00541164
chr6:30296755-30297958	0.736878	6.04818	0.000509308
chr6:30297008-30298237	-0.0735052	5.61255	0.755676
chr6:30297114-30298516	0.169199	6.35173	0.353897
chr6:30297150-30300023	-0.000107048	5.59477	0.999483
chr6:30297257-30298659	0	0.305378	1
chr6:30297292-30309389	0	0.305378	1
chr6:30297351-30302296	0.0472336	6.15219	0.81176
chr6:30297375-30299309	-0.820664	4.63363	0.00693976
chr6:30297463-30299468	0	0.305378	1
chr6:30297573-30303545	-0.15941	7.9283	0.235618
chr6:30297582-30299749	-0.27046	7.12406	0.0808401
chr6:30297929-30299832	-1.31246	5.57084	0.0014007
chr6:30297962-30303810	-4.99598	1.4123	0.0156139
chr6:30298187-30300001	-0.394205	5.73267	0.0867131
chr6:30298373-30300821	-0.208465	7.48888	0.153926
chr6:30298655-30300947	-0.620737	4.99652	0.0472569
chr6:30298675-30307418	-0.0638151	4.72183	0.816801
chr6:30298701-30310035	-0.00494344	8.05326	0.969856
chr6:30298765-30301518	-0.250593	7.80674	0.0692159
chr6:30299467-30301912	0.411444	5.63794	0.0769844
chr6:30299472-30307814	-0.238092	7.24252	0.140091
chr6:30299604-30301994	-0.183828	8.58494	0.110871
chr6:30299816-30302290	-0.417145	6.08963	0.0413098
chr6:30299907-30308102	-0.224204	8.09162	0.0873064
chr6:30299956-30302602	0.184024	6.14794	0.357548
chr6:30300025-30310438	0.0596293	7.73879	0.665066
chr6:30300485-30302962	-1.18965	2.24388	0.0597864
chr6:30300835-30303478	0.0628341	7.38893	0.672192
chr6:30301501-30303552	0.033974	7.27404	0.821541
chr6:30301521-30308358	-0.305955	6.16743	0.123181
chr6:30301634-30303772	-0.19442	8.26508	0.12038
chr6:30301947-30303886	-0.221968	5.52133	0.355409
chr6:30302295-30307274	-0.0707713	5.49531	0.769342
chr6:30302453-30307301	0.513014	5.69958	0.0261664
chr6:30302755-30307403	0.0542231	8.61884	0.634433
chr6:30303001-30307630	-0.0756155	10.9233	0.350392
chr6:30303485-30307698	0.0954022	6.53117	0.580868
chr6:30303553-30309165	-1.83849	0.440019	0.32967
chr6:30303580-30311614	-0.180906	6.94791	0.261992
chr6:30303712-30307775	0.0743597	8.12221	0.564992
chr6:30303809-30309333	-0.277006	5.57432	0.239476
chr6:30303868-30307965	1.09881	5.08372	0.000491249
chr6:30304288-30308092	-0.496761	7.20208	0.00159711
chr6:30307307-30308305	-0.134517	8.62988	0.241955
chr6:30307361-30309538	0	0.305378	1
chr6:30307397-30308649	-0.405447	6.49577	0.0594092
chr6:30307537-30309100	0.141193	4.22211	0.656771
chr6:30307634-30309106	0.856916	5.20945	0.00135779
chr6:30307743-30309848	0	0.305378	1
chr6:30307768-30309261	0.104373	4.72148	0.72045
chr6:30307815-30313154	0	0.305378	1
chr6:30307921-30309376	0.496149	5.36748	0.040079
chr6:30308062-30309527	0.155679	7.00908	0.319442
chr6:30308093-30310026	0.379733	5.08875	0.131199
chr6:30308264-30309754	0	0.305378	1
chr6:30308360-30313377	0	0.305378	1
chr6:30308370-30310271	0.835611	6.81937	0.00018378
chr6:30308511-30309826	0.183806	5.84015	0.409483
chr6:30308703-30309982	0.0978571	5.55222	0.679862
chr6:30309101-30310125	0.138433	7.64657	0.32917
chr6:30309113-30310578	0.0647426	6.66657	0.699708
chr6:30309237-30310250	0.245325	8.37496	0.0432633
chr6:30309337-30310408	0	0.305378	1
chr6:30309343-30310657	-1.15139	4.05395	0.00220176
chr6:30309374-30314101	-0.217326	3.90633	0.529842
chr6:30309532-30311394	0.0848858	7.61081	0.55053
chr6:30309537-30310563	0	0.305378	1
chr6:30309723-30310669	0.0194337	5.55829	0.934332
chr6:30309761-30311613	0.560196	6.78077	0.000957058
chr6:30309825-30310881	-4.04081	0.967562	0.0192593
chr6:30309882-30314722	0.286868	6.31809	0.121852
chr6:30309975-30310990	0	0.305378	1
chr6:30310007-30311996	0.375064	5.39187	0.124276
chr6:30310082-30311050	-0.0563222	6.30983	0.761954
chr6:30310243-30312639	-0.0957009	6.03444	0.641478
chr6:30310244-30311391	-2.62141	0.563083	0.211577
chr6:30310406-30311608	1.09605	3.61097	0.0105458
chr6:30310431-30316049	-0.643999	5.80598	0.00455943
chr6:30310461-30313017	-0.111089	5.94358	0.604607
chr6:30310527-30311979	0	0.305378	1
chr6:30310657-30312391	0.16271	5.12456	0.512994
chr6:30310670-30313086	-0.365359	6.41806	0.0420172
chr6:30310785-30312553	0	0.305378	1
chr6:30310936-30312715	-3.49902	0.780014	0.0521867
chr6:30311055-30312835	0.140137	6.6538	0.404931
chr6:30311127-30313364	0.305231	6.11602	0.132745
chr6:30311392-30313002	-0.845622	3.56293	0.0348752
chr6:30311465-30313518	0.256405	7.19829	0.0936489
chr6:30311517-30313141	-0.103355	6.02949	0.617798
chr6:30311600-30316674	0.404768	3.57952	0.277743
chr6:30311956-30313279	0	0.305378	1
chr6:30311980-30314062	0.310961	5.52247	0.18735
chr6:30312327-30313386	-0.748411	4.17453	0.0456581
chr6:30312565-30313531	-4.58059	2.77378	6.52315e-05
chr6:30312577-30314276	-0.136154	2.94474	0.763727
chr6:30312647-30319088	0	0.305378	1
chr6:30312692-30313641	0.341763	7.60834	0.017528
chr6:30312782-30314585	-0.00580033	4.59813	0.98482
chr6:30312828-30313971	0	0.305378	1
chr6:30313001-30314048	0	0.305378	1
chr6:30313018-30314798	-0.2007	4.83489	0.452128
chr6:30313116-30314176	-1.24078	5.33877	0.00128575
chr6:30313168-30321156	0	0.305378	1
chr6:30313269-30314249	-0.140944	5.9744	0.505526
chr6:30313295-30315549	0	0.305378	1
chr6:30313385-30314514	0.303893	8.25625	0.0151661
chr6:30313498-30314721	0.127021	10.1226	0.155052
chr6:30313532-30316048	0	0.305378	1
chr6:30313612-30314864	0.225026	5.12751	0.361394
chr6:30313827-30315296	0	0.305378	1
chr6:30314007-30315468	-0.737014	3.83489	0.0522572
chr6:30314045-30316650	0.218746	5.09236	0.382603
chr6:30314074-30323318	-0.0539927	6.92109	0.734976
chr6:30314138-30315476	1.10334	5.04131	0.000699494
chr6:30314236-30315955	0.26145	5.25921	0.289803
chr6:30314267-30316668	1.98659	3.46655	0.000367993
chr6:30314504-30316019	-4.87493	1.34798	0.00584123
chr6:30314535-30316893	-0.30574	4.83284	0.255751
chr6:30314580-30323492	0.0402353	4.9069	0.877543
chr6:30314711-30316134	0.0808435	6.60428	0.634332
chr6:30314790-30319033	-6.83806	2.65118	0.000744191
chr6:30314816-30316410	-0.551382	4.09173	0.106621
chr6:30314954-30316484	-0.574074	6.56034	0.00168651
chr6:30315297-30316611	0.398442	4.56243	0.166946
chr6:30315471-30316830	-0.0903154	6.16311	0.649168
chr6:30315542-30319274	-0.273953	5.88576	0.213291
chr6:30315550-30325714	-1.60787	5.00545	0.000160822
chr6:30315607-30316883	0.343015	5.53838	0.146283
chr6:30315956-30317396	-1.72193	3.77486	0.000630764
chr6:30316023-30319843	1.67628	5.12205	1.29094e-05
chr6:30316086-30317544	0.133383	5.36987	0.582791
chr6:30316363-30318997	0.789858	2.20504	0.271078
chr6:30316411-30321103	-0.0801561	7.37796	0.59528
chr6:30316482-30319001	-0.0441348	6.79028	0.785306
chr6:30316608-30319118	-0.187571	7.04277	0.229431
chr6:30316663-30325737	-0.509642	3.90583	0.15494
chr6:30316667-30321405	0.630373	5.3933	0.030081
chr6:30316704-30319211	-0.0623107	4.97144	0.808361
chr6:30316831-30319822	0.280007	5.17904	0.256147
chr6:30316884-30322339	-0.10904	4.21428	0.746645
chr6:30316939-30320539	0.193282	5.24313	0.434985
chr6:30317462-30320830	-0.182483	6.36276	0.316717
chr6:30318908-30321011	0.770926	6.50394	9.10553e-05
chr6:30319011-30321067	0.226151	7.15012	0.14198
chr6:30319031-30323315	0	0.305378	1
chr6:30319034-30327171	-1.15564	2.90263	0.032242
chr6:30319111-30321300	0	0.305378	1
chr6:30319201-30321345	0.306851	6.38573	0.0899325
chr6:30319249-30323490	0	0.305378	1
chr6:30319831-30322335	-0.660991	4.36629	0.0460186
chr6:30319838-30324796	0	0.305378	1
chr6:30320077-30322340	-0.56541	4.92091	0.0327644
chr6:30320685-30322709	0.625364	6.35138	0.0010268
chr6:30320837-30322989	0	0.305378	1
chr6:30321047-30323103	1.22934	3.81272	0.00598733
chr6:30321067-30325570	0.363897	6.29203	0.0517704
chr6:30321154-30327310	-0.629078	4.76432	0.0693623
chr6:30321203-30323178	0.23086	8.9158	0.0562708
chr6:30321300-30323266	0.233927	5.56905	0.31998
chr6:30321301-30325793	0.21605	3.50334	0.574762
chr6:30321457-30323436	-0.157544	4.98443	0.538561
chr6:30322336-30324240	0.172002	7.31482	0.251422
chr6:30322341-30325985	0.0548755	6.32386	0.770359
chr6:30322376-30328170	0	0.305378	1
chr6:30322553-30324484	-3.55566	3.68821	2.11784e-05
chr6:30322868-30324699	-0.587892	5.2757	0.046689
chr6:30322990-30324792	-1.82317	4.57877	0.000123759
chr6:30323130-30324915	-1.01903	4.56964	0.0104172
chr6:30323202-30326269	0.32167	7.60466	0.024537
chr6:30323244-30325548	0	0.305378	1
chr6:30323417-30325535	0.428746	8.82062	0.000100091
chr6:30323424-30327155	-0.141673	7.10094	0.357266
chr6:30323491-30331223	0.72125	5.17595	0.0370362
chr6:30323555-30325712	0.386696	5.32075	0.110476
chr6:30324418-30325862	-0.677228	5.42634	0.0096664
chr6:30324579-30325954	0.411426	5.444	0.0851683
chr6:30324704-30326181	0.389479	7.11136	0.0158517
chr6:30324793-30327482	0.53644	3.5437	0.157521
chr6:30324797-30331624	-5.39979	1.64474	0.00387786
chr6:30324908-30326256	-1.68349	4.15662	0.000258302
chr6:30325364-30327082	0	0.305378	1
chr6:30325549-30327107	0.660078	6.04536	0.0015262
chr6:30325550-30327809	0.306179	6.9494	0.0534459
chr6:30325710-30327303	0.06478	7.85804	0.632561
chr6:30325720-30332632	0.590196	6.06507	0.00450651
chr6:30325756-30328169	-0.134579	5.4866	0.57368
chr6:30325849-30327457	0.0408311	8.42762	0.731585
chr6:30325953-30327560	-0.196083	6.10844	0.329232
chr6:30325984-30331111	0	0.305378	1
chr6:30326136-30327680	0	0.305378	1
chr6:30326234-30331441	0.778522	4.2836	0.0507422
chr6:30326266-30327806	0.0939423	7.82877	0.513009
chr6:30326303-30332668	-0.621863	4.4953	0.0400662
chr6:30326847-30328137	-0.0549544	5.5495	0.816863
chr6:30327106-30328235	0.104483	10.1273	0.241607
chr6:30327156-30331961	-0.0101353	8.57629	0.930401
chr6:30327276-30329093	1.76596	2.03531	0.00675712
chr6:30327295-30333443	0	0.305378	1
chr6:30327366-30331967	-1.17858	4.51627	0.000543191
chr6:30327441-30329744	0	0.305378	1
chr6:30327541-30330119	-0.617247	4.13092	0.0805009
chr6:30327650-30330224	0.492968	8.11424	0.000593696
chr6:30327696-30332626	0.435502	6.65528	0.00929361
chr6:30327785-30330929	-0.679376	5.96697	0.00164671
chr6:30327828-30333854	-0.550661	5.40482	0.024682
chr6:30328122-30331050	0	0.305378	1
chr6:30328141-30333192	-1.19195	4.95617	0.000188502
chr6:30328248-30331222	0.0236741	5.48349	0.920906
chr6:30328368-30331426	-0.181682	5.53018	0.445308
chr6:30329463-30331619	-0.0963873	6.11034	0.633892
chr6:30329749-30331952	0.145605	8.05804	0.264093
chr6:30330129-30332044	-0.0252883	6.74876	0.878366
chr6:30330313-30332572	-2.7671	3.46961	5.60945e-05
chr6:30331062-30332681	-0.642994	4.29308	0.067469
chr6:30331076-30333420	0.758418	4.88219	0.00752774
chr6:30331113-30335319	-0.377652	6.7706	0.0223776
chr6:30331197-30332969	-0.197078	8.19152	0.117631
chr6:30331405-30333139	-0.503433	3.80102	0.165526
chr6:30331442-30333577	0.564514	6.36568	0.00198959
chr6:30331605-30333307	0.709561	3.21445	0.131176
chr6:30331620-30341162	0.932822	4.29273	0.00468712
chr6:30331643-30333818	-6.03195	2.05663	0.0032197
chr6:30331924-30333396	-0.209044	7.85859	0.123913
chr6:30331966-30335169	-1.14004	3.37159	0.0127987
chr6:30332043-30333529	4.15655	0.804213	0.00654259
chr6:30332127-30343308	0	0.305378	1
chr6:30332571-30333669	0.178979	8.901	0.10077
chr6:30332616-30335414	-0.0321313	5.55502	0.891626
chr6:30332643-30346102	-0.532058	4.36773	0.0845358
chr6:30332657-30333815	-0.388128	5.7539	0.0897816
chr6:30332956-30333988	-0.880265	5.71495	0.00113338
chr6:30333051-30338104	0.0348019	5.3061	0.886452
chr6:30333100-30334112	-0.55302	4.53299	0.0829422
chr6:30333193-30346283	0	0.305378	1
chr6:30333274-30334754	0.546184	5.97294	0.0391797
chr6:30333316-30339327	0.124572	5.96495	0.55555
chr6:30333383-30335146	-0.393633	4.92951	0.134923
chr6:30333510-30335257	-5.85039	1.93284	0.0024835
chr6:30333556-30339334	0.118701	6.52495	0.490636
chr6:30333630-30335390	0.187521	3.14585	0.657855
chr6:30333781-30337619	0.185496	3.48777	0.706241
chr6:30333816-30341144	-0.0901831	4.65956	0.745956
chr6:30333823-30347395	0	0.305378	1
chr6:30333950-30337917	-5.56623	1.7479	0.00206796
chr6:30334107-30338004	0.182598	7.50833	0.209592
chr6:30334316-30338103	-0.0645964	6.68484	0.702487
chr6:30335145-30338374	0	0.305378	1
chr6:30335156-30342929	0	0.305378	1
chr6:30335269-30338409	0.599004	6.2204	0.00186124
chr6:30335308-30357836	2.38147	0.444392	0.164678
chr6:30335398-30339292	1.55186	2.48908	0.0100496
chr6:30335406-30343231	-0.162114	4.82713	0.547046
chr6:30335702-30339493	0	0.305378	1
chr6:30337833-30339539	-0.197846	5.42176	0.411256
chr6:30337975-30340698	0.228598	5.26539	0.353975
chr6:30337996-30343520	0.0153564	7.82664	0.910973
chr6:30338089-30340898	-0.433734	3.1556	0.319871
chr6:30338099-30359906	-0.785469	5.97394	0.00224831
chr6:30338236-30341070	-1.83861	0.440192	0.329654
chr6:30338382-30341958	-5.64258	1.79643	0.00165556
chr6:30338432-30344190	-5.21244	1.53412	0.00578282
chr6:30339299-30342751	-0.212715	3.86598	0.545341
chr6:30339328-30344455	0	0.305378	1
chr6:30339396-30342836	-0.487813	7.21995	0.00143027
chr6:30339524-30343160	-0.369676	5.40618	0.139751
chr6:30340471-30343290	-0.154116	7.77103	0.263858
chr6:30340714-30343413	0.00292309	4.88837	0.991055
chr6:30341068-30343496	0	0.305378	1
chr6:30341141-30346043	-1.22517	3.30063	0.00790384
chr6:30341957-30343664	0	0.305378	1
chr6:30342622-30344073	-0.110238	7.91549	0.41038
chr6:30342831-30344105	-0.173842	4.68052	0.533391
chr6:30342920-30346081	0	0.305378	1
chr6:30343149-30344425	-0.000599629	4.92741	0.998371
chr6:30343228-30346282	-2.33314	1.85036	0.0140779
chr6:30343279-30344679	0	0.305378	1
chr6:30343280-30365281	-1.28089	3.70472	0.0122952
chr6:30343372-30344869	-2.6213	0.562913	0.168615
chr6:30343490-30345016	-0.48118	4.604	0.094991
chr6:30343497-30347274	-0.189301	6.8641	0.245194
chr6:30343605-30345151	0.197199	8.16033	0.122006
chr6:30343890-30345415	0.319647	6.54633	0.0644505
chr6:30344097-30346041	-4.66759	2.84146	5.54615e-05
chr6:30344181-30348022	-1.37858	2.33116	0.0337392
chr6:30344412-30346233	0	0.305378	1
chr6:30344459-30348772	0	0.305378	1
chr6:30344464-30365909	0.133561	6.69268	0.429019
chr6:30344653-30346749	-0.27545	7.09718	0.0781397
chr6:30344857-30347212	0.0350415	7.31914	0.81516
chr6:30344920-30349414	-5.10836	1.47471	0.00400768
chr6:30345020-30347219	0.115565	7.05784	0.459189
chr6:30345125-30347321	-0.0569653	9.89449	0.534782
chr6:30345302-30347446	0	0.305378	1
chr6:30346027-30347792	-0.571553	3.30154	0.192954
chr6:30346070-30349764	0.115106	5.0694	0.649215
chr6:30346234-30370970	1.14436	5.34198	0.000827396
chr6:30346245-30348006	0	0.305378	1
chr6:30346296-30350711	0.518914	7.49333	0.000379558
chr6:30346331-30348114	0.4635	4.0156	0.163155
chr6:30347085-30348506	0.0854396	7.70481	0.543224
chr6:30347211-30348727	0.0108346	8.67004	0.923393
chr6:30347258-30350739	0.0404049	8.56506	0.72844
chr6:30347332-30349183	-1.09806	5.05093	0.0100762
chr6:30347382-30371027	-1.4623	3.81698	0.0020264
chr6:30347445-30349396	0	0.305378	1
chr6:30347488-30357687	0.479798	5.69694	0.0382616
chr6:30347796-30349732	0.0567223	5.72444	0.805794
chr6:30348010-30349870	-0.703686	3.10504	0.113188
chr6:30348041-30357683	-0.0119303	5.96688	0.955002
chr6:30348102-30350710	0.380944	8.17614	0.00274372
chr6:30348232-30351538	-0.0625528	7.3443	0.674886
chr6:30348736-30356829	0	0.305378	1
chr6:30348759-30359167	-1.41966	4.75438	0.000311638
chr6:30349098-30357213	0.524596	7.58279	0.00280396
chr6:30349350-30357539	0	0.305378	1
chr6:30349418-30359206	-0.0924389	6.41029	0.604817
chr6:30349676-30357683	0	0.305378	1
chr6:30349774-30359808	0	0.305378	1
chr6:30349798-30357792	-3.79503	0.876734	0.0552153
chr6:30350679-30358541	0.310484	7.62964	0.0293845
chr6:30350735-30361373	-0.210211	6.07451	0.306889
chr6:30351271-30358873	0.355915	5.60096	0.130112
chr6:30354381-30359029	0.0968215	8.70871	0.388103
chr6:30357194-30359150	-0.644739	5.60292	0.0176031
chr6:30357249-30362150	0.249314	6.52589	0.149108
chr6:30357418-30359416	0.187547	6.2276	0.328563
chr6:30357682-30359638	0	0.305378	1
chr6:30357693-30364004	0	0.305378	1
chr6:30357749-30383303	0.301035	6.84463	0.0639343
chr6:30357801-30359737	0.304837	7.283	0.0420977
chr6:30357897-30364616	-0.366741	7.19174	0.0167141
chr6:30358035-30359846	0.399004	6.46617	0.0409236
chr6:30358623-30361091	0	0.305378	1
chr6:30358949-30361172	0.0390901	5.56074	0.868183
chr6:30359115-30361354	-0.13181	9.58212	0.172534
chr6:30359196-30364795	-0.314539	4.37175	0.404275
chr6:30359363-30362107	0.603263	5.15792	0.0151155
chr6:30359490-30362147	-0.234006	7.54099	0.108555
chr6:30359724-30362388	-0.169771	8.30638	0.169749
chr6:30359780-30365266	0	0.305378	1
chr6:30359845-30362691	-0.310599	8.61241	0.010879
chr6:30359864-30383333	0.195875	5.19094	0.43402
chr6:30360129-30362714	0.687294	6.29289	0.00209969
chr6:30361119-30363004	0.589846	7.30949	0.000306114
chr6:30361334-30363044	0.325031	9.76341	0.000563362
chr6:30361373-30365804	-0.275132	4.77375	0.310483
chr6:30361960-30363562	-0.415075	6.30245	0.0413833
chr6:30362133-30363773	0.502277	6.44269	0.00461788
chr6:30362134-30365921	0.104835	8.65024	0.354556
chr6:30362341-30364010	0.150546	8.42231	0.208722
chr6:30362438-30368620	-0.434288	5.29286	0.0791195
chr6:30362502-30364288	0.356671	10.2425	5.03313e-05
chr6:30362713-30364542	0	0.305378	1
chr6:30362882-30364788	0.160835	4.50992	0.594066
chr6:30363040-30365118	0.20861	7.31377	0.19431
chr6:30363489-30365236	-0.0399889	6.58537	0.816096
chr6:30363650-30365535	-6.73653	2.57248	0.00025077
chr6:30363942-30365608	-0.312159	7.31898	0.0393829
chr6:30364205-30365745	-0.100746	5.51751	0.674037
chr6:30364541-30365829	-0.508314	5.05718	0.0714417
chr6:30364592-30368620	-2.02013	3.73795	0.000412538
chr6:30364616-30383848	0.159135	7.63757	0.258378
chr6:30364746-30366207	0.964978	5.7758	0.000162344
chr6:30364789-30370916	-6.3831	2.3071	0.000791746
chr6:30365082-30368538	-0.665309	3.18558	0.221622
chr6:30365215-30368588	0.0433675	8.20253	0.733087
chr6:30365238-30371412	-0.00661587	6.42077	0.970387
chr6:30365273-30388053	-0.287139	5.66731	0.214691
chr6:30365500-30368859	0	0.305378	1
chr6:30365550-30373214	-0.153277	5.88943	0.480026
chr6:30365604-30369312	-0.283064	7.61173	0.0464902
chr6:30365724-30370308	-0.018665	6.19086	0.92432
chr6:30365840-30370685	0.4558	6.44676	0.00950078
chr6:30365856-30374103	-0.313932	5.11201	0.211876
chr6:30366202-30381879	0	0.305378	1
chr6:30366206-30370830	0.16153	8.16707	0.205569
chr6:30367363-30370969	-4.43377	1.13257	0.0108643
chr6:30368585-30371408	3.302	4.49091	0.000828845
chr6:30368621-30391789	0.135054	7.0004	0.389792
chr6:30368627-30383275	0	0.305378	1
chr6:30368744-30371853	-0.0916682	8.60234	0.423465
chr6:30368887-30372060	-0.568117	5.06535	0.0270407
chr6:30369405-30372164	0.537447	3.89854	0.134813
chr6:30370545-30372249	-0.0656165	6.98539	0.677825
chr6:30370833-30372525	0.308254	4.21132	0.33492
chr6:30370851-30383290	-5.71539	1.84366	0.00333404
chr6:30370965-30373002	-0.208797	5.72463	0.363338
chr6:30370971-30406984	-0.211198	5.89254	0.337803
chr6:30371335-30373198	-0.357429	7.29402	0.0184063
chr6:30371409-30383770	-0.112587	5.33279	0.64578
chr6:30371782-30373730	0.143086	8.68753	0.204342
chr6:30371874-30373892	-2.05232	1.21204	0.0740748
chr6:30372061-30374041	-1.1655	4.00191	0.00858337
chr6:30372183-30375735	-0.0650669	7.94452	0.62683
chr6:30372491-30377191	-2.38019	3.01616	0.00048912
chr6:30372538-30383997	0.267451	8.00561	0.0435026
chr6:30372779-30377375	0	0.305378	1
chr6:30373201-30377414	0.664844	4.64153	0.0174804
chr6:30373726-30377726	0	0.305378	1
chr6:30373885-30378986	0.686421	4.26731	0.0315744
chr6:30374040-30380397	-0.105209	6.66326	0.533037
chr6:30374097-30384986	-2.56319	2.70831	0.00410103
chr6:30374110-30407445	0	0.305378	1
chr6:30374690-30381861	-1.00595	4.84838	0.00326685
chr6:30376387-30382542	0.635331	6.96756	8.73553e-05
chr6:30377264-30382864	-0.153459	7.0603	0.32549
chr6:30377413-30382993	-0.375162	4.11588	0.255097
chr6:30377495-30385146	-0.568914	6.03382	0.0108882
chr6:30377538-30383207	-0.199274	4.62026	0.489275
chr6:30377926-30383274	0.280941	3.56261	0.457697
chr6:30379473-30383463	0	0.305378	1
chr6:30381859-30383674	-0.0304722	6.95091	0.847988
chr6:30382405-30383665	0.373125	6.1611	0.0608135
chr6:30382855-30383780	-0.316523	2.99529	0.483471
chr6:30382963-30383913	-0.0303234	6.96433	0.848691
chr6:30382994-30385827	-0.222702	5.54915	0.347449
chr6:30383069-30384028	-0.029194	4.75242	0.914652
chr6:30383271-30384327	0.151911	7.60276	0.292483
chr6:30383282-30386385	-0.50218	5.61668	0.0349771
chr6:30383332-30408067	-0.146803	5.90425	0.503821
chr6:30383406-30384422	0.374585	5.7914	0.0970481
chr6:30383535-30384738	0.802441	5.02641	0.00163077
chr6:30383661-30384999	-0.464934	5.53074	0.0544306
chr6:30383768-30386605	0.33192	3.89156	0.346221
chr6:30383779-30385133	0.0370683	7.21685	0.806824
chr6:30383834-30409066	-0.135374	4.87335	0.61082
chr6:30383893-30385427	-0.646113	5.36645	0.0253804
chr6:30383996-30386951	0.0344453	4.10439	0.9154
chr6:30384032-30385448	0.00733034	7.7847	0.957301
chr6:30384152-30385592	-1.21779	4.90373	0.000316342
chr6:30384321-30385801	0.119717	6.54204	0.486962
chr6:30384415-30387430	-0.0674356	9.11036	0.520515
chr6:30384628-30386012	0.05689	8.68717	0.614049
chr6:30384956-30386349	0.43065	5.96651	0.0409623
chr6:30385000-30387768	0.401757	5.0535	0.112012
chr6:30385103-30386524	-2.05598	3.36639	0.000476912
chr6:30385152-30410909	0	0.305378	1
chr6:30385279-30386784	-0.138875	2.76287	0.773719
chr6:30385459-30386950	1.25942	1.91968	0.0555738
chr6:30385578-30388021	0.156771	8.6963	0.16618
chr6:30385585-30386997	-0.0360793	8.68518	0.750013
chr6:30385762-30387250	0.275879	6.13107	0.165633
chr6:30385833-30391753	0.0739037	6.51234	0.671795
chr6:30385925-30387438	-0.316591	7.23966	0.0383879
chr6:30386348-30387767	0.235245	4.84009	0.375358
chr6:30386412-30406183	-0.0369038	4.14417	0.90938
chr6:30386537-30388014	-0.152989	6.30137	0.414756
chr6:30386632-30406937	-0.290643	6.80229	0.0780848
chr6:30386783-30388005	-0.356007	7.22494	0.0202357
chr6:30386903-30388517	-0.853909	4.73195	0.018506
chr6:30387011-30389097	0.154099	5.26291	0.578243
chr6:30387016-30406947	-0.239694	4.82688	0.374287
chr6:30387223-30389433	0.716497	6.45403	0.000133331
chr6:30387405-30389788	-0.403306	6.27153	0.0569513
chr6:30387462-30407434	-0.0765737	6.15778	0.697955
chr6:30387766-30390356	-0.389612	7.35714	0.00907
chr6:30387913-30391741	0.251738	4.09744	0.437424
chr6:30388016-30392146	-0.427189	7.13026	0.00578
chr6:30388020-30408063	0	0.305378	1
chr6:30388057-30412111	-0.979537	4.21045	0.0212231
chr6:30388506-30392152	0.472238	7.6198	0.000940916
chr6:30389048-30397321	0.858116	3.56048	0.0419564
chr6:30389429-30397605	-0.758832	5.55718	0.00890872
chr6:30389775-30397663	0.304967	4.02683	0.354655
chr6:30390281-30397798	-0.778152	4.87221	0.00575972
chr6:30391721-30406169	1.44462	2.3257	0.0187903
chr6:30391747-30408992	0.861421	5.13974	0.00759381
chr6:30391777-30412126	-0.153691	5.36747	0.526236
chr6:30391826-30406532	0.119679	6.25362	0.530047
chr6:30392151-30406607	-0.22286	4.93405	0.392673
chr6:30392208-30409022	-0.142398	5.48561	0.554248
chr6:30392871-30406653	0.547108	6.04071	0.0228195
chr6:30397459-30406903	-0.0606831	7.61051	0.670445
chr6:30397627-30407103	0.274084	6.5534	0.112935
chr6:30397794-30407360	0.978075	6.39444	0.000157023
chr6:30406160-30407792	-0.149521	7.80439	0.277375
chr6:30406344-30407878	0.100576	3.96329	0.765881
chr6:30406560-30408035	-0.458202	5.71817	0.0475384
chr6:30406664-30408154	0	0.305378	1
chr6:30406702-30410546	0	0.305378	1
chr6:30406890-30408295	0.895714	6.90286	3.03442e-05
chr6:30406924-30410905	0.127835	4.55886	0.653271
chr6:30406986-30414074	-0.231361	7.53572	0.112788
chr6:30407097-30408657	-1.01713	3.48038	0.0165992
chr6:30407340-30408986	-0.0799678	5.82363	0.722783
chr6:30407432-30411262	0.0648131	7.29992	0.670217
chr6:30407662-30408991	-0.0350358	7.30862	0.819795
chr6:30407859-30409235	-0.515527	3.48269	0.189517
chr6:30407999-30410116	0.432065	6.72364	0.00934614
chr6:30408059-30412091	-1.04346	4.57695	0.00111755
chr6:30408064-30415238	0.895992	4.58895	0.0081065
chr6:30408104-30410298	0.0626546	6.87783	0.698413
chr6:30408285-30410411	-1.15465	3.45841	0.0209116
chr6:30408309-30412374	-1.84701	1.97253	0.0985423
chr6:30408515-30410457	-0.0761873	8.45327	0.523774
chr6:30408760-30410584	0	0.305378	1
chr6:30408975-30410853	0.275691	3.64453	0.449811
chr6:30409021-30413301	0	0.305378	1
chr6:30409033-30415799	0.560054	6.0992	0.00593427
chr6:30409121-30411122	-1.15723	3.423	0.0209919
chr6:30409788-30411259	-0.0360506	9.02251	0.734405
chr6:30410120-30412030	0.864419	5.67658	0.00144485
chr6:30410305-30412198	0.106093	6.02992	0.623981
chr6:30410455-30412319	0.0775632	9.11959	0.461383
chr6:30410515-30413963	-0.131013	6.08003	0.523306
chr6:30410581-30412429	-0.542714	4.09385	0.117757
chr6:30410600-30418578	-0.0564349	4.14848	0.86233
chr6:30410839-30412980	-0.258912	7.17335	0.0920378
chr6:30410870-30414861	0	0.305378	1
chr6:30411058-30413245	-1.80943	2.19534	0.00859587
chr6:30411122-30414872	-4.04078	3.05255	4.04506e-05
chr6:30411250-30413502	0.0174165	8.83323	0.874537
chr6:30411263-30418584	0.271473	6.7592	0.098659
chr6:30412029-30413956	0.518806	7.84764	0.000240173
chr6:30412059-30415175	-0.449805	6.59973	0.00885064
chr6:30412114-30419223	-0.628797	6.8308	0.00220837
chr6:30412188-30414038	0	0.305378	1
chr6:30412276-30414178	-0.171183	7.37201	0.250322
chr6:30412373-30415629	-0.40696	5.46617	0.110592
chr6:30412425-30414406	0.488475	6.36325	0.00768866
chr6:30412952-30414628	1.72812	4.00126	0.000109557
chr6:30413190-30414734	0.407672	3.05609	0.347759
chr6:30413282-30416249	-0.239311	4.74868	0.379899
chr6:30413465-30414860	-0.39388	6.98507	0.0127454
chr6:30413908-30415142	-0.422473	7.06953	0.00679716
chr6:30413966-30421108	0.446896	3.7386	0.212334
chr6:30413971-30416504	0.990794	4.0224	0.0189294
chr6:30414011-30415182	-0.144452	7.84619	0.288418
chr6:30414115-30415607	-0.630549	4.18889	0.0565883
chr6:30414195-30417411	-0.0842645	8.33196	0.48988
chr6:30414299-30415746	-0.239826	0.679891	0.868804
chr6:30414542-30416193	-1.21464	5.06166	0.000200135
chr6:30414708-30416223	0.361036	6.33255	0.051357
chr6:30414847-30416402	-0.346166	5.78206	0.12639
chr6:30414862-30418564	0.872856	4.31786	0.0462634
chr6:30414902-30421119	0.309419	7.94972	0.0242904
chr6:30414978-30416669	0.0972103	6.69741	0.557659
chr6:30415179-30416986	0.48499	6.41556	0.0175027
chr6:30415183-30418857	-0.010467	9.04545	0.921782
chr6:30415585-30417370	-0.102689	5.19307	0.678907
chr6:30415600-30419221	0.205743	5.7467	0.363381
chr6:30415723-30417510	0.436867	5.63517	0.157271
chr6:30415798-30428364	0.474716	5.94807	0.027799
chr6:30415819-30419570	1.14404	2.68104	0.0572314
chr6:30416007-30417852	-4.74206	1.27953	0.0140651
chr6:30416222-30418426	0.087446	6.4859	0.617696
chr6:30416286-30419661	-0.517786	4.07626	0.226458
chr6:30416392-30418540	0.490584	4.25645	0.113754
chr6:30416588-30418650	0	0.305378	1
chr6:30416782-30418814	0.387896	5.22061	0.115903
chr6:30417365-30418988	-0.0327221	4.71318	0.905249
chr6:30417394-30419895	0.826531	5.74715	0.00219497
chr6:30417509-30419031	0.277901	5.1094	0.265323
chr6:30417516-30428915	1.56884	3.50491	0.00979217
chr6:30417727-30419220	-0.203367	3.61967	0.587122
chr6:30418178-30419542	-0.26992	5.34983	0.275645
chr6:30418495-30419567	0.0648486	6.01528	0.756873
chr6:30418562-30420959	-3.79537	0.877221	0.0560707
chr6:30418570-30433494	-1.48579	1.9947	0.0390727
chr6:30418632-30419673	-0.469009	5.20416	0.0779647
chr6:30418789-30419865	-0.07677	6.06117	0.707491
chr6:30418844-30420983	-0.077218	7.44393	0.602381
chr6:30418875-30419980	0.62049	5.24787	0.0119789
chr6:30418989-30420357	-1.12146	4.30971	0.00244601
chr6:30419043-30421157	-0.156961	5.48403	0.511892
chr6:30419219-30420494	-2.68936	3.71653	0.000118133
chr6:30419222-30433526	0.867287	5.41055	0.0039293
chr6:30419263-30421512	-0.490829	5.11651	0.0879242
chr6:30419364-30420584	0	0.305378	1
chr6:30419553-30420773	-0.697184	5.60769	0.00413782
chr6:30419647-30428107	0.723724	4.66366	0.0317466
chr6:30419670-30420937	0.6089	5.16945	0.0139942
chr6:30419754-30434299	0.229152	2.08358	0.710051
chr6:30419835-30421121	0.057442	7.77214	0.676186
chr6:30419894-30428269	0.305706	7.12221	0.0488879
chr6:30419927-30421247	1.298	5.87332	1.28987e-05
chr6:30420287-30421470	-0.930633	4.43286	0.00809893
chr6:30420404-30421571	0.103253	9.39471	0.302247
chr6:30420549-30421683	-0.180245	3.68184	0.621512
chr6:30420593-30428875	-0.35809	4.53165	0.225405
chr6:30420772-30423596	-0.132188	6.73875	0.425514
chr6:30420913-30423828	-1.53289	3.87079	0.00930784
chr6:30420949-30431203	2.23196	2.1315	0.00337471
chr6:30421112-30435383	0.0756733	7.353	0.610992
chr6:30421120-30424981	-6.14056	2.13216	0.00153488
chr6:30421156-30431790	-0.252631	6.41661	0.164689
chr6:30421236-30425491	0	0.305378	1
chr6:30421419-30425910	0.0461622	6.72475	0.778557
chr6:30421471-30432250	0.643324	4.66474	0.023154
chr6:30421568-30426392	-0.568182	4.6965	0.0630085
chr6:30421660-30427461	-0.452295	3.89971	0.295685
chr6:30421693-30432525	0	0.305378	1
chr6:30422996-30428042	-0.14992	8.93001	0.165716
chr6:30423597-30428102	-1.16995	5.06386	0.00017918
chr6:30424699-30428244	0	0.305378	1
chr6:30424990-30428325	-0.0211617	5.40203	0.930855
chr6:30425880-30428601	0.582491	6.24574	0.00227369
chr6:30426023-30428789	0.849446	5.14241	0.00190776
chr6:30426853-30428856	0	0.305378	1
chr6:30427889-30429000	0.171665	7.86499	0.203299
chr6:30428101-30430019	-0.214197	5.80113	0.341002
chr6:30428201-30430703	-0.174321	6.61226	0.307809
chr6:30428245-30433273	0	0.305378	1
chr6:30428288-30430957	0.436395	5.34965	0.0816403
chr6:30428329-30448294	0.463313	3.78022	0.18698
chr6:30428470-30430978	0.739421	4.27437	0.0175734
chr6:30428723-30431122	-0.904337	4.28452	0.00516999
chr6:30428849-30431270	0	0.305378	1
chr6:30428874-30433482	0.0734622	8.07634	0.570416
chr6:30428881-30448936	-0.141985	2.84724	0.797914
chr6:30428971-30431527	-0.125809	5.56513	0.594954
chr6:30429599-30431691	-0.192267	6.47593	0.277865
chr6:30430688-30431750	0.43478	4.11295	0.178034
chr6:30430833-30431983	0.0518289	8.1737	0.685156
chr6:30430977-30432153	0.308872	3.90207	0.370536
chr6:30431072-30433800	0.593446	5.79503	0.00836807
chr6:30431118-30432415	-0.524695	6.46882	0.00661349
chr6:30431235-30432523	0	0.305378	1
chr6:30431321-30434076	0	0.305378	1
chr6:30431378-30432688	-0.0322117	5.99281	0.879508
chr6:30431555-30433040	-0.115172	4.87523	0.663742
chr6:30431707-30433071	-0.0569309	8.69193	0.612578
chr6:30431982-30433208	0	0.305378	1
chr6:30432021-30434301	-0.76902	4.57402	0.0180202
chr6:30432144-30433315	0.0493255	6.92041	0.756272
chr6:30432407-30433435	0.203206	6.42688	0.252001
chr6:30432420-30434543	-0.207162	4.83688	0.436314
chr6:30432498-30433739	-0.249945	5.50968	0.313206
chr6:30432607-30449470	0.317754	4.78388	0.237559
chr6:30432612-30433769	0.694811	5.3868	0.00686327
chr6:30432906-30433910	0.0212574	7.17962	0.890379
chr6:30433041-30434012	-0.698096	5.81315	0.00240872
chr6:30433108-30435183	0	0.305378	1
chr6:30433207-30434114	1.32323	3.80499	0.00486584
chr6:30433328-30434250	1.07093	3.35056	0.0142293
chr6:30433412-30435396	0	0.305378	1
chr6:30433428-30434474	0.0702742	7.63789	0.621425
chr6:30433503-30457248	0.41036	6.23735	0.0538628
chr6:30433533-30434587	0.361869	8.27154	0.00364897
chr6:30433751-30434909	0.377997	5.48294	0.113973
chr6:30433810-30437774	0.484927	3.77721	0.239764
chr6:30433882-30435112	0.134269	6.59749	0.427909
chr6:30434011-30435318	-0.334165	7.41791	0.0248536
chr6:30434052-30448260	-1.00891	2.97995	0.0336689
chr6:30434128-30435502	0.953799	4.99058	0.0013441
chr6:30434228-30435770	0	0.305378	1
chr6:30434257-30448659	0.00718624	4.87332	0.977956
chr6:30434308-30457256	0.695773	5.35319	0.012004
chr6:30434459-30436687	-0.0903467	9.90969	0.323677
chr6:30434528-30448847	0.676872	2.57015	0.177214
chr6:30434595-30437681	0.132959	6.153	0.501974
chr6:30434908-30437771	-0.452027	7.48858	0.00234533
chr6:30435101-30438632	-1.35234	3.29314	0.0063063
chr6:30435166-30449331	2.39745	0.461352	0.284087
chr6:30435305-30457956	0	0.305378	1
chr6:30435310-30439408	0.915535	5.26292	0.00383818
chr6:30435395-30449554	-0.325598	5.19848	0.195242
chr6:30435501-30444339	-0.185532	6.98136	0.240702
chr6:30435752-30447728	0.550739	4.71128	0.104559
chr6:30435781-30449880	0.773953	6.36288	0.000158209
chr6:30436065-30447753	-0.182749	4.2457	0.566448
chr6:30436675-30447966	0	0.305378	1
chr6:30437684-30448254	0.424702	6.25623	0.0261226
chr6:30437997-30448480	0.0955879	6.92676	0.546514
chr6:30438886-30448610	-1.22622	5.5396	7.38789e-05
chr6:30439442-30448808	0.0599027	5.73099	0.793597
chr6:30447466-30448907	0.516401	5.19528	0.0372203
chr6:30447715-30449287	0.181256	5.73394	0.425806
chr6:30447947-30449416	-0.0719794	8.11332	0.577468
chr6:30448233-30449466	-0.0476405	6.45454	0.787638
chr6:30448254-30452509	-0.215891	6.36189	0.235596
chr6:30448304-30458519	-6.14036	2.13192	0.00363712
chr6:30448415-30449635	0.0601792	8.97434	0.57526
chr6:30448481-30455683	-0.851448	5.98031	0.00130806
chr6:30448569-30449775	-0.0981687	6.4113	0.634429
chr6:30448751-30449877	0.110767	5.25007	0.653305
chr6:30448800-30455684	-3.49902	0.780014	0.0521867
chr6:30448905-30450629	0.395295	7.35746	0.0109884
chr6:30448905-30462292	1.37825	4.92624	0.00143046
chr6:30449246-30451280	-0.0654917	9.37436	0.513651
chr6:30449301-30455900	0.254106	4.02017	0.457839
chr6:30449372-30451297	0.193544	8.22561	0.126213
chr6:30449469-30464278	-0.22682	7.06703	0.147313
chr6:30449477-30451667	1.06936	2.63875	0.0312212
chr6:30449553-30457208	0.230949	5.20067	0.35073
chr6:30449606-30451881	0.355848	5.69623	0.120694
chr6:30449758-30452151	-0.153004	9.22406	0.136932
chr6:30449812-30457405	-0.109075	7.05241	0.485887
chr6:30449876-30452480	0.702943	5.11102	0.00666928
chr6:30450063-30452508	0.0591281	7.17196	0.701815
chr6:30450968-30453841	-0.00492115	10.0821	0.956111
chr6:30451294-30453965	-0.347895	6.74786	0.0356609
chr6:30451643-30454068	-0.35476	4.24039	0.298819
chr6:30451796-30455550	-0.187654	7.30979	0.215263
chr6:30451882-30457600	0	0.305378	1
chr6:30451901-30455682	-0.0293734	8.10857	0.82105
chr6:30452243-30455815	0.164753	7.06157	0.287071
chr6:30452487-30455872	-0.021619	5.9405	0.919709
chr6:30453715-30456061	-3.79514	0.876897	0.0301745
chr6:30453878-30456330	0.221554	7.0378	0.154996
chr6:30454067-30457146	-0.0352272	8.07453	0.787158
chr6:30454069-30457939	0.163294	5.83805	0.467081
chr6:30455371-30457207	0.0706191	8.36634	0.563858
chr6:30455619-30457340	-0.0565603	8.26038	0.652408
chr6:30455670-30458287	0	0.305378	1
chr6:30455744-30457417	-1.43167	4.21663	0.000810423
chr6:30455848-30457573	0.128036	6.6681	0.448555
chr6:30455894-30458503	-0.6292	6.67467	0.000504092
chr6:30455920-30464287	-0.127361	7.29785	0.399043
chr6:30455951-30457843	0.010916	3.24617	0.979238
chr6:30456062-30457845	0.185969	6.12332	0.355467
chr6:30457050-30458032	-0.0678567	6.50234	0.698604
chr6:30457143-30458771	-0.162	7.99089	0.222445
chr6:30457173-30458179	0.386541	6.02665	0.0642721
chr6:30457268-30464790	-0.214795	6.16618	0.276336
chr6:30457314-30458224	-0.457229	4.8876	0.142177
chr6:30457404-30460608	0.00353171	5.39512	0.988271
chr6:30457416-30458409	0.22211	6.16381	0.260408
chr6:30457512-30458493	-0.268651	6.9171	0.0933339
chr6:30457599-30461670	0.00111296	7.21816	0.994245
chr6:30457707-30458623	0.26156	6.93129	0.102194
chr6:30457844-30458719	-0.148627	5.86358	0.499881
chr6:30457897-30461729	0.0471028	8.36077	0.699064
chr6:30457955-30465517	-0.106837	4.82506	0.688437
chr6:30458001-30459515	0.283951	7.30143	0.057753
chr6:30458125-30460109	-0.151257	6.01305	0.470621
chr6:30458236-30460220	1.14349	3.51958	0.0131135
chr6:30458241-30462256	0.814113	6.40387	0.000243825
chr6:30458378-30460616	0.233448	3.92022	0.497686
[truncated: 10,003 more rows]
