# Supplementary material for: A tiling-deletion-based genetic screen for cis-regulatory element identification in mammalian cells
Source: Springer Nature journal article supplement (doi:10.1038/nmeth.4264), 2017-04-17
Supplement: nmeth.4264-S7.xlsx [file nmeth.4264-S7.xlsx]

## Sheet: Sheet1
list of CRE	seqnames	start	end	distance to POU5F1 TSS (kb)	width	strand	# of positive sgRNAs	CRE ranking	peak signal	promoter	DRE	Gene Index	promoter CRE associate genes	enhancer	Hotspot	DHS	exon	Atf2	Atf3	Bach1	Bcl11a	Brca1	Cebpb	Chd1	Chd2	Cjun	Cmyc	Ctbp2	Ctcf	Egr1	Ezh	Fosl1	Gabp	Gtf2f1	Hdac2	Jund	JARID1A	Mafk	Max	Mxi1	Nanog	Nrf1	Nrsf	P300	Pol2	Pou5f1	Prmd14	Rad21	Rbbp5
CRE(+861)	chr6	30275834	30277834	861.617	2001	*	4	36	0.18549	0	0			0	0	0	0	0	0	0	0	0	0	0	0	0	0	0	0	0	0	0	0	0	0	0	0	0	0	0	0	0	0	0	0	0	0	0	0
CRE(+723)	chr6	30414034	30416033	723.418	2000	*	2	14	0.824861	0	2			1	1	1	0	0	0	0	1	0	0	0	0	0	0	0	1	0	0	0	0	0	1	0	0	0	0	0	0	0	0	0	0	0	1	1	0
CRE(+535)	chr6	30601434	30604834	535.317	3401	*	3	10	0.923937	0	2			0	1	1	0	0	0	0	0	0	0	0	0	0	0	0	0	0	0	0	0	0	0	0	0	0	0	0	0	0	0	0	0	0	0	0	0
CRE(+347)	chr6	30789609	30792558	347.368	2950	*	2	43	0.0556216	0	2			1	1	1	0	0	0	0	0	0	0	0	0	0	0	0	1	0	0	0	0	0	0	0	0	0	0	0	0	0	0	0	0	0	0	1	0
CRE(+195)	chr6	30941934	30944458	195.255	2525	*	3	38	0.182788	0	0			0	0	0	0	0	0	0	0	0	0	0	0	0	0	0	1	0	0	0	0	0	0	0	0	0	0	0	0	0	0	0	0	0	0	1	0
CRE(+54)	chr6	31083559	31086033	53.655	2475	*	3	40	0.165277	0	2			0	1	1	1	0	0	0	0	0	0	0	0	0	0	0	0	0	0	0	0	0	0	0	0	0	0	0	0	0	0	0	0	0	0	0	0
CRE(+38)	chr6	31099159	31101158	38.2925	2000	*	2	37	0.184318	0	2			0	1	1	0	0	0	0	0	0	0	0	0	0	0	0	0	0	0	0	0	0	0	0	0	0	0	0	0	0	0	0	0	1	1	0	0
CRE(+25)	chr6	31112634	31114634	24.817	2001	*	3	30	0.367838	0	0			0	0	0	1	0	0	0	0	0	0	0	0	0	0	0	0	0	0	0	0	0	0	0	0	0	0	0	0	0	0	0	0	0	0	0	0
CRE(+12, pTCF19/CCHCR1)	chr6	31125459	31127458	11.9925	2000	*	4	20	0.3709	1	2	NM_001105564,NM_007109,NM_001105563,NM_001077511,NM_019052,NM_001318908	TCF19 and CCHCR1	0	1	1	1	0	0	0	0	0	0	0	1	0	0	0	1	1	0	0	0	0	1	0	0	0	0	0	0	1	0	0	1	0	0	1	0
CRE(0. pPOU5F1)	chr6	31130734	31146958	-0.395	16225	*	39	1	9.38469	1	2	NM_203289,NM_001285986,NM_001285987,NM_001173531,NM_002701,NR_026816	POU5F1	1	1	1	1	1	0	0	1	0	0	1	1	0	0	1	0	1	0	0	0	0	1	1	0	0	1	0	1	0	1	1	1	1	1	1	1
CRE(-13)	chr6	31148209	31155584	-13.4455	7376	*	2	16	0.517055	0	2			0	1	1	0	0	0	0	0	0	0	0	1	0	0	0	0	0	0	0	0	0	0	0	0	0	0	0	0	0	0	0	0	0	0	0	0
CRE(-31)	chr6	31168159	31170958	-31.1075	2800	*	6	21	0.3709	0	2			1	1	1	1	0	0	0	0	0	0	0	0	0	0	0	0	0	0	0	0	0	0	0	0	0	0	0	0	0	0	0	0	0	0	0	0
CRE(-328, pMICB)	chr6	31465559	31467558	-328.108	2000	*	2	22	0.3709	1	2	NM_001289161,NM_005931	MICB	0	1	1	1	0	0	0	0	0	0	0	0	0	0	0	0	0	0	0	0	0	0	0	0	0	0	0	0	1	0	0	1	0	0	0	0
CRE(-341)	chr6	31478284	31480834	-341.108	2551	*	4	11	0.923937	0	1			0	1	0	1	0	0	0	0	0	0	0	0	0	0	0	0	0	0	0	0	0	0	0	0	0	0	0	0	0	0	0	0	0	0	0	0
CRE(-365, pSNORD117)	chr6	31501359	31505358	-364.908	4000	*	5	12	0.878335	1	1	NR_003140	SNORD117, non-coding	0	0	1	1	0	0	0	0	0	0	0	0	0	0	0	0	0	0	0	0	0	0	0	0	0	0	0	0	0	0	0	1	0	0	0	0
CRE(-401, pLTA)	chr6	31538359	31540358	-400.908	2000	*	2	34	0.229189	1	2	NM_001159740,NM_000595	LTA	0	1	1	1	0	0	0	0	0	0	0	0	0	0	0	0	0	0	0	0	0	0	0	0	0	0	0	0	0	0	0	0	0	0	0	0
CRE(-404, TNF)	chr6	31541709	31543708	-404.257	2000	*	4	44	0.0556216	1	2	NM_000594	TNF	0	1	1	1	0	0	0	0	0	0	0	0	0	0	0	1	0	0	0	0	0	0	0	0	0	0	0	0	0	0	0	0	0	0	1	0
CRE(-411, pLTB)	chr6	31548084	31550083	-410.632	2000	*	5	6	1.10678	1	2	NM_009588,NM_002341	LTB	0	1	1	1	1	0	1	0	0	1	0	0	0	0	1	1	0	0	0	0	0	1	0	0	0	0	0	0	0	0	0	0	0	0	1	1
CRE(-444, pATF1)	chr6	31581159	31583708	-443.983	2550	*	4	45	0.0556216	1	0	NM_004847,NM_001318970,NM_001623,NM_032955	ATF1	1	0	0	1	0	0	0	0	0	0	0	0	0	0	0	0	0	0	0	0	0	0	0	0	0	0	0	0	0	0	0	0	0	0	0	0
CRE(-449, pPRRC2A)	chr6	31586034	31588234	-448.683	2201	*	3	23	0.3709	1	2	NM_080686,NM_004638	PRRC2A	0	1	1	0	1	0	0	0	0	0	0	0	0	0	0	0	1	0	0	0	1	0	0	0	0	0	0	0	1	0	0	1	0	0	0	0
CRE(-459)	chr6	31596059	31598058	-458.608	2000	*	3	17	0.461434	0	0			0	0	0	1	0	0	0	0	0	0	0	0	0	0	0	0	0	0	0	0	0	0	0	0	0	0	0	0	0	0	0	0	0	0	0	0
CRE(-470)	chr6	31606659	31609158	-469.457	2500	*	5	5	1.13748	0	2			0	1	1	1	0	0	0	0	0	0	0	0	0	0	0	0	0	0	0	0	0	0	0	0	0	0	0	0	0	0	0	1	0	0	0	0
CRE(-475)	chr6	31612209	31614358	-474.832	2150	*	4	39	0.182788	0	2			0	1	1	1	0	0	0	0	0	0	0	0	0	0	0	0	0	0	0	0	0	0	0	0	0	0	0	0	0	0	0	0	0	0	0	0
CRE(-481, pAPOM)	chr6	31618584	31620908	-481.295	2325	*	2	32	0.327258	1	2	NM_001199697,NM_001199698,NM_004639,NM_080703,NM_001098534,NM_001256169,NM_080702,NR_045828	APOM	0	1	1	1	1	0	1	0	0	0	1	1	0	0	0	0	1	0	0	1	0	0	1	0	0	1	0	0	1	0	1	1	0	1	1	1
CRE(-497, pGPANK1/CSNK28)	chr6	31633584	31636883	-496.783	3300	*	6	4	1.33008	1	2	NM_021221,NM_001199239,NM_001199240,NM_001199238,NM_001199237,NM_033177,NM_001282385,NM_001320	GPANK1, CSNK2B	0	1	1	1	0	1	0	0	0	0	0	0	0	0	0	0	0	0	0	1	0	0	0	0	0	0	0	0	0	0	0	1	0	0	0	1
CRE(-521)	chr6	31658534	31660533	-521.082	2000	*	4	24	0.3709	0	0			0	0	0	1	0	0	0	0	0	0	0	0	0	0	0	0	0	0	0	0	0	0	0	0	0	0	0	0	0	0	0	0	0	0	0	0
CRE(-558)	chr6	31695084	31697083	-557.633	2000	*	3	25	0.3709	0	2			0	1	1	1	0	0	0	0	0	0	0	0	0	0	1	0	0	0	0	0	0	0	0	0	0	0	0	0	0	0	0	0	0	1	0	0
CRE(-571, pCLIC1)	chr6	31707684	31710934	-570.858	3251	*	6	9	1.00804	1	2	NM_025259,NM_172166,NM_002441,NR_037846,NM_172165	MSH5, CLIC1	1	1	1	1	1	0	0	0	0	0	1	1	0	0	0	0	0	0	0	0	1	0	0	0	0	1	1	0	1	0	1	1	0	0	0	0
CRE(-593, pMSH5/SAPCD1)	chr6	31730309	31732308	-592.857	2000	*	4	41	0.164318	1	2	NM_001039651	MSH5, SAPCD1	0	1	1	1	0	0	0	0	0	0	0	0	0	0	0	0	0	0	0	0	0	0	0	0	0	0	0	0	0	0	1	0	0	0	0	0
CRE(-606, pVARS/VWA7)	chr6	31743034	31745858	-605.995	2825	*	4	26	0.3709	1	2	NM_025258	VARS, VWA7	0	1	1	1	0	0	0	0	0	0	0	0	0	0	0	0	0	0	0	0	0	0	0	0	0	0	0	0	0	0	0	1	0	0	0	0
CRE(-652)	chr6	31789209	31791208	-651.758	2000	*	3	27	0.3709	0	2			0	1	1	0	0	0	1	0	0	1	1	0	0	0	0	0	1	0	0	0	0	0	0	0	1	0	0	0	0	0	0	1	0	1	0	1
CRE(-694, pNEU1)	chr6	31830134	31833658	-693.445	3525	*	2	13	0.878268	1	2	NM_000434	NEU1, SLC44A4	0	1	1	1	1	1	0	0	0	0	0	1	0	0	0	0	1	0	0	0	0	0	1	0	0	1	1	0	0	0	0	1	0	0	0	0
CRE(-728, pEHMT2/C2/ZBTB12)	chr6	31865809	31867808	-728.357	2000	*	3	19	0.386074	1	2	NM_025256,NM_006709,NM_001289413,NM_001318833,NM_001178063	EHMT2, C2, ZBTB12	0	1	1	1	0	0	0	0	0	0	0	0	0	0	0	1	0	0	0	0	0	0	0	0	0	0	0	0	0	0	0	0	0	0	0	0
CRE(-765)	chr6	31901534	31905034	-764.833	3501	*	6	7	1.10678	0	2			0	1	1	1	0	0	0	0	0	0	0	0	0	0	0	0	0	0	0	0	0	0	0	0	0	0	0	0	0	0	0	0	0	0	0	0
CRE(-768)	chr6	31905634	31907633	-768.183	2000	*	4	35	0.2288	0	0			0	0	0	1	0	0	0	0	0	0	0	0	0	0	0	0	0	0	0	0	0	0	0	0	0	0	0	0	0	0	0	0	0	0	0	0
CRE(-778, pC2/CFB)	chr6	31913384	31919133	-777.808	5750	*	7	31	0.336615	1	0	NM_001710	C2, CFB	0	0	0	1	0	0	0	0	0	0	0	0	0	0	0	0	0	0	0	0	0	0	0	0	0	0	0	0	0	0	0	1	0	0	0	0
CRE(-783)	chr6	31920634	31922633	-783.183	2000	*	3	15	0.655008	0	0			0	0	0	1	0	0	0	0	0	0	0	0	0	0	0	0	0	0	0	0	0	0	0	0	0	0	0	0	0	0	0	0	0	0	0	0
CRE(-886)	chr6	32022959	32024958	-885.508	2000	*	4	18	0.439533	0	0			0	0	0	1	0	0	0	0	0	0	0	0	0	0	0	0	0	0	0	0	0	0	0	0	0	0	0	0	0	0	0	0	0	0	0	0
CRE(-893)	chr6	32030809	32032908	-893.408	2100	*	5	42	0.0932453	0	0			0	0	0	1	0	0	0	0	0	0	0	0	0	0	0	0	0	0	0	0	0	0	0	0	0	0	0	0	0	0	0	0	0	0	0	0
CRE(-898)	chr6	32034934	32036933	-897.482	2000	*	6	33	0.317991	0	0			0	0	0	1	0	0	0	0	0	0	0	0	0	0	0	0	0	0	0	0	0	0	0	0	0	0	0	0	0	0	0	0	0	0	0	0
CRE(-919)	chr6	32055609	32059558	-919.133	3950	*	7	2	3.42673	0	1			0	1	0	1	0	0	1	0	0	0	0	0	0	0	0	0	0	0	0	0	0	0	0	0	0	0	0	0	0	0	1	0	0	0	1	0
CRE(-928)	chr6	32064934	32066933	-927.482	2000	*	3	3	1.51372	0	0			0	0	0	1	0	0	1	0	0	0	0	0	0	0	0	0	0	0	0	0	0	0	0	0	0	0	0	0	0	0	0	0	0	0	0	0
CRE(-934)	chr6	32071084	32074483	-934.332	3400	*	4	28	0.3709	0	1			0	1	0	0	0	0	0	0	0	0	0	0	0	0	0	0	0	0	0	0	0	0	0	0	0	0	0	0	0	1	0	0	0	0	0	0
CRE(-977)	chr6	32114259	32116258	-976.808	2000	*	2	29	0.3709	0	1			0	1	0	1	0	0	0	0	0	1	0	0	0	0	0	0	0	0	0	0	0	0	0	0	0	0	0	0	0	0	0	0	0	0	1	0
CRE(-994, pPPT2/EGFL8)	chr6	32130584	32134008	-993.845	3425	*	6	8	1.03721	1	0	NM_030652,NR_037860	PPT2, EGFL8	0	0	0	1	0	0	0	0	0	0	0	0	0	0	0	0	0	0	0	0	0	0	0	0	0	0	0	0	0	0	0	0	0	0	0	0
										18
[truncated: 27 more columns]
